# Supplementary material for: Schwann cell precursors represent a neural crest‐like state with biased multipotency
Source: PubMed Central journal article supplement (PMC9434083; doi:10.15252/embj.2021108780), 2022-07-11
Supplement: EMBJ-41-e108780-s001.pdf [file EMBJ-41-e108780-s001.pdf]

| names    | class  | TF    |
|----------|--------|-------|
| Hmga2    | common | TRUE  |
| Igf2bp1  | common | FALSE |
| Pabpc1   | common | FALSE |
| Hn1l     | common | FALSE |
| Grb10    | common | FALSE |
| Crabp2   | common | FALSE |
| Mybbp1a  | common | FALSE |
| Kpnb1    | common | FALSE |
| Cdca7    | common | FALSE |
| Cbx5     | common | FALSE |
| Cad      | common | FALSE |
| Gas1     | common | FALSE |
| Cse1l    | common | FALSE |
| Sox9     | common | TRUE  |
| Set      | common | FALSE |
| Nrip1    | common | FALSE |
| Supt16   | common | FALSE |
| Dkc1     | common | FALSE |
| Pfas     | common | FALSE |
| Trim28   | common | TRUE  |
| Ncl      | common | FALSE |
| Arhgef26 | common | FALSE |
| Mtap     | common | FALSE |
| Ptbp1    | common | FALSE |
| Arhgap28 | common | FALSE |
| Pls3     | common | FALSE |
| Rcc1     | common | FALSE |
| Caprin1  | common | FALSE |
| Peg12    | common | FALSE |
| Col2a1   | common | FALSE |
| Eif4g2   | common | FALSE |
| Nap1l1   | common | TRUE  |
| Ets1     | common | TRUE  |
| Bub1b    | common | FALSE |
| Ssrp1    | common | TRUE  |
| Tcof1    | common | FALSE |
| Hspa4    | common | FALSE |
| G3bp1    | common | FALSE |
| Dtx4     | common | FALSE |
| Uhrf1    | common | FALSE |
| Gsta4    | common | FALSE |
| Gli3     | common | TRUE  |
| Mcm6     | common | FALSE |
| Nedd9    | common | FALSE |
| Hspd1    | common | FALSE |
| Yap1     | common | FALSE |
| Pa2g4    | common | FALSE |
| Ipo11    | common | FALSE |
| Parp1    | common | TRUE  |

|           |        |       |
|-----------|--------|-------|
| Mcm5      | common | FALSE |
| Lef1      | common | TRUE  |
| Npm1      | common | FALSE |
| Dna2      | common | FALSE |
| Ppp2r1b   | common | FALSE |
| Hnrnpu    | common | FALSE |
| Ppat      | common | FALSE |
| Skp2      | common | FALSE |
| Txnrd1    | common | FALSE |
| Wdr77     | common | FALSE |
| Eftud2    | common | FALSE |
| Mcm4      | common | FALSE |
| Ctnnb1    | common | TRUE  |
| Cct8      | common | FALSE |
| Abce1     | common | FALSE |
| Sf3b3     | common | FALSE |
| Atad2     | common | FALSE |
| Msh6      | common | FALSE |
| Chaf1a    | common | FALSE |
| Kif21b    | common | FALSE |
| Fbn2      | common | FALSE |
| Eif5a     | common | FALSE |
| Sep-09    | common | FALSE |
| Greb1     | common | FALSE |
| Mcm3      | common | FALSE |
| Cdk18     | common | FALSE |
| Rbbp7     | common | FALSE |
| Mapk1ip1l | common | FALSE |
| Pgk1      | common | FALSE |
| Nudt4     | common | FALSE |
| Cdh6      | common | FALSE |
| Mcm7      | common | FALSE |
| Ajuba     | common | FALSE |
| Lrig3     | common | FALSE |
| Mcm2      | common | FALSE |
| Ccnd2     | common | FALSE |
| Hsp90ab1  | common | FALSE |
| Ahcy      | common | FALSE |
| Ppa1      | common | FALSE |
| Igf2bp2   | common | FALSE |
| Polr2m    | common | FALSE |
| Naa15     | common | FALSE |
| Snx5      | common | FALSE |
| Eif3b     | common | FALSE |
| Npr3      | common | FALSE |
| Eif3a     | common | FALSE |
| Pfkl      | common | FALSE |
| ErbB2     | common | FALSE |
| Kif20a    | common | FALSE |
| Odc1      | common | TRUE  |

|          |        |       |
|----------|--------|-------|
| Nes      | common | FALSE |
| Cct3     | common | FALSE |
| Kif15    | common | FALSE |
| Mest     | common | FALSE |
| Notch3   | common | FALSE |
| Serpinf1 | common | FALSE |
| Umps     | common | FALSE |
| Heatr3   | common | FALSE |
| Gja1     | common | FALSE |
| Figl1    | common | FALSE |
| Bzw1     | common | FALSE |
| Ran      | common | TRUE  |
| Nasp     | common | FALSE |
| Wdr43    | common | FALSE |
| Phf6     | common | FALSE |
| Usp10    | common | FALSE |
| Hells    | common | FALSE |
| Slc25a13 | common | FALSE |
| Gmps     | common | FALSE |
| Api5     | common | FALSE |
| Tmpo     | common | FALSE |
| Smo      | common | FALSE |
| Gspt1    | common | FALSE |
| Nop58    | common | FALSE |
| Zfp568   | common | TRUE  |
| Serbp1   | common | FALSE |
| Rrm1     | common | FALSE |
| Cand1    | common | FALSE |
| Nol10    | common | FALSE |
| Ncapg    | common | FALSE |
| Ddx39    | common | FALSE |
| Isg2012  | common | FALSE |
| Ptcd3    | common | FALSE |
| Notch2   | common | FALSE |
| Fen1     | common | FALSE |
| Smad3    | common | TRUE  |
| Smyd5    | common | FALSE |
| Cirh1a   | common | FALSE |
| Etf1     | common | FALSE |
| Mdn1     | common | FALSE |
| Ftsj3    | common | FALSE |
| Kars     | common | FALSE |
| Eif4g1   | common | FALSE |
| Cul4b    | common | FALSE |
| Pole     | common | FALSE |
| St5      | common | FALSE |
| Xpot     | common | FALSE |
| Mthfd1l  | common | FALSE |
| Cct4     | common | FALSE |
| Cdca7l   | common | FALSE |

|         |        |       |
|---------|--------|-------|
| Nucks1  | common | FALSE |
| Cnbp    | common | FALSE |
| Srsf6   | common | FALSE |
| Bms1    | common | FALSE |
| Dnmt1   | common | TRUE  |
| Clspn   | common | FALSE |
| Spata13 | common | FALSE |
| Hnrnpm  | common | FALSE |
| Rrm2    | common | FALSE |
| Xpo1    | common | FALSE |
| Anp32b  | common | FALSE |
| Eif4b   | common | FALSE |
| Nup93   | common | FALSE |
| Top2a   | common | FALSE |
| Ccne1   | common | FALSE |
| Lap3    | common | FALSE |
| Phactr1 | common | FALSE |
| Cdc20   | common | FALSE |
| Psme3   | common | FALSE |
| Hat1    | common | FALSE |
| Nup188  | common | FALSE |
| Peg10   | common | FALSE |
| Rpa1    | common | FALSE |
| Nol9    | common | FALSE |
| Paics   | common | FALSE |
| Hoxd3   | common | TRUE  |
| Ndc1    | common | FALSE |
| Fam210b | common | FALSE |
| Sae1    | common | FALSE |
| Tfap2a  | common | TRUE  |
| Ccnb1   | common | FALSE |
| Gpc3    | common | FALSE |
| Utp20   | common | FALSE |
| E2f3    | common | TRUE  |
| Fn1     | common | FALSE |
| Hnrnpf  | common | FALSE |
| Tuba1b  | common | FALSE |
| Tcp1    | common | FALSE |
| Pus7    | common | FALSE |
| Uck2    | common | FALSE |
| Chek1   | common | FALSE |
| Tex10   | common | FALSE |
| Topbp1  | common | FALSE |
| Sephs1  | common | FALSE |
| Aif1l   | common | FALSE |
| Plagl2  | common | TRUE  |
| Tpx2    | common | FALSE |
| Lrig1   | common | FALSE |
| Pcdh18  | common | FALSE |
| Trim59  | common | FALSE |

|          |        |       |
|----------|--------|-------|
| Rcctb2   | common | FALSE |
| Pold1    | common | FALSE |
| Tcf12    | common | TRUE  |
| Xpo5     | common | FALSE |
| Mre11a   | common | FALSE |
| 2610318N | common | FALSE |
| Ddx3x    | common | FALSE |
| Ptges3   | common | FALSE |
| Tuba1c   | common | FALSE |
| Kif22    | common | TRUE  |
| Nup50    | common | FALSE |
| Nup155   | common | FALSE |
| Nup205   | common | FALSE |
| Gnl3     | common | FALSE |
| Pola1    | common | FALSE |
| ErbB3    | common | FALSE |
| Nup153   | common | FALSE |
| Chd1     | common | TRUE  |
| Aaas     | common | FALSE |
| Sufu     | common | FALSE |
| Rfwd3    | common | FALSE |
| Bend3    | common | FALSE |
| Pitrm1   | common | FALSE |
| Rsl1d1   | common | FALSE |
| Vcan     | common | FALSE |
| Nr2f6    | common | TRUE  |
| Prps2    | common | FALSE |
| Ifrd2    | common | FALSE |
| Adsl     | common | FALSE |
| Naa50    | common | FALSE |
| Knop1    | common | FALSE |
| Tacc3    | common | FALSE |
| Dtl      | common | TRUE  |
| Eef1d    | common | TRUE  |
| Mlec     | common | FALSE |
| Dhfr     | common | FALSE |
| Ilf3     | common | FALSE |
| Gcsh     | common | FALSE |
| Fam181b  | common | FALSE |
| Hnrnpk   | common | FALSE |
| Suclg2   | common | FALSE |
| Ncbp1    | common | FALSE |
| Fzd7     | common | FALSE |
| Smarcc1  | common | TRUE  |
| Zfp106   | common | FALSE |
| Lig1     | common | FALSE |
| Gpr125   | common | FALSE |
| Dbf4     | common | FALSE |
| Eif2s1   | common | FALSE |
| Prps1l3  | common | FALSE |

|          |        |       |
|----------|--------|-------|
| Nup37    | common | FALSE |
| Noc2l    | common | TRUE  |
| Galk1    | common | FALSE |
| Uba2     | common | FALSE |
| Ddx11    | common | FALSE |
| Srsf1    | common | FALSE |
| Dnaja2   | common | FALSE |
| Acsl4    | common | FALSE |
| Ikbkap   | common | FALSE |
| Bcar3    | common | FALSE |
| Klhl21   | common | FALSE |
| Cdt1     | common | FALSE |
| Mki67    | common | FALSE |
| Ddx18    | common | FALSE |
| Nup98    | common | FALSE |
| Mms22l   | common | FALSE |
| Nup85    | common | FALSE |
| Xpo4     | common | FALSE |
| Ppid     | common | FALSE |
| Chtf18   | common | FALSE |
| Spred1   | common | FALSE |
| Phgdh    | common | FALSE |
| 1700019D | common | FALSE |
| Tbl3     | common | FALSE |
| Psm2     | common | FALSE |
| Cdk2     | common | FALSE |
| Bora     | common | FALSE |
| Tk1      | common | FALSE |
| Cluh     | common | FALSE |
| Pno1     | common | FALSE |
| Rif1     | common | FALSE |
| Dek      | common | FALSE |
| Tbc1d1   | common | FALSE |
| Ado      | common | FALSE |
| Atad3a   | common | FALSE |
| Srsf7    | common | FALSE |
| Chtf8    | common | FALSE |
| Cdca8    | common | FALSE |
| Trim27   | common | FALSE |
| Pole2    | common | FALSE |
| Tyms     | common | FALSE |
| Agps     | common | FALSE |
| Exosc2   | common | FALSE |
| Tmc6     | common | FALSE |
| Ddx1     | common | FALSE |
| Dpy19l1  | common | FALSE |
| Eif3l    | common | FALSE |
| Mrps27   | common | FALSE |
| Ttf2     | common | FALSE |
| Shcbp1   | common | FALSE |

|          |        |       |
|----------|--------|-------|
| Ncaph    | common | FALSE |
| Ccna2    | common | FALSE |
| Thop1    | common | FALSE |
| Slc39a10 | common | FALSE |
| Rpa2     | common | FALSE |
| Elavl1   | common | FALSE |
| S1pr2    | common | FALSE |
| Sf1      | common | TRUE  |
| Hoxb2    | common | TRUE  |
| Nup160   | common | FALSE |
| Nudt5    | common | FALSE |
| Nup43    | common | FALSE |
| Brca2    | common | FALSE |
| Hnrnp11  | common | TRUE  |
| Pcna     | common | FALSE |
| Gpd2     | common | FALSE |
| Timeless | common | TRUE  |
| E2f4     | common | TRUE  |
| Ppif     | common | FALSE |
| Nol11    | common | FALSE |
| Srsf10   | common | FALSE |
| Eif5     | common | FALSE |
| Ints7    | common | FALSE |
| Hus1     | common | FALSE |
| Pds5a    | common | TRUE  |
| Rasa3    | common | FALSE |
| Dhx33    | common | FALSE |
| Prmt3    | common | FALSE |
| Ing5     | common | FALSE |
| Sf3a3    | common | FALSE |
| Strap    | common | FALSE |
| Anapc1   | common | FALSE |
| Ssr1     | common | FALSE |
| Rbpms    | common | FALSE |
| Sf3a1    | common | FALSE |
| Pwp1     | common | FALSE |
| Ncapd2   | common | FALSE |
| Rpl7l1   | common | FALSE |
| Sapcd2   | common | FALSE |
| Ipo9     | common | FALSE |
| Fhdc1    | common | FALSE |
| Txndc5   | common | FALSE |
| Nid2     | common | FALSE |
| Tfdp1    | common | TRUE  |
| Zc3hav1l | common | FALSE |
| Slbp     | common | FALSE |
| Paxip1   | common | TRUE  |
| Eif4e    | common | FALSE |
| Spg20    | common | FALSE |
| Cdca4    | common | FALSE |

|          |        |       |
|----------|--------|-------|
| Sall2    | common | TRUE  |
| Luzp1    | common | TRUE  |
| Polr1a   | common | FALSE |
| Zadh2    | common | FALSE |
| Kcnk5    | common | FALSE |
| Ddb1     | common | FALSE |
| Ruvbl1   | common | TRUE  |
| Gemin6   | common | FALSE |
| Hdlbp    | common | FALSE |
| Megf6    | common | FALSE |
| Usp37    | common | FALSE |
| Ahctf1   | common | TRUE  |
| Vrk1     | common | FALSE |
| Wdr5     | common | FALSE |
| Tmem132e | common | FALSE |
| Fam60a   | common | FALSE |
| Fubp1    | common | TRUE  |
| Snap23   | common | FALSE |
| Btaf1    | common | FALSE |
| Usp39    | common | TRUE  |
| Tgif2    | common | TRUE  |
| Cpsf2    | common | FALSE |
| Mdk      | common | FALSE |
| Dcp2     | common | FALSE |
| Rest     | common | TRUE  |
| Me2      | common | FALSE |
| Nono     | common | TRUE  |
| Actl6a   | common | FALSE |
| Eif4ebp1 | common | FALSE |
| Tbl1x    | common | FALSE |
| Nde1     | common | FALSE |
| E2f5     | common | TRUE  |
| Nmd3     | common | FALSE |
| Pola2    | common | FALSE |
| Wdr18    | common | FALSE |
| Carm1    | common | FALSE |
| Ranbp1   | common | FALSE |
| Dnph1    | common | FALSE |
| Nup62    | common | FALSE |
| Coa5     | common | FALSE |
| Cand2    | common | FALSE |
| Nme4     | common | FALSE |
| Tra2b    | common | FALSE |
| Lmnb1    | common | FALSE |
| Cnot1    | common | FALSE |
| Pdlim1   | common | FALSE |
| Pes1     | common | FALSE |
| Igf2bp3  | common | FALSE |
| Slc19a1  | common | FALSE |
| Pdk3     | common | FALSE |



|           |        |       |
|-----------|--------|-------|
| Ubfd1     | common | FALSE |
| Tpp2      | common | FALSE |
| Rpl3      | common | FALSE |
| Clns1a    | common | FALSE |
| Exosc6    | common | FALSE |
| Ezh2      | common | TRUE  |
| Smarca5   | common | TRUE  |
| Eif2s3x   | common | FALSE |
| Birc5     | common | FALSE |
| Kdelc1    | common | FALSE |
| Ubqln4    | common | FALSE |
| Scube1    | common | FALSE |
| Rbmxl1    | common | FALSE |
| 2410016O  | common | FALSE |
| Sulf2     | common | FALSE |
| Slc25a5   | common | FALSE |
| Hmga1     | common | TRUE  |
| Rqcd1     | common | FALSE |
| Haus3     | common | FALSE |
| Mns1      | common | FALSE |
| Smek1     | common | FALSE |
| Rbm38     | common | FALSE |
| Smc2      | common | FALSE |
| Tardbp    | common | FALSE |
| Saal1     | common | FALSE |
| Drosha    | common | FALSE |
| Cenpe     | common | FALSE |
| Prdx1     | common | FALSE |
| Pinx1     | common | FALSE |
| Nhp2      | common | FALSE |
| Usp1      | common | FALSE |
| Knstrn    | common | FALSE |
| Hoxb9     | common | TRUE  |
| 5730559C1 | common | FALSE |
| Naa40     | common | FALSE |
| Prkrir    | common | FALSE |
| Plekha8   | common | FALSE |
| Ddx56     | common | FALSE |
| Spats2    | common | TRUE  |
| Acot1     | common | FALSE |
| Pold3     | common | FALSE |
| Ccnb2     | common | FALSE |
| Nup133    | common | TRUE  |
| Cdc25a    | common | FALSE |
| Gtf2h3    | common | TRUE  |
| Evc2      | common | FALSE |
| Prodh     | common | FALSE |
| Myo10     | common | FALSE |
| Eef1g     | common | FALSE |
| Nudcd1    | common | FALSE |

|           |        |       |
|-----------|--------|-------|
| Tubb6     | common | FALSE |
| Cenph     | common | FALSE |
| Nmt1      | common | FALSE |
| Prkci     | common | FALSE |
| Ddx27     | common | FALSE |
| Snx18     | common | FALSE |
| Smchd1    | common | FALSE |
| Noc4l     | common | FALSE |
| Dhx15     | common | FALSE |
| Lig3      | common | FALSE |
| Rfc5      | common | FALSE |
| 2810004N2 | common | FALSE |
| Cdc27     | common | FALSE |
| Pkn2      | common | FALSE |
| Gpx3      | common | FALSE |
| 2810417H1 | common | FALSE |
| Phb2      | common | FALSE |
| Pvrl3     | common | FALSE |
| Polr2b    | common | FALSE |
| Fastkd2   | common | FALSE |
| Lrp4      | common | FALSE |
| Pdha1     | common | FALSE |
| Eed       | common | FALSE |
| Hspe1     | common | FALSE |
| Mtbp      | common | FALSE |
| Gmnn      | common | FALSE |
| Cnn2      | common | FALSE |
| Asnsd1    | common | FALSE |
| Adi1      | common | FALSE |
| Casp8ap2  | common | FALSE |
| Snrpa1    | common | FALSE |
| Msh2      | common | FALSE |
| Hspa14    | common | FALSE |
| Fign      | common | FALSE |
| Flrt3     | common | FALSE |
| Impdh2    | common | FALSE |
| D10Wsu10  | common | FALSE |
| Cdk1      | common | FALSE |
| Ranbp2    | common | FALSE |
| Sox13     | common | TRUE  |
| Snrnp40   | common | FALSE |
| Cpsf6     | common | FALSE |
| Exosc8    | common | FALSE |
| Thrap3    | common | FALSE |
| Dnajc2    | common | FALSE |
| Ppp4c     | common | FALSE |
| Nedd4     | common | FALSE |
| Ythdf3    | common | FALSE |
| Atad5     | common | FALSE |
| Stoml2    | common | FALSE |

|          |        |       |
|----------|--------|-------|
| Lsr      | common | FALSE |
| Phactr2  | common | FALSE |
| Spc24    | common | FALSE |
| Rae1     | common | FALSE |
| Dnajc9   | common | FALSE |
| Smpd4    | common | FALSE |
| Grk6     | common | FALSE |
| Lpar6    | common | FALSE |
| Itga5    | common | FALSE |
| Pus7l    | common | FALSE |
| Ubr7     | common | FALSE |
| Cenpa    | common | FALSE |
| Zfp266   | common | TRUE  |
| Hnrnpc   | common | TRUE  |
| Ppp2r5d  | common | FALSE |
| Fanca    | common | FALSE |
| Smg7     | common | FALSE |
| Mis18bp1 | common | FALSE |
| Cstf1    | common | FALSE |
| St13     | common | FALSE |
| Prpf4    | common | FALSE |
| Prpf31   | common | FALSE |
| Chd1l    | common | FALSE |
| Haglr    | common | FALSE |
| Trip10   | common | TRUE  |
| Khsrp    | common | FALSE |
| Heyl     | common | TRUE  |
| Ints2    | common | FALSE |
| Arf6     | common | FALSE |
| Mycbp    | common | FALSE |
| Mettl2   | common | FALSE |
| Zfp41    | common | TRUE  |
| Oat      | common | FALSE |
| Cdc23    | common | FALSE |
| Spcs3    | common | FALSE |
| Ung      | common | FALSE |
| Scaf11   | common | FALSE |
| Cntrl    | common | FALSE |
| Lrrc40   | common | FALSE |
| Eif4a3   | common | FALSE |
| Hmgb2    | common | TRUE  |
| Dus1l    | common | FALSE |
| Hmgn1    | common | FALSE |
| Bend4    | common | FALSE |
| Ncapd3   | common | FALSE |
| Eml4     | common | FALSE |
| Ninl     | common | FALSE |
| Amotl1   | common | FALSE |
| Zfp207   | common | TRUE  |
| Dnttip2  | common | FALSE |

|          |        |       |
|----------|--------|-------|
| Tipin    | common | FALSE |
| Cpsf3l   | common | FALSE |
| Rbm14    | common | FALSE |
| Lrwd1    | common | FALSE |
| Slc20a2  | common | FALSE |
| Xrcc6    | common | FALSE |
| Golt1b   | common | FALSE |
| Dzip1l   | common | FALSE |
| Tcf3     | common | TRUE  |
| Enpp2    | common | FALSE |
| Gapdh    | common | FALSE |
| Pgam1    | common | FALSE |
| Syncrip  | common | FALSE |
| Rgma     | common | FALSE |
| Ubap2l   | common | FALSE |
| Hoxa3    | common | TRUE  |
| Nip7     | common | FALSE |
| B3galnt2 | common | FALSE |
| Cdca3    | common | FALSE |
| Lmnb2    | common | FALSE |
| Map2k6   | common | FALSE |
| Atm      | common | FALSE |
| Rpl4     | common | FALSE |
| Tes      | common | FALSE |
| Cbx1     | common | FALSE |
| Rcbtb1   | common | FALSE |
| Msto1    | common | FALSE |
| Taf5l    | common | FALSE |
| Ptpn2    | common | FALSE |
| Adss     | common | FALSE |
| Cdc7     | common | FALSE |
| Hirip3   | common | TRUE  |
| Tcerg1   | common | FALSE |
| Exosc3   | common | TRUE  |
| Nbn      | common | FALSE |
| Zcchc3   | common | FALSE |
| Ddx52    | common | FALSE |
| Ugdh     | common | FALSE |
| Fzd2     | common | FALSE |
| Trp53    | common | TRUE  |
| H2afx    | common | FALSE |
| Iars2    | common | FALSE |
| Psmg1    | common | FALSE |
| Prpf3    | common | FALSE |
| Rnf144a  | common | FALSE |
| Cwc22    | common | FALSE |
| Zkscan17 | common | TRUE  |
| Phldb2   | common | FALSE |
| Tyms-ps  | common | FALSE |
| Tada2a   | common | FALSE |

|          |        |       |
|----------|--------|-------|
| Sox2     | common | TRUE  |
| Ckap2    | common | FALSE |
| Polr2h   | common | FALSE |
| Gpn1     | common | FALSE |
| Srsf3    | common | FALSE |
| Rbm15    | common | FALSE |
| Whsc1    | common | FALSE |
| Psrc1    | common | FALSE |
| Naa16    | common | FALSE |
| Wbp11    | common | FALSE |
| Snrnp200 | common | FALSE |
| Piezo1   | common | FALSE |
| Lmo4     | common | FALSE |
| Aen      | common | FALSE |
| Tgif1    | common | TRUE  |
| Csde1    | common | FALSE |
| Ttc23    | common | FALSE |
| Pi4k2b   | common | FALSE |
| Prpf8    | common | FALSE |
| Csrp2bp  | common | FALSE |
| Cenpk    | common | FALSE |
| Golm1    | common | FALSE |
| Tmem47   | common | FALSE |
| Cep192   | common | FALSE |
| Tfam     | common | TRUE  |
| Wdr76    | common | FALSE |
| Itga6    | common | FALSE |
| Papola   | common | FALSE |
| Pelp1    | common | FALSE |
| Uchl5    | common | FALSE |
| Ormdl1   | common | FALSE |
| Eif3c    | common | FALSE |
| Mif      | common | FALSE |
| Cdc16    | common | FALSE |
| Foxp4    | common | TRUE  |
| Lsm2     | common | FALSE |
| Cmtm7    | common | FALSE |
| Sox10    | common | TRUE  |
| D2Wsu81e | common | FALSE |
| Pdia5    | common | FALSE |
| Ngfr     | common | FALSE |
| Isy1     | common | FALSE |
| Eif2s2   | common | FALSE |
| Ptp4a2   | common | FALSE |
| Rfc1     | common | FALSE |
| Gatad2a  | common | FALSE |
| Vangl1   | common | FALSE |
| Stk24    | common | FALSE |
| Tead2    | common | TRUE  |
| Hnrnpdl  | common | FALSE |

|           |        |       |
|-----------|--------|-------|
| Nxt1      | common | FALSE |
| Sdha      | common | FALSE |
| Prim1     | common | FALSE |
| Dctpp1    | common | FALSE |
| Ppih      | common | FALSE |
| Emilin1   | common | FALSE |
| Rrp15     | common | FALSE |
| Llgl1     | common | FALSE |
| Nt5dc2    | common | FALSE |
| Casd1     | common | FALSE |
| Cdc42ep1  | common | FALSE |
| Ecd       | common | FALSE |
| Sart3     | common | FALSE |
| Dusp4     | common | FALSE |
| Kat2a     | common | TRUE  |
| Ide       | common | FALSE |
| Polr3e    | common | FALSE |
| Ola1      | common | FALSE |
| Gins2     | common | FALSE |
| Pigl      | common | FALSE |
| Ddx19a    | common | FALSE |
| Rsl24d1   | common | FALSE |
| Ube2f     | common | FALSE |
| Cherp     | common | FALSE |
| Nmral1    | common | TRUE  |
| Nudcd2    | common | FALSE |
| A1506816  | common | FALSE |
| A430005L1 | common | FALSE |
| Fubp3     | common | FALSE |
| Slc9a3r1  | common | FALSE |
| Klhdc4    | common | FALSE |
| Raver1    | common | FALSE |
| Elp2      | common | FALSE |
| Pop1      | common | FALSE |
| Rrp8      | common | FALSE |
| Supv3l1   | common | FALSE |
| 1700017BC | common | FALSE |
| Gas5      | common | FALSE |
| Slc35a4   | common | FALSE |
| Prim2     | common | FALSE |
| Gdpd5     | common | FALSE |
| Tsen15    | common | FALSE |
| Qser1     | common | FALSE |
| Qtrtd1    | common | FALSE |
| Zbtb1     | common | TRUE  |
| Utrn      | common | FALSE |
| Hsd11b2   | common | FALSE |
| Yars2     | common | FALSE |
| Psmc3ip   | common | FALSE |
| Inip      | common | FALSE |

|           |        |       |
|-----------|--------|-------|
| Rad50     | common | FALSE |
| Ephb4     | common | FALSE |
| Soat1     | common | FALSE |
| Xpo7      | common | FALSE |
| Zfp462    | common | FALSE |
| Tamm41    | common | FALSE |
| Snhg3     | common | FALSE |
| Fgd1      | common | FALSE |
| Brix1     | common | FALSE |
| Pms2      | common | FALSE |
| Fam206a   | common | FALSE |
| Prpf40a   | common | FALSE |
| Slmap     | common | FALSE |
| Tmtc3     | common | FALSE |
| Cenpp     | common | FALSE |
| Fam136a   | common | FALSE |
| Dhx8      | common | FALSE |
| Dock1     | common | FALSE |
| Dr1       | common | TRUE  |
| Zc3h18    | common | FALSE |
| Ddx47     | common | FALSE |
| Nmt2      | common | FALSE |
| Pabpc4    | common | FALSE |
| Metrn     | common | FALSE |
| Nr2f1     | common | TRUE  |
| Klhl13    | common | FALSE |
| Myh10     | common | FALSE |
| Dcaf13    | common | FALSE |
| Siva1     | common | FALSE |
| Tll12     | common | FALSE |
| Blmh      | common | FALSE |
| Taf1d     | common | FALSE |
| Setd8     | common | FALSE |
| Pdcd11    | common | TRUE  |
| Spon1     | common | FALSE |
| Cd3eap    | common | FALSE |
| Rfc4      | common | FALSE |
| Tsen54    | common | FALSE |
| Mapk14    | common | FALSE |
| Med14     | common | FALSE |
| Eif3m     | common | FALSE |
| Drg1      | common | FALSE |
| Homer3    | common | FALSE |
| Gsto1     | common | FALSE |
| Cks1b     | common | FALSE |
| Xrcc5     | common | FALSE |
| Poc1b     | common | FALSE |
| Rfc2      | common | TRUE  |
| 9430015G1 | common | FALSE |
| AI314180  | common | FALSE |

|          |        |       |
|----------|--------|-------|
| Fh1      | common | FALSE |
| Cdc34    | common | FALSE |
| Orc6     | common | FALSE |
| Rbm12    | common | FALSE |
| Med1     | common | FALSE |
| Ddx39b   | common | FALSE |
| Ints9    | common | FALSE |
| Foxn2    | common | TRUE  |
| Nacc1    | common | FALSE |
| Tubgcp4  | common | FALSE |
| Tsen2    | common | FALSE |
| Scaf4    | common | FALSE |
| Xrcc1    | common | TRUE  |
| Alg8     | common | FALSE |
| Nrf1     | common | TRUE  |
| Donson   | common | FALSE |
| Tshz1    | common | FALSE |
| Ppil1    | common | FALSE |
| Champ1   | common | FALSE |
| Tgs1     | common | FALSE |
| Slc20a1  | common | FALSE |
| Gid4     | common | FALSE |
| Hoxd4    | common | TRUE  |
| Phb      | common | FALSE |
| Ppp1r15b | common | FALSE |
| Bclaf1   | common | TRUE  |
| Zfp422   | common | TRUE  |
| Eri1     | common | FALSE |
| Ss18     | common | FALSE |
| Slc43a1  | common | FALSE |
| Nt5c3b   | common | FALSE |
| Sin3a    | common | TRUE  |
| Mettl1   | common | FALSE |
| Nup214   | common | FALSE |
| Shroom2  | common | FALSE |
| Pigm     | common | FALSE |
| Thumpd3  | common | FALSE |
| Pbdc1    | common | FALSE |
| U2af2    | common | FALSE |
| Tdp2     | common | FALSE |
| Txn1     | common | FALSE |
| Gtf2h4   | common | FALSE |
| Utp14a   | common | FALSE |
| Hnrnpab  | common | FALSE |
| Pxn      | common | FALSE |
| Trap1    | common | FALSE |
| Tom1l1   | common | FALSE |
| Rgs19    | common | FALSE |
| Cebpz    | common | TRUE  |
| Psmc6    | common | FALSE |



|           |        |       |
|-----------|--------|-------|
| Eif3i     | common | FALSE |
| Rlim      | common | FALSE |
| Utp6      | common | FALSE |
| Eif2d     | common | FALSE |
| Herc4     | common | FALSE |
| Trip6     | common | FALSE |
| Ythdf2    | common | FALSE |
| Usp28     | common | FALSE |
| Gabpa     | common | TRUE  |
| Gys1      | common | FALSE |
| Gnb2l1    | common | FALSE |
| Denr      | common | FALSE |
| Atf1      | common | TRUE  |
| Cops2     | common | FALSE |
| Morf4l2   | common | FALSE |
| Mrfap1    | common | FALSE |
| Fam199x   | common | FALSE |
| N4bp2     | common | FALSE |
| Tdp1      | common | FALSE |
| Psm5      | common | FALSE |
| Senp1     | common | FALSE |
| Lars      | common | FALSE |
| Mex3c     | common | TRUE  |
| Stxbp4    | common | FALSE |
| Cdk4      | common | FALSE |
| Chsy1     | common | FALSE |
| Terf1     | common | TRUE  |
| Hbb-y     | common | FALSE |
| Fkbp3     | common | FALSE |
| E130308A1 | common | FALSE |
| Zc3hc1    | common | FALSE |
| Bcat2     | common | FALSE |
| Fbxo30    | common | FALSE |
| Kif18b    | common | FALSE |
| Plcb3     | common | FALSE |
| Rangap1   | common | FALSE |
| Hnrnpd    | common | FALSE |
| Rfc3      | common | TRUE  |
| Ppfibp1   | common | FALSE |
| Bud13     | common | FALSE |
| Upf1      | common | FALSE |
| Mbd4      | common | TRUE  |
| Skap2     | common | FALSE |
| Rbm27     | common | FALSE |
| Cpsf4     | common | TRUE  |
| Pold2     | common | TRUE  |
| Csk       | common | FALSE |
| Trmt10a   | common | FALSE |
| Gtf3c4    | common | FALSE |
| Med17     | common | FALSE |

|          |        |       |
|----------|--------|-------|
| Zdhhc15  | common | TRUE  |
| Pbx2     | common | TRUE  |
| Ctdspl2  | common | FALSE |
| Bmp7     | common | FALSE |
| Fxr1     | common | FALSE |
| Cdk8     | common | FALSE |
| Azin1    | common | FALSE |
| Msh3     | common | FALSE |
| Ednrb    | common | FALSE |
| Fancm    | common | FALSE |
| Zw10     | common | FALSE |
| Rpap3    | common | FALSE |
| Ssr3     | common | FALSE |
| Megf10   | common | FALSE |
| Dhx38    | common | FALSE |
| Pus3     | common | FALSE |
| Rhobtb3  | common | FALSE |
| Vwa9     | common | FALSE |
| Nrarp    | common | FALSE |
| Gjc1     | common | FALSE |
| Mob1a    | common | FALSE |
| Mcat     | common | FALSE |
| Impact   | common | FALSE |
| Eif3e    | common | FALSE |
| Mapkapk2 | common | FALSE |
| Haus4    | common | FALSE |
| Tgm4     | common | FALSE |
| Fam53a   | common | FALSE |
| Phf5a    | common | FALSE |
| Daxx     | common | FALSE |
| Nme7     | common | FALSE |
| Baz1a    | common | FALSE |
| Plscr1   | common | FALSE |
| Tug1     | common | FALSE |
| Zzz3     | common | TRUE  |
| Metap1   | common | FALSE |
| Eaf1     | common | FALSE |
| Tmem55a  | common | FALSE |
| Ephb3    | common | FALSE |
| Ska2     | common | FALSE |
| Epb4.1l5 | common | FALSE |
| Nudt1    | common | FALSE |
| Fip1l1   | common | FALSE |
| Socs6    | common | FALSE |
| Gfer     | common | FALSE |
| Wapal    | common | FALSE |
| Msantd3  | common | FALSE |
| Lpin2    | common | FALSE |
| Bahcc1   | common | FALSE |
| Vcpkmt   | common | FALSE |

|           |        |       |
|-----------|--------|-------|
| Asxl1     | common | FALSE |
| Hoxb8     | common | TRUE  |
| Syde1     | common | FALSE |
| Pom121    | common | FALSE |
| Arcn1     | common | FALSE |
| Myh9      | common | FALSE |
| Thoc1     | common | FALSE |
| AY358078  | common | FALSE |
| Thumpd1   | common | FALSE |
| Fam111a   | common | FALSE |
| Tmem164   | common | FALSE |
| Manea     | common | FALSE |
| Asun      | common | FALSE |
| Ccdc43    | common | FALSE |
| Hcfc1     | common | TRUE  |
| Emg1      | common | FALSE |
| Ints8     | common | FALSE |
| Tubgcp2   | common | FALSE |
| Rbbp4     | common | FALSE |
| Nvl       | common | FALSE |
| Ears2     | common | FALSE |
| 6330549D2 | common | FALSE |
| Cnot11    | common | FALSE |
| Zfp334    | common | TRUE  |
| Plrg1     | common | FALSE |
| Map3k11   | common | FALSE |
| Pds5b     | common | FALSE |
| Rbm15b    | common | FALSE |
| Tars      | common | FALSE |
| Rbm28     | common | FALSE |
| Zdhhc6    | common | FALSE |
| Eef1a1    | common | FALSE |
| Trnt1     | common | FALSE |
| Lypla1    | common | FALSE |
| Ccar1     | common | FALSE |
| Pabpc4l   | common | FALSE |
| Hmgb3     | common | TRUE  |
| Rprd1b    | common | FALSE |
| Cks2      | common | FALSE |
| Hoxb3     | common | TRUE  |
| Cdyl      | common | FALSE |
| Mpdz      | common | FALSE |
| Prmt6     | common | FALSE |
| Stk4      | common | FALSE |
| Serp1     | common | FALSE |
| Xxylt1    | common | FALSE |
| 4930579G2 | common | FALSE |
| Gemin2    | common | FALSE |
| Rpp30     | common | FALSE |
| Elp3      | common | FALSE |

|           |        |       |
|-----------|--------|-------|
| Bccip     | common | FALSE |
| Bri3bp    | common | FALSE |
| Heg1      | common | FALSE |
| Sp1       | common | TRUE  |
| Gtf3c2    | common | TRUE  |
| Rpf1      | common | FALSE |
| Patz1     | common | TRUE  |
| E2f6      | common | TRUE  |
| Eef1b2    | common | FALSE |
| Anapc15   | common | FALSE |
| Cenpm     | common | FALSE |
| Snrpb     | common | FALSE |
| Tfb1m     | common | FALSE |
| Smn1      | common | FALSE |
| Papd4     | common | FALSE |
| Alg11     | common | FALSE |
| Tjp1      | common | FALSE |
| Mrpl1     | common | TRUE  |
| Peli2     | common | FALSE |
| Ppp2r2a   | common | FALSE |
| Bcl2l13   | common | FALSE |
| Itch      | common | FALSE |
| 2810006K2 | common | FALSE |
| Ints3     | common | FALSE |
| Apex1     | common | TRUE  |
| Pmf1      | common | FALSE |
| 1810009A1 | common | FALSE |
| Larp7     | common | FALSE |
| U2surp    | common | FALSE |
| Gm11974   | common | FALSE |
| Aco1      | common | TRUE  |
| Hnrnph2   | common | FALSE |
| Tti1      | common | FALSE |
| Appbp2    | common | FALSE |
| Ankrd49   | common | FALSE |
| Parg      | common | FALSE |
| Ubtd2     | common | FALSE |
| Nme6      | common | FALSE |
| Cd320     | common | FALSE |
| Alkbh1    | common | FALSE |
| Cul2      | common | FALSE |
| Usp7      | common | FALSE |
| Anp32a    | common | FALSE |
| Noa1      | common | FALSE |
| Atp13a3   | common | FALSE |
| Pstk      | common | FALSE |
| Prrc2c    | common | FALSE |
| Cdk7      | common | FALSE |
| Tex9      | common | FALSE |
| Phf10     | common | FALSE |

|          |        |       |
|----------|--------|-------|
| Psm12    | common | TRUE  |
| Plxna1   | common | FALSE |
| Gnpat    | common | FALSE |
| Lsg1     | common | FALSE |
| Pard6g   | common | FALSE |
| Dck      | common | FALSE |
| Sfpq     | common | TRUE  |
| Cyfp1    | common | FALSE |
| Exosc9   | common | FALSE |
| Stag2    | common | FALSE |
| Ccdc58   | common | FALSE |
| D15Ert62 | common | FALSE |
| Dicer1   | common | FALSE |
| Psm5     | common | FALSE |
| Ggct     | common | FALSE |
| Nae1     | common | FALSE |
| Fat1     | common | FALSE |
| Rxo4     | common | FALSE |
| Hmbs     | common | FALSE |
| Mesdc1   | common | FALSE |
| Pt1b     | common | FALSE |
| Polr2e   | common | FALSE |
| Lonp1    | common | FALSE |
| Psm10    | common | FALSE |
| Zcch10   | common | FALSE |
| Rnf138   | common | TRUE  |
| Prr11    | common | FALSE |
| Elovl2   | common | FALSE |
| Cactin   | common | FALSE |
| Map2k3   | common | FALSE |
| Pik3c2a  | common | FALSE |
| Thoc6    | common | FALSE |
| Pank2    | common | FALSE |
| Rpusd4   | common | FALSE |
| 2810025M | common | FALSE |
| Pcbp1    | common | FALSE |
| Pald1    | common | FALSE |
| Gtf2h2   | common | FALSE |
| Tmem39a  | common | FALSE |
| Cops4    | common | FALSE |
| Mrps2    | common | FALSE |
| Etv6     | common | TRUE  |
| Slitrk2  | common | FALSE |
| Ndufs1   | common | FALSE |
| Dhx9     | common | FALSE |
| Cpsf1    | common | FALSE |
| Tstd2    | common | FALSE |
| Ctbp2    | common | TRUE  |
| Hdac1    | common | TRUE  |
| Foxd3    | common | TRUE  |

|           |        |       |
|-----------|--------|-------|
| Gltf1     | common | FALSE |
| Dlg1      | common | FALSE |
| Iws1      | common | FALSE |
| Wbscr22   | common | FALSE |
| Rnf2      | common | FALSE |
| Rabl3     | common | FALSE |
| Top1      | common | FALSE |
| Srrt      | common | FALSE |
| Vcp       | common | FALSE |
| Lrp6      | common | FALSE |
| Isyna1    | common | FALSE |
| Slc4a7    | common | FALSE |
| Alyref    | common | FALSE |
| Pdgfc     | common | FALSE |
| Setdb1    | common | TRUE  |
| Katna1    | common | FALSE |
| Ago2      | common | FALSE |
| Mcmbp     | common | FALSE |
| Clint1    | common | FALSE |
| Gtf3c3    | common | FALSE |
| Smarcd1   | common | FALSE |
| Cpsf3     | common | FALSE |
| Cryz      | common | FALSE |
| Ddx46     | common | FALSE |
| Smu1      | common | FALSE |
| Esf1      | common | FALSE |
| Mrpl45    | common | FALSE |
| Wrb       | common | FALSE |
| Sox8      | common | TRUE  |
| Heatr5a   | common | FALSE |
| Ctu2      | common | FALSE |
| Mical1    | common | FALSE |
| 1110038B1 | common | FALSE |
| Alkbh5    | common | FALSE |
| Pmpca     | common | FALSE |
| Rabggtb   | common | FALSE |
| Zfp217    | common | TRUE  |
| Cpxm1     | common | FALSE |
| Psm3      | common | FALSE |
| Hoxb7     | common | TRUE  |
| Rbm10     | common | FALSE |
| Fam149a   | common | FALSE |
| Ssb       | common | FALSE |
| Slc12a7   | common | FALSE |
| Mrps22    | common | FALSE |
| Gemin8    | common | FALSE |
| Sep-10    | common | FALSE |
| Dusp12    | common | FALSE |
| Rps2      | common | FALSE |
| Topors    | common | TRUE  |

|          |        |       |
|----------|--------|-------|
| Ddx54    | common | FALSE |
| Pacs1    | common | FALSE |
| Pcca     | common | FALSE |
| Sde2     | common | FALSE |
| Mccc2    | common | FALSE |
| AI597479 | common | FALSE |
| Baz1b    | common | FALSE |
| Senp3    | common | FALSE |
| Mad1l1   | common | FALSE |
| Rbms1    | common | TRUE  |
| Zscan12  | common | TRUE  |
| Ube2d3   | common | FALSE |
| Farp1    | common | FALSE |
| Mtr      | common | FALSE |
| Rpsa     | common | FALSE |
| Dera     | common | FALSE |
| Sf3b4    | common | FALSE |
| Chst14   | common | FALSE |
| Dsn1     | common | FALSE |
| Scrn2    | common | FALSE |
| Hif1a    | common | TRUE  |
| Eif2a    | common | FALSE |
| Cul4a    | common | FALSE |
| Nipa2    | common | FALSE |
| Polr3f   | common | FALSE |
| Polr3d   | common | FALSE |
| Decr1    | common | FALSE |
| Nhp2l1   | common | FALSE |
| Tulp3    | common | FALSE |
| Crk      | common | FALSE |
| Cdc14b   | common | FALSE |
| Pggt1b   | common | FALSE |
| Zranb2   | common | FALSE |
| Casp2    | common | FALSE |
| Erc3     | common | FALSE |
| Gabpb2   | common | FALSE |
| Mkln1    | common | FALSE |
| Itga4    | common | FALSE |
| Taf2     | common | FALSE |
| Cltc     | common | FALSE |
| Mrps30   | common | FALSE |
| Dld      | common | FALSE |
| Adam12   | common | FALSE |
| Tirap    | common | FALSE |
| Mta1     | common | FALSE |
| Wls      | common | FALSE |
| Exosc5   | common | FALSE |
| Uri1     | common | FALSE |
| Snw1     | common | FALSE |
| Celsr1   | common | FALSE |

|           |        |       |
|-----------|--------|-------|
| Cep76     | common | FALSE |
| Haus1     | common | FALSE |
| Cul3      | common | FALSE |
| Matr3     | common | FALSE |
| 2700094K1 | common | FALSE |
| Gzf1      | common | TRUE  |
| Thoc3     | common | FALSE |
| Ythdf1    | common | FALSE |
| Ehmt1     | common | FALSE |
| Sympk     | common | FALSE |
| Abcg2     | common | FALSE |
| 2900097C1 | common | FALSE |
| Arih2     | common | FALSE |
| Ubap2     | common | FALSE |
| Ampd2     | common | FALSE |
| Alad      | common | FALSE |
| Eya3      | common | FALSE |
| Taf6      | common | FALSE |
| Scft1     | common | FALSE |
| PsmD7     | common | FALSE |
| Galnt1    | common | FALSE |
| Brd7      | common | FALSE |
| Mief1     | common | TRUE  |
| Rimklb    | common | FALSE |
| Utp3      | common | FALSE |
| Axin1     | common | FALSE |
| Mknk2     | common | FALSE |
| Gpn2      | common | FALSE |
| Nrp1      | common | FALSE |
| Dhx16     | common | FALSE |
| Ttc9c     | common | FALSE |
| Lsm12     | common | FALSE |
| A130010J1 | common | FALSE |
| Orc4      | common | FALSE |
| Prdm5     | common | TRUE  |
| Tsr2      | common | FALSE |
| Hif1an    | common | FALSE |
| Cbl       | common | FALSE |
| Mlh1      | common | FALSE |
| Nfya      | common | TRUE  |
| Rdx       | common | FALSE |
| Nelfa     | common | TRUE  |
| Zfp518b   | common | FALSE |
| Adprhl2   | common | FALSE |
| 4930503L1 | common | FALSE |
| Sars2     | common | FALSE |
| Adpgk     | common | FALSE |
| E130309DC | common | FALSE |
| Erlin1    | common | FALSE |
| Kpna4     | common | FALSE |



|           |        |       |
|-----------|--------|-------|
| Hba-x     | common | FALSE |
| Aldh16a1  | common | FALSE |
| Sod1      | common | TRUE  |
| Ppp1r8    | common | FALSE |
| Dhx35     | common | FALSE |
| Chd7      | common | FALSE |
| Prkab1    | common | FALSE |
| Atl2      | common | FALSE |
| Cep68     | common | FALSE |
| D830031N  | common | FALSE |
| Glyr1     | common | FALSE |
| Taf1      | common | TRUE  |
| Ppie      | common | FALSE |
| Hmcn1     | common | FALSE |
| Hip1      | common | FALSE |
| Rcc2      | common | FALSE |
| Chrna4    | common | FALSE |
| Slc4a2    | common | FALSE |
| Fancl     | common | FALSE |
| Dtymk     | common | FALSE |
| Ddx41     | common | FALSE |
| Nthl1     | common | FALSE |
| Smg8      | common | FALSE |
| Orc3      | common | FALSE |
| Plp1      | common | FALSE |
| Coq4      | common | FALSE |
| Gli2      | common | TRUE  |
| Gtf2e2    | common | FALSE |
| Ywhaq     | common | FALSE |
| Pspc1     | common | FALSE |
| Mta2      | common | FALSE |
| 2610507B1 | common | FALSE |
| Tsfm      | common | FALSE |
| Dse       | common | FALSE |
| Tubgcp3   | common | FALSE |
| Trim62    | common | FALSE |
| Pgam5     | common | FALSE |
| Mapk6     | common | FALSE |
| Parn      | common | FALSE |
| Tmx3      | common | FALSE |
| Cab39l    | common | FALSE |
| Rtcb      | common | FALSE |
| Cdc14a    | common | FALSE |
| Preli2    | common | FALSE |
| Sec23ip   | common | FALSE |
| Pum2      | common | FALSE |
| Polr3c    | common | FALSE |
| Cdk12     | common | FALSE |
| Spidr     | common | FALSE |
| Mtfr1     | common | FALSE |

|         |        |       |
|---------|--------|-------|
| Poc1a   | common | FALSE |
| Ndufaf4 | common | FALSE |
| Rplp0   | common | FALSE |
| Arl6ip6 | common | FALSE |
| Kirrel  | common | FALSE |
| Taf6l   | common | FALSE |
| Pgd     | common | FALSE |
| Pdf     | common | FALSE |
| Nras    | common | FALSE |
| Nufip2  | common | FALSE |
| Zfp26   | common | FALSE |
| Rpp14   | common | FALSE |
| Trmt1   | common | TRUE  |
| Lrrfip1 | common | TRUE  |
| Fam178a | common | FALSE |
| Hdac3   | common | TRUE  |
| Elp4    | common | FALSE |
| Ctcf    | common | TRUE  |
| Shrnp70 | common | TRUE  |
| Trub2   | common | FALSE |
| Unc119  | common | FALSE |
| Nin     | common | FALSE |
| Cotl1   | common | FALSE |
| Psmc4   | common | FALSE |
| Tpr     | common | FALSE |
| Pum1    | common | FALSE |
| Ankrd26 | common | FALSE |
| Polr2d  | common | FALSE |
| Qrich1  | common | FALSE |
| Atg5    | common | FALSE |
| Zfp961  | common | TRUE  |
| Parp2   | common | FALSE |
| Lfng    | common | FALSE |
| Cnnm4   | common | FALSE |
| Ndufaf2 | common | FALSE |
| Raly    | common | FALSE |
| Oard1   | common | FALSE |
| Prkra   | common | FALSE |
| Psme4   | common | FALSE |
| Rps6    | common | FALSE |
| Ltn1    | common | FALSE |
| Specc1  | common | FALSE |
| Obfc1   | common | FALSE |
| Gale    | common | FALSE |
| Fbxw8   | common | FALSE |
| Smg5    | common | FALSE |
| Smim15  | common | FALSE |
| Apaf1   | common | FALSE |
| Polr1c  | common | FALSE |
| Tmem248 | common | FALSE |

|           |        |       |
|-----------|--------|-------|
| Dpp3      | common | FALSE |
| Yeats2    | common | FALSE |
| Anp32e    | common | FALSE |
| Tsku      | common | FALSE |
| Repin1    | common | FALSE |
| Ube2v1    | common | TRUE  |
| Maml1     | common | FALSE |
| Sco1      | common | FALSE |
| Leo1      | common | FALSE |
| Rilpl1    | common | FALSE |
| Rnf4      | common | FALSE |
| Sub1      | common | FALSE |
| Pdpn      | common | FALSE |
| Asf1a     | common | FALSE |
| 2310022A1 | common | FALSE |
| Erh       | common | FALSE |
| Mtf2      | common | FALSE |
| Coro1c    | common | FALSE |
| Rpl15     | common | FALSE |
| Nck1      | common | FALSE |
| Mier3     | common | FALSE |
| Ptrh2     | common | FALSE |
| N4bp1     | common | FALSE |
| Zfx       | common | TRUE  |
| Ext1      | common | FALSE |
| Ctc1      | common | FALSE |
| Polr2a    | common | FALSE |
| Aqr       | common | FALSE |
| Cacul1    | common | FALSE |
| Nudt7     | common | FALSE |
| Pigq      | common | FALSE |
| Fam212a   | common | FALSE |
| Glce      | common | FALSE |
| Edc3      | common | FALSE |
| Phrf1     | common | FALSE |
| Nfxl1     | common | FALSE |
| Abl1      | common | TRUE  |
| H2afz     | common | TRUE  |
| Atr       | common | FALSE |
| Zfp213    | common | TRUE  |
| Hdgfrp2   | common | FALSE |
| Lrrcc1    | common | FALSE |
| Mettl3    | common | TRUE  |
| 6030458C1 | common | FALSE |
| Fut8      | common | FALSE |
| Hnrnpr    | common | FALSE |
| Lasp1     | common | FALSE |
| Rars2     | common | FALSE |
| Vkorc1l1  | common | FALSE |
| Ikzf5     | common | TRUE  |

|          |        |       |
|----------|--------|-------|
| Tmem123  | common | FALSE |
| Mrpl3    | common | FALSE |
| Zfp322a  | common | TRUE  |
| Tnpo1    | common | FALSE |
| Ccdc77   | common | FALSE |
| Tank     | common | FALSE |
| Hes1     | common | TRUE  |
| Cnot3    | common | TRUE  |
| Acad9    | common | FALSE |
| Rreb1    | common | TRUE  |
| Sec23b   | common | FALSE |
| Nfyb     | common | TRUE  |
| Rbbp8    | common | FALSE |
| Eif1ax   | common | FALSE |
| Tgfbr1   | common | FALSE |
| Pnn      | common | FALSE |
| Foxred1  | common | FALSE |
| Cd2ap    | common | FALSE |
| Gpam     | common | TRUE  |
| Glo1     | common | FALSE |
| Ndufaf1  | common | FALSE |
| Nhlrc2   | common | FALSE |
| Sntb2    | common | FALSE |
| Mrps35   | common | FALSE |
| Riok2    | common | FALSE |
| Gfra1    | common | FALSE |
| Smc5     | common | FALSE |
| Csnk2a1  | common | FALSE |
| Sppl2b   | common | FALSE |
| Dvl2     | common | FALSE |
| Mier1    | common | FALSE |
| Rnft1    | common | FALSE |
| Sf3b1    | common | TRUE  |
| Capza1   | common | FALSE |
| Rfx7     | common | TRUE  |
| Dhx40    | common | FALSE |
| Mphosph9 | common | FALSE |
| Hmgxb4   | common | FALSE |
| Nrm      | common | FALSE |
| Hoxa5    | common | TRUE  |
| Adh5     | common | FALSE |
| Rnf26    | common | FALSE |
| Pkp4     | common | FALSE |
| Ash2l    | common | TRUE  |
| Alg6     | common | FALSE |
| Rps3a1   | common | FALSE |
| Snhg7    | common | FALSE |
| Cops7b   | common | FALSE |
| Prpf38a  | common | FALSE |
| Maml2    | common | FALSE |

|           |        |       |
|-----------|--------|-------|
| Nsmce4a   | common | FALSE |
| Agfg1     | common | FALSE |
| Cep57     | common | FALSE |
| Zrsr2     | common | FALSE |
| Ctnna1    | common | FALSE |
| Gcn11l    | common | FALSE |
| Pbx3      | common | TRUE  |
| Rbm17     | common | TRUE  |
| Zfp710    | common | TRUE  |
| Prr5      | common | FALSE |
| Tubg1     | common | FALSE |
| 9430008CC | common | FALSE |
| Mettl6    | common | FALSE |
| Rnf40     | common | FALSE |
| Dnajc10   | common | FALSE |
| Wdr92     | common | FALSE |
| Hnrnpa2b1 | common | FALSE |
| Uchl4     | common | FALSE |
| Eif2ak4   | common | FALSE |
| Qars      | common | FALSE |
| Smndc1    | common | FALSE |
| Klhl22    | common | FALSE |
| Atpaf2    | common | FALSE |
| Mpg       | common | FALSE |
| Myl9      | common | FALSE |
| Txlna     | common | FALSE |
| Ccnh      | common | FALSE |
| Dpy19l3   | common | FALSE |
| Tnks2     | common | FALSE |
| Dscr3     | common | FALSE |
| Snhg1     | common | FALSE |
| Fance     | common | FALSE |
| Cnot10    | common | FALSE |
| Plin2     | common | FALSE |
| Man1a2    | common | FALSE |
| Mpp5      | common | FALSE |
| Pfn1      | common | FALSE |
| Psma1     | common | FALSE |
| E430025E2 | common | FALSE |
| Emc8      | common | FALSE |
| Ift74     | common | FALSE |
| Sumo3     | common | FALSE |
| Dusp7     | common | FALSE |
| Zfp629    | common | TRUE  |
| Ranbp3    | common | FALSE |
| Pat1      | common | FALSE |
| Nutf2     | common | FALSE |
| Kif7      | common | FALSE |
| Ssfa2     | common | FALSE |
| Bmpr1a    | common | FALSE |

|           |        |       |
|-----------|--------|-------|
| Yeats4    | common | TRUE  |
| Nus1      | common | FALSE |
| Gdi2      | common | FALSE |
| Mios      | common | TRUE  |
| Rbms2     | common | FALSE |
| Tmed5     | common | FALSE |
| Jmjd4     | common | FALSE |
| Qk        | common | FALSE |
| Rin2      | common | FALSE |
| Pacsin2   | common | FALSE |
| Cstf3     | common | FALSE |
| Dpp8      | common | FALSE |
| Caap1     | common | FALSE |
| Zfp507    | common | TRUE  |
| Fbxl14    | common | FALSE |
| Marcksl1  | common | FALSE |
| Stk3      | common | FALSE |
| Desi2     | common | FALSE |
| Eif4enif1 | common | FALSE |
| Fadd      | common | FALSE |
| Usp3      | common | FALSE |
| Uhrf2     | common | FALSE |
| C330018D2 | common | FALSE |
| Igfbp2    | common | FALSE |
| Cdc73     | common | FALSE |
| Bckdk     | common | FALSE |
| Dancr     | common | FALSE |
| Katnbl1   | common | FALSE |
| Nit2      | common | FALSE |
| Wdr11     | common | FALSE |
| Sos1      | common | FALSE |
| Ppp6r3    | common | FALSE |
| Bap1      | common | FALSE |
| Tyw5      | common | FALSE |
| 1200014J1 | common | FALSE |
| Wdr61     | common | FALSE |
| Nudt21    | common | FALSE |
| Tcf7l1    | common | TRUE  |
| Ccdc137   | common | FALSE |
| Pbx1      | common | TRUE  |
| Rnmt      | common | FALSE |
| Slc25a37  | common | FALSE |
| Ptpn14    | common | FALSE |
| Pgm1      | common | FALSE |
| Pycrl     | common | FALSE |
| Tpm4      | common | FALSE |
| Poldip3   | common | FALSE |
| Rpl27a    | common | FALSE |
| Ibtk      | common | FALSE |
| Zdhhc5    | common | TRUE  |

|           |        |       |
|-----------|--------|-------|
| Qrs11     | common | FALSE |
| Senp5     | common | FALSE |
| Samhd1    | common | FALSE |
| Cox18     | common | FALSE |
| Zmynd8    | common | FALSE |
| Psip1     | common | FALSE |
| Prkd3     | common | FALSE |
| Arpp19    | common | FALSE |
| 1810055G  | common | FALSE |
| Med8      | common | FALSE |
| Ppap2c    | common | FALSE |
| Smim12    | common | FALSE |
| Phf13     | common | FALSE |
| Psmg2     | common | FALSE |
| Osbpl1a   | common | FALSE |
| Rabl6     | common | FALSE |
| Actn4     | common | FALSE |
| Uba3      | common | FALSE |
| Kctd20    | common | FALSE |
| Mrps9     | common | FALSE |
| Akap8     | common | FALSE |
| Rpl12     | common | FALSE |
| Acad8     | common | FALSE |
| Zbed4     | common | FALSE |
| Mrps25    | common | TRUE  |
| Olfml3    | common | FALSE |
| Mllt1     | common | FALSE |
| Crnk1     | common | FALSE |
| B3glct    | common | FALSE |
| Nelfe     | common | TRUE  |
| Stk40     | common | FALSE |
| Taf12     | common | FALSE |
| Rps27a    | common | FALSE |
| Acp1      | common | FALSE |
| Tomm5     | common | FALSE |
| Ice1      | common | FALSE |
| Magoh     | common | TRUE  |
| 9530082P2 | common | FALSE |
| Ccdc25    | common | TRUE  |
| Itgb3bp   | common | FALSE |
| Sp3       | common | TRUE  |
| Foxo4     | common | TRUE  |
| Adnp2     | common | TRUE  |
| Zfp518a   | common | FALSE |
| Trim32    | common | FALSE |
| Ap1g1     | common | FALSE |
| Fam49b    | common | FALSE |
| Arl14ep   | common | FALSE |
| Tmem216   | common | FALSE |
| Eif2ak1   | common | FALSE |

|          |        |       |
|----------|--------|-------|
| Dhx36    | common | TRUE  |
| Strada   | common | FALSE |
| Lzic     | common | FALSE |
| Mesdc2   | common | FALSE |
| Usp47    | common | FALSE |
| Gtf3c6   | common | FALSE |
| Scap     | common | FALSE |
| Plcg1    | common | FALSE |
| Smg1     | common | FALSE |
| Ppfia1   | common | FALSE |
| Fam118a  | common | FALSE |
| Tm9sf3   | common | FALSE |
| Srp68    | common | FALSE |
| Pde12    | common | FALSE |
| Med16    | common | FALSE |
| Eif1ad   | common | FALSE |
| Mcm3ap   | common | FALSE |
| Stt3a    | common | FALSE |
| Naca     | common | FALSE |
| Drg2     | common | FALSE |
| Mut      | common | FALSE |
| Suz12    | common | TRUE  |
| Zfp516   | common | TRUE  |
| Slc35a1  | common | FALSE |
| Fam210a  | common | FALSE |
| Rara     | common | TRUE  |
| Aven     | common | TRUE  |
| Tspan12  | common | FALSE |
| Dcp1a    | common | FALSE |
| Sh3rf1   | common | FALSE |
| Elmsan1  | common | FALSE |
| Nxn      | common | FALSE |
| Zfp275   | common | TRUE  |
| Kdm6a    | common | FALSE |
| Snrpd1   | common | FALSE |
| Mfsd1    | common | FALSE |
| Lpar3    | common | FALSE |
| Yy1      | common | TRUE  |
| 18100320 | common | FALSE |
| Tmem165  | common | FALSE |
| Spire1   | common | FALSE |
| Med6     | common | FALSE |
| Limd2    | common | FALSE |
| Anapc7   | common | FALSE |
| Ppp4r2   | common | FALSE |
| Hs2st1   | common | FALSE |
| Chordc1  | common | FALSE |
| Tysnd1   | common | FALSE |
| Rab13    | common | FALSE |
| Zc3h4    | common | FALSE |



|           |        |       |
|-----------|--------|-------|
| Arid2     | common | FALSE |
| Pxdn      | common | FALSE |
| Zfp317    | common | TRUE  |
| Dcun1d4   | common | FALSE |
| Memo1     | common | FALSE |
| Scly      | common | FALSE |
| Szrd1     | common | FALSE |
| Ppm1m     | common | FALSE |
| Thyn1     | common | FALSE |
| Kcmf1     | common | FALSE |
| Flna      | common | FALSE |
| Gm6524    | common | FALSE |
| Rnaseh2a  | common | FALSE |
| Zfp574    | common | TRUE  |
| Wtip      | common | FALSE |
| Lsm14a    | common | FALSE |
| Myrf      | common | TRUE  |
| Vangl2    | common | FALSE |
| Id3       | common | FALSE |
| Rhot2     | common | FALSE |
| Aldh7a1   | common | FALSE |
| Nploc4    | common | FALSE |
| Mtmr2     | common | FALSE |
| Taf9      | common | TRUE  |
| Usp6nl    | common | FALSE |
| Psmg3     | common | FALSE |
| Papss1    | common | FALSE |
| Rps23     | common | FALSE |
| Usp40     | common | FALSE |
| Dcbld1    | common | FALSE |
| Exosc10   | common | FALSE |
| Ints1     | common | FALSE |
| Smarcad1  | common | FALSE |
| Asb4      | common | FALSE |
| Ppil3     | common | FALSE |
| A230046KC | common | FALSE |
| Kif2a     | common | FALSE |
| Wasf1     | common | FALSE |
| Pycr2     | common | FALSE |
| Pcm1      | common | FALSE |
| Zbtb14    | common | TRUE  |
| Itpripl1  | common | FALSE |
| Snx33     | common | FALSE |
| Lsm8      | common | FALSE |
| Mrpl15    | common | FALSE |
| Dagla     | common | FALSE |
| Evc       | common | FALSE |
| Abt1      | common | FALSE |
| Cnot2     | common | FALSE |
| Huwe1     | common | FALSE |

|           |        |       |
|-----------|--------|-------|
| Lman1     | common | FALSE |
| Bcl2l12   | common | FALSE |
| Pigf      | common | FALSE |
| Ube2g1    | common | FALSE |
| Zcchc8    | common | FALSE |
| Eif5b     | common | FALSE |
| Ing3      | common | TRUE  |
| Dph7      | common | FALSE |
| Tlk1      | common | FALSE |
| Fam129b   | common | FALSE |
| Rap2c     | common | FALSE |
| Reep4     | common | FALSE |
| Polr1d    | common | FALSE |
| Prpsap1   | common | FALSE |
| Prpf39    | common | FALSE |
| Mavs      | common | FALSE |
| Pole4     | common | TRUE  |
| Rbl1      | common | FALSE |
| Tmem167   | common | FALSE |
| 2310033PC | common | FALSE |
| Mrpl50    | common | FALSE |
| Cggbp1    | common | FALSE |
| Poll      | common | FALSE |
| Ubp1      | common | TRUE  |
| Casp8     | common | FALSE |
| Snord96a  | common | FALSE |
| Ccz1      | common | FALSE |
| Snd1      | common | TRUE  |
| Hbs1l     | common | FALSE |
| Ttc32     | common | FALSE |
| Plcd1     | common | FALSE |
| LOC102634 | common | FALSE |
| Kitl      | common | FALSE |
| Srsf4     | common | FALSE |
| Ptk7      | common | FALSE |
| Smek2     | common | FALSE |
| Npat      | common | FALSE |
| 2410004NC | common | FALSE |
| Ptprg     | common | FALSE |
| Nap1l4    | common | FALSE |
| Ktn1      | common | FALSE |
| Prpf4b    | common | FALSE |
| Ppm1f     | common | FALSE |
| Rhot1     | common | FALSE |
| Zfp260    | common | TRUE  |
| Rnf8      | common | FALSE |
| Cdc37     | common | FALSE |
| Ston2     | common | FALSE |
| Pdzd8     | common | FALSE |
| Tyw1      | common | FALSE |

|           |        |       |
|-----------|--------|-------|
| Opa1      | common | FALSE |
| Ugcg      | common | FALSE |
| Ubr5      | common | FALSE |
| Tcf20     | common | FALSE |
| Msi1      | common | TRUE  |
| Josd1     | common | FALSE |
| 1110008F1 | common | FALSE |
| Akap10    | common | FALSE |
| Arhgap5   | common | FALSE |
| Rcn1      | common | FALSE |
| Mitd1     | common | FALSE |
| Hnrnpul1  | common | FALSE |
| Rnf149    | common | FALSE |
| Ovca2     | common | FALSE |
| Mrps7     | common | FALSE |
| Tyro3     | common | FALSE |
| Zfp105    | common | TRUE  |
| Hyal2     | common | FALSE |
| Mum1      | common | FALSE |
| Smc6      | common | FALSE |
| Ccm2      | common | FALSE |
| 2810474O1 | common | FALSE |
| Nfatc3    | common | TRUE  |
| Snrpd3    | common | FALSE |
| Rpap1     | common | FALSE |
| Mrpl44    | common | FALSE |
| Ddx42     | common | FALSE |
| Gcnt1     | common | FALSE |
| Zscan22   | common | TRUE  |
| Rpl7      | common | FALSE |
| Tada1     | common | FALSE |
| Hsf1      | common | TRUE  |
| Zfp35     | common | TRUE  |
| Zc3h15    | common | FALSE |
| Ube4b     | common | FALSE |
| Rhno1     | common | FALSE |
| Osbpl11   | common | FALSE |
| Usb1      | common | FALSE |
| Rps11     | common | FALSE |
| G6pdx     | common | FALSE |
| Tspan18   | common | FALSE |
| Bloc1s6   | common | FALSE |
| Arl5a     | common | FALSE |
| Ccny      | common | FALSE |
| Bzw2      | common | FALSE |
| Atoh8     | common | TRUE  |
| Nxf1      | common | FALSE |
| Ints6     | common | FALSE |
| Mplkip    | common | FALSE |
| Ergic1    | common | FALSE |

|           |        |       |
|-----------|--------|-------|
| Usp4      | common | FALSE |
| Rnf44     | common | FALSE |
| Fiz1      | common | TRUE  |
| Msl2      | common | FALSE |
| Erb2ip    | common | FALSE |
| Igfbp4    | common | FALSE |
| Usp21     | common | FALSE |
| Lyplal1   | common | FALSE |
| Sh3kbp1   | common | FALSE |
| Fbxo22    | common | FALSE |
| Irf2bp1   | common | FALSE |
| Tgds      | common | FALSE |
| Rad23a    | common | FALSE |
| Bak1      | common | FALSE |
| Edc4      | common | FALSE |
| B4galt1   | common | FALSE |
| Odf2      | common | FALSE |
| Rassf7    | common | FALSE |
| Gramd3    | common | FALSE |
| Frmd8     | common | FALSE |
| Tfip11    | common | FALSE |
| Aagab     | common | FALSE |
| Dnajc13   | common | FALSE |
| Hoxb5     | common | TRUE  |
| Srgap2    | common | FALSE |
| Arhgap17  | common | FALSE |
| Adcy6     | common | FALSE |
| Aggf1     | common | TRUE  |
| Rap2b     | common | FALSE |
| Rad17     | common | FALSE |
| Clcn5     | common | FALSE |
| Aifm1     | common | FALSE |
| Polr3k    | common | FALSE |
| Srsf9     | common | FALSE |
| Ppp2ca    | common | FALSE |
| Rnf115    | common | FALSE |
| Ppig      | common | FALSE |
| 1110059E2 | common | FALSE |
| Ankle2    | common | FALSE |
| Yme1l1    | common | FALSE |
| Gm5801.1  | common | FALSE |
| Oma1      | common | FALSE |
| Nsmaf     | common | FALSE |
| Dcaf17    | common | FALSE |
| Pusl1     | common | FALSE |
| Nqo2      | common | FALSE |
| Htra2     | common | FALSE |
| Bach2     | common | TRUE  |
| Vps8      | common | FALSE |
| Igsf3     | common | FALSE |

|           |        |       |
|-----------|--------|-------|
| Fam96a    | common | FALSE |
| Ints12    | common | FALSE |
| Map3k7    | common | FALSE |
| Gtpbp1    | common | TRUE  |
| Copb1     | common | FALSE |
| Mrpl16    | common | FALSE |
| Zfp277    | common | FALSE |
| Rcor2     | common | FALSE |
| Atf7ip    | common | FALSE |
| Hars      | common | FALSE |
| Cbx3      | common | TRUE  |
| Cdc40     | common | FALSE |
| Hscb      | common | FALSE |
| Usp9x     | common | FALSE |
| Trpm7     | common | FALSE |
| Nfyc      | common | TRUE  |
| Pvrl2     | common | FALSE |
| Tram1     | common | FALSE |
| Tshz2     | common | FALSE |
| Prpf6     | common | FALSE |
| Dpp9      | common | FALSE |
| Rnf130    | common | FALSE |
| Gm5088    | common | FALSE |
| Rad54l2   | common | FALSE |
| Fndc4     | common | FALSE |
| Hvcn1     | common | FALSE |
| Fbxo38    | common | FALSE |
| Idh2      | common | FALSE |
| Klhl9     | common | FALSE |
| Dbt       | common | FALSE |
| Efna4     | common | FALSE |
| Cecr5     | common | FALSE |
| Adamts4   | common | FALSE |
| Cln5      | common | FALSE |
| Gxylt1    | common | FALSE |
| Tacc1     | common | FALSE |
| B230219D2 | common | FALSE |
| Maea      | common | FALSE |
| Cstf2t    | common | FALSE |
| Spsb1     | common | FALSE |
| Abhd13    | common | FALSE |
| Rxra      | common | TRUE  |
| Nacc2     | common | FALSE |
| Traf7     | common | FALSE |
| Scaf8     | common | FALSE |
| Sep-02    | common | FALSE |
| Rprd1a    | common | FALSE |
| Ublcp1    | common | FALSE |
| Afg3l1    | common | FALSE |
| Pole3     | common | TRUE  |

|           |        |       |
|-----------|--------|-------|
| Msl3      | common | FALSE |
| Creb1     | common | TRUE  |
| Mphosph6  | common | FALSE |
| 18100300C | common | FALSE |
| Kdm5c     | common | FALSE |
| Agpat5    | common | FALSE |
| Tpbp      | common | FALSE |
| Utp11l    | common | FALSE |
| Tlk2      | common | FALSE |
| 9430016HC | common | FALSE |
| Aasdhpt   | common | FALSE |
| Pgs1      | common | FALSE |
| Prkdc     | common | FALSE |
| Zbtb2     | common | TRUE  |
| Mrpl10    | common | FALSE |
| Prcp      | common | FALSE |
| Mgat2     | common | FALSE |
| Yes1      | common | FALSE |
| F2r       | common | FALSE |
| Dtx2      | common | FALSE |
| Rasa2     | common | FALSE |
| Ncaph2    | common | FALSE |
| Cul5      | common | FALSE |
| Camkk2    | common | FALSE |
| Ppp2r5e   | common | FALSE |
| Pik3r2    | common | FALSE |
| Tbc1d14   | common | FALSE |
| Cdk5rap2  | common | FALSE |
| Srsf11    | common | FALSE |
| Snx9      | common | FALSE |
| Ap3m1     | common | FALSE |
| Ireb2     | common | FALSE |
| Kctd5     | common | FALSE |
| Ddx6      | common | FALSE |
| Wipi2     | common | FALSE |
| Amer1     | common | FALSE |
| Exo5      | common | TRUE  |
| Rpl31     | common | FALSE |
| Crls1     | common | FALSE |
| Spr       | common | TRUE  |
| Hibadh    | common | FALSE |
| Sipa1     | common | FALSE |
| Gle1      | common | FALSE |
| Rpe       | common | FALSE |
| Akr7a5    | common | FALSE |
| Dock11    | common | FALSE |
| Zfp598    | common | TRUE  |
| Dab1      | common | FALSE |
| 2700049AC | common | FALSE |
| Prpf38b   | common | FALSE |

|          |        |       |
|----------|--------|-------|
| Gprc5b   | common | FALSE |
| Slc7a6os | common | FALSE |
| Gon4l    | common | FALSE |
| Fam219b  | common | FALSE |
| Mthfsd   | common | FALSE |
| Coq2     | common | FALSE |
| Ttc4     | common | FALSE |
| Pank4    | common | FALSE |
| Ipo13    | common | FALSE |
| Rpl7a    | common | FALSE |
| Dcps     | common | FALSE |
| Clip1    | common | FALSE |
| Ctage5   | common | FALSE |
| Mettl14  | common | TRUE  |
| Cln6     | common | FALSE |
| Mmd      | common | FALSE |
| Ankrd52  | common | FALSE |
| Sap130   | common | FALSE |
| Rbm26    | common | FALSE |
| Dzip3    | common | FALSE |
| Zfp184   | common | TRUE  |
| Stk11ip  | common | FALSE |
| Trp53bp1 | common | FALSE |
| Tceal8   | common | FALSE |
| Bag4     | common | FALSE |
| Rnps1    | common | FALSE |
| Poldip2  | common | FALSE |
| Rpl11    | common | FALSE |
| Poglut1  | common | FALSE |
| Rpl30.1  | common | FALSE |
| Dclre1a  | common | FALSE |
| Zeb2     | common | TRUE  |
| Dcakd    | common | FALSE |
| Oxa1l    | common | FALSE |
| Smox     | common | FALSE |
| B4galt2  | common | FALSE |
| Mettl9   | common | FALSE |
| Dmap1    | common | TRUE  |
| Rbm22    | common | TRUE  |
| Fam168b  | common | FALSE |
| Glis2    | common | TRUE  |
| Rbm45    | common | FALSE |
| Impa2    | common | FALSE |
| Tmem251  | common | FALSE |
| Slk      | common | FALSE |
| Mfge8    | common | FALSE |
| Timm44   | common | TRUE  |
| Ptdss2   | common | FALSE |
| Sap30    | common | TRUE  |
| Anapc4   | common | FALSE |

|            |        |       |
|------------|--------|-------|
| Aebp2      | common | TRUE  |
| Fam86      | common | FALSE |
| Zfyve19    | common | FALSE |
| Sep-08     | common | FALSE |
| Hlcs       | common | TRUE  |
| Gtf2h1     | common | FALSE |
| Guf1       | common | FALSE |
| Ascc2      | common | FALSE |
| Cmc2       | common | FALSE |
| Zfp553     | common | TRUE  |
| Dcun1d1    | common | FALSE |
| Gm8615     | common | FALSE |
| Cdkn2aip   | common | FALSE |
| Sec24b     | common | FALSE |
| Asap1      | common | FALSE |
| Cep131     | common | FALSE |
| Slc35g1    | common | FALSE |
| Gtpbp3     | common | FALSE |
| Hadh       | common | FALSE |
| Ppm1d      | common | FALSE |
| Sart1      | common | FALSE |
| Zfp191     | common | FALSE |
| Gnai1      | common | FALSE |
| Hrsp12     | common | FALSE |
| Minpp1     | common | FALSE |
| BC017158   | common | FALSE |
| Armc1      | common | FALSE |
| Ttf1       | common | FALSE |
| Ap2a1      | common | FALSE |
| Iffo2      | common | FALSE |
| Nudt8      | common | FALSE |
| Pikfyve    | common | FALSE |
| Gpalpp1    | common | FALSE |
| Kansl3     | common | FALSE |
| Dtd2       | common | FALSE |
| Ncbp2      | common | TRUE  |
| Gpkow      | common | FALSE |
| Ehd4       | common | FALSE |
| Cdk9       | common | FALSE |
| Pskh1      | common | FALSE |
| Ubap1      | common | FALSE |
| Mpi        | common | FALSE |
| Yaf2       | common | FALSE |
| Tmem18     | common | FALSE |
| Zik1       | common | TRUE  |
| Frrs1      | common | FALSE |
| Peli1      | common | FALSE |
| Fmnl3      | common | FALSE |
| D8Erttd82e | common | FALSE |
| 4930453N2  | common | FALSE |



|           |        |       |
|-----------|--------|-------|
| Hoxb4     | common | TRUE  |
| Tomm20    | common | FALSE |
| Glod4     | common | FALSE |
| Mdfi      | common | FALSE |
| Gins4     | common | FALSE |
| 2210018M  | common | FALSE |
| Rarb      | common | TRUE  |
| Vps54     | common | FALSE |
| Sphk2     | common | FALSE |
| Mrpl49    | common | FALSE |
| Mlst8     | common | FALSE |
| Bloc1s5   | common | FALSE |
| Gorasp1   | common | FALSE |
| Nme2      | common | FALSE |
| Snx1      | common | FALSE |
| Plekhg2   | common | FALSE |
| Mrpl39    | common | FALSE |
| Cwc27     | common | FALSE |
| Birc6     | common | FALSE |
| Zfp746    | common | TRUE  |
| Agpat6    | common | FALSE |
| Gmeb1     | common | TRUE  |
| Pi4k2a    | common | FALSE |
| Snora68   | common | FALSE |
| Cog4      | common | FALSE |
| C330007PC | common | FALSE |
| 1500012F0 | common | FALSE |
| E2f1      | common | TRUE  |
| Hjurp     | common | FALSE |
| Myg1      | common | FALSE |
| Crot      | common | FALSE |
| Helz      | common | FALSE |
| 2810468NC | common | FALSE |
| Zbtb17    | common | TRUE  |
| Nemf      | common | FALSE |
| Kansl2    | common | FALSE |
| Smarcal1  | common | FALSE |
| Adam17    | common | FALSE |
| Rab8b     | common | FALSE |
| Med23     | common | FALSE |
| Ccdc132   | common | FALSE |
| Mrpl2     | common | TRUE  |
| Ormdl2    | common | FALSE |
| Taf8      | common | FALSE |
| Hsp90b1   | common | FALSE |
| Rpp25l    | common | FALSE |
| Prrc1     | common | FALSE |
| Prpf19    | common | FALSE |
| Nckap1    | common | FALSE |
| 4930452G1 | common | FALSE |

|          |        |       |
|----------|--------|-------|
| Slc25a3  | common | FALSE |
| Clcc1    | common | FALSE |
| Zc3h14   | common | FALSE |
| Impa1    | common | FALSE |
| Tdrd3    | common | FALSE |
| Mtor     | common | FALSE |
| Commd8   | common | FALSE |
| Nprl3    | common | FALSE |
| Cept1    | common | FALSE |
| Twf2     | common | FALSE |
| Lzts2    | common | FALSE |
| Rnf220   | common | FALSE |
| Mrpl35   | common | FALSE |
| Hiatl1   | common | FALSE |
| Tmem2    | common | FALSE |
| Mtpap    | common | FALSE |
| Bcor     | common | FALSE |
| Hddc2    | common | FALSE |
| Dnajc1   | common | FALSE |
| Asph     | common | FALSE |
| Rad21    | common | TRUE  |
| Timm21   | common | FALSE |
| Ankhd1   | common | FALSE |
| Lrrc41   | common | FALSE |
| Gps1     | common | FALSE |
| Itsn1    | common | FALSE |
| Pgm3     | common | FALSE |
| Asap2    | common | FALSE |
| Zfml     | common | FALSE |
| Zfyve16  | common | FALSE |
| Cyba     | common | FALSE |
| Ppp1cc   | common | FALSE |
| Gpc1     | common | FALSE |
| Mtx1     | common | FALSE |
| Msantd2  | common | FALSE |
| Crocc    | common | FALSE |
| Ssbp1    | common | FALSE |
| BC030336 | common | FALSE |
| Mtx2     | common | FALSE |
| Mical3   | common | FALSE |
| Ccdc102a | common | FALSE |
| Rbm7     | common | TRUE  |
| Spg11    | common | FALSE |
| Kat6a    | common | FALSE |
| Dyrk1a   | common | FALSE |
| Wwp2     | common | FALSE |
| Cisd2    | common | FALSE |
| Tln1     | common | FALSE |
| Atad2b   | common | FALSE |
| Pag1     | common | FALSE |

|           |        |       |
|-----------|--------|-------|
| Fam171a1  | common | FALSE |
| Preb      | common | FALSE |
| Sox5      | common | TRUE  |
| Gna13     | common | FALSE |
| Rbm34     | common | FALSE |
| Tbc1d15   | common | FALSE |
| Ipo8      | common | FALSE |
| B630005N1 | common | FALSE |
| Mat2b     | common | FALSE |
| Atpaf1    | common | FALSE |
| Pik3r4    | common | FALSE |
| Smurf2    | common | FALSE |
| Tmem201   | common | FALSE |
| Trps1     | common | TRUE  |
| Zbtb26    | common | TRUE  |
| Rrp36     | common | FALSE |
| Lmtk2     | common | FALSE |
| Atp5a1    | common | FALSE |
| Tfg       | common | FALSE |
| Mcf2      | common | FALSE |
| Cox11     | common | FALSE |
| Tsen34    | common | FALSE |
| Pnrc2     | common | FALSE |
| Ccnd3     | common | FALSE |
| Myc       | common | TRUE  |
| Mrpl37    | common | FALSE |
| Wdr45b    | common | FALSE |
| Sh3bp1    | common | FALSE |
| Acn9      | common | FALSE |
| Gpc6      | common | FALSE |
| Cdc123    | common | FALSE |
| Snupn     | common | FALSE |
| Rnf20     | common | FALSE |
| Haus8     | common | FALSE |
| Zfp219    | common | TRUE  |
| Hmgb1     | common | TRUE  |
| Adck5     | common | FALSE |
| Ret       | common | FALSE |
| Fbxo21    | common | FALSE |
| Clpx      | common | FALSE |
| 0610030E2 | common | FALSE |
| Miip      | common | FALSE |
| Ube2l3    | common | FALSE |
| Fra10ac1  | common | FALSE |
| Zfp318    | common | FALSE |
| Ccar2     | common | FALSE |
| Itprp     | common | FALSE |
| AU019823  | common | FALSE |
| Chtop     | common | FALSE |
| Arfgap2   | common | FALSE |

|           |        |       |
|-----------|--------|-------|
| Hdac6     | common | TRUE  |
| Oxsr1     | common | FALSE |
| Tubgcp6   | common | FALSE |
| Emc1      | common | FALSE |
| D11Wsu47  | common | FALSE |
| Taf11     | common | FALSE |
| Mterfd2   | common | FALSE |
| Ep400     | common | FALSE |
| Scube3    | common | FALSE |
| Asb3      | common | FALSE |
| Tor1aip1  | common | FALSE |
| Ccdc127   | common | FALSE |
| Macf1     | common | FALSE |
| Slc35b4   | common | FALSE |
| Gmpr2     | common | FALSE |
| Mrpl9     | common | FALSE |
| Mri1      | common | FALSE |
| Psma6     | common | TRUE  |
| Litaf     | common | FALSE |
| Zdhhc18   | common | FALSE |
| Snrpe     | common | FALSE |
| Csl       | common | FALSE |
| Sipa1l1   | common | FALSE |
| Dhx30     | common | FALSE |
| Hs1bp3    | common | FALSE |
| Mapkap1   | common | FALSE |
| Zfand5    | common | FALSE |
| Lsm6      | common | TRUE  |
| Six5      | common | TRUE  |
| Rnf114    | common | TRUE  |
| Nek9      | common | FALSE |
| Pex2      | common | FALSE |
| Ttpal     | common | FALSE |
| Golph3    | common | FALSE |
| Tmem131   | common | FALSE |
| Pml       | common | TRUE  |
| Snx27     | common | FALSE |
| Zfp609    | common | FALSE |
| Map2k4    | common | FALSE |
| Zfp488    | common | FALSE |
| C430049BC | common | FALSE |
| Ganab     | common | FALSE |
| Copz1     | common | FALSE |
| Zbed6     | common | TRUE  |
| Brcc3     | common | FALSE |
| Twf1      | common | FALSE |
| Usp45     | common | FALSE |
| Fam118b   | common | FALSE |
| Palld     | common | FALSE |
| Tle3      | common | FALSE |

|           |        |       |
|-----------|--------|-------|
| Mar-05    | common | FALSE |
| Dxo       | common | FALSE |
| Smad5     | common | TRUE  |
| Purb      | common | FALSE |
| Map2k1    | common | FALSE |
| Rcn2      | common | FALSE |
| Samm50    | common | FALSE |
| Dnajc19   | common | FALSE |
| Phkb      | common | FALSE |
| Pofut1    | common | FALSE |
| Dpy30     | common | FALSE |
| Fbxo34    | common | FALSE |
| Eps15l1   | common | FALSE |
| Xylt2     | common | FALSE |
| R3hcc1l   | common | FALSE |
| 1700020l1 | common | FALSE |
| Atrip     | common | FALSE |
| Tceb3     | common | FALSE |
| Rpl29     | common | FALSE |
| Fam49a    | common | FALSE |
| Mccc1     | common | FALSE |
| Tsc22d2   | common | FALSE |
| Ap3b1     | common | FALSE |
| Cdk17     | common | FALSE |
| Kdelc2    | common | FALSE |
| Mb21d2    | common | FALSE |
| Sesn2     | common | FALSE |
| Zkscan8   | common | TRUE  |
| Pter      | common | FALSE |
| Wibg      | common | FALSE |
| Mmab      | common | FALSE |
| Dap3      | common | FALSE |
| Pgap2     | common | FALSE |
| Ints4     | common | FALSE |
| Scrib     | common | FALSE |
| Mtrf1l    | common | FALSE |
| 2700029M  | common | FALSE |
| Mrpl11    | common | FALSE |
| Pex6      | common | FALSE |
| Flnb      | common | FALSE |
| Vps4b     | common | TRUE  |
| Wdr33     | common | FALSE |
| Gpatch2   | common | FALSE |
| Glrx5     | common | FALSE |
| Tcea1     | common | FALSE |
| BC023829  | common | FALSE |
| Csnk1g2   | common | FALSE |
| Mrpl18    | common | FALSE |
| Cap1      | common | FALSE |
| Gnai3     | common | FALSE |

|          |        |       |
|----------|--------|-------|
| Bola3    | common | FALSE |
| Phactr4  | common | FALSE |
| Fkbp10   | common | FALSE |
| Pcdhgc3  | common | FALSE |
| Sfxn5    | common | FALSE |
| Hnrnp1   | common | FALSE |
| Pros1    | common | FALSE |
| Tubgcp5  | common | FALSE |
| Thumpd2  | common | FALSE |
| Slc25a36 | common | FALSE |
| Invs     | common | FALSE |
| Phf23    | common | FALSE |
| Lats2    | common | FALSE |
| H2afy3   | common | FALSE |
| Aarsd1   | common | FALSE |
| Mllt10   | common | FALSE |
| Zfp871   | common | FALSE |
| Xpnpep1  | common | FALSE |
| Ndn12    | common | FALSE |
| Rnf169   | common | FALSE |
| Mier2    | common | FALSE |
| Kat8     | common | FALSE |
| Slc25a10 | common | FALSE |
| Nnt      | common | TRUE  |
| Gm17066  | common | FALSE |
| Erlin2   | common | FALSE |
| Sec14l1  | common | FALSE |
| Ccdc22   | common | FALSE |
| Pttg1    | common | FALSE |
| Snn      | common | FALSE |
| Mcts2    | common | FALSE |
| Plekho2  | common | FALSE |
| AU022252 | common | FALSE |
| Copb2    | common | FALSE |
| Pibf1    | common | FALSE |
| Eif4e2   | common | FALSE |
| Syng2    | common | FALSE |
| Prdm2    | common | FALSE |
| Dis3l    | common | FALSE |
| Zscan21  | common | TRUE  |
| Pak2     | common | FALSE |
| C2cd3    | common | FALSE |
| Kdm3a    | common | FALSE |
| Slmo2    | common | FALSE |
| Plekhg3  | common | FALSE |
| Rapgef1  | common | FALSE |
| Pex13    | common | FALSE |
| Slc38a1  | common | FALSE |
| Cdc26    | common | FALSE |
| Mbtd1    | common | FALSE |

|           |        |       |
|-----------|--------|-------|
| Tsta3     | common | FALSE |
| Exoc3     | common | FALSE |
| Ankrd11   | common | FALSE |
| Pcbp2     | common | FALSE |
| Limd1     | common | FALSE |
| Rpl6      | common | TRUE  |
| Supt20    | common | TRUE  |
| Snx24     | common | FALSE |
| Kbtbd2    | common | FALSE |
| Rps6kb1   | common | FALSE |
| Tcf19     | common | FALSE |
| Alg10b    | common | FALSE |
| Rwdd1     | common | FALSE |
| Nlk       | common | FALSE |
| Zfp36l1   | common | FALSE |
| Rnaseh2b  | common | FALSE |
| Nfe2l1    | common | TRUE  |
| Zfp69     | common | TRUE  |
| Atf6b     | common | TRUE  |
| Gm1943    | common | FALSE |
| Mrpl36    | common | FALSE |
| Rab28     | common | FALSE |
| Trnau1ap  | common | FALSE |
| Rpgrip1l  | common | FALSE |
| 0610040J0 | common | FALSE |
| Dgkz      | common | FALSE |
| Ap1b1     | common | FALSE |
| Zfp281    | common | TRUE  |
| Med7      | common | FALSE |
| Kctd3     | common | FALSE |
| Pced1a    | common | FALSE |
| Ogfr      | common | FALSE |
| Mepce     | common | FALSE |
| Pcnp      | common | FALSE |
| Cdk5rap3  | common | FALSE |
| Cpne2     | common | FALSE |
| Krit1     | common | FALSE |
| Lphn2     | common | FALSE |
| Srp72     | common | FALSE |
| Wdr82     | common | FALSE |
| Fam173b   | common | FALSE |
| Fam53c    | common | FALSE |
| Zfp687    | common | TRUE  |
| Lpgat1    | common | FALSE |
| Garem     | common | FALSE |
| Plod2     | common | FALSE |
| Ehd1      | common | FALSE |
| Smyd2     | common | FALSE |
| Mbtps1    | common | FALSE |
| Ski       | common | FALSE |

|          |        |       |
|----------|--------|-------|
| Pomt1    | common | FALSE |
| Ube3b    | common | FALSE |
| Tmed1    | common | FALSE |
| Fzd3     | common | FALSE |
| Mad2l1bp | common | FALSE |
| Frmd4a   | common | FALSE |
| Rprd2    | common | FALSE |
| Traf3    | common | FALSE |
| Ppil4    | common | FALSE |
| Fbxo28   | common | FALSE |
| Psmc3    | common | FALSE |
| Zscan29  | common | TRUE  |
| Kbtbd4   | common | FALSE |
| Gng5     | common | FALSE |
| Arap1    | common | FALSE |
| Zfp330   | common | FALSE |
| Sh3tc2   | common | FALSE |
| Inpp1    | common | FALSE |
| Banp     | common | TRUE  |
| Atg4c    | common | FALSE |
| Psph     | common | FALSE |
| Hoxd9    | common | TRUE  |
| Rfxap    | common | TRUE  |
| Auts2    | common | FALSE |
| Sec61a1  | common | FALSE |
| Tor1b    | common | FALSE |
| Rell1    | common | FALSE |
| Lbh      | common | FALSE |
| P4hb     | common | TRUE  |
| Nme1     | common | TRUE  |
| Zfp384   | common | FALSE |
| Hnrnpa0  | common | TRUE  |
| Dhrs4    | common | FALSE |
| Tspan6   | common | FALSE |
| AW549877 | common | FALSE |
| Prr14l   | common | FALSE |
| Homer2   | common | FALSE |
| Cdr2l    | common | FALSE |
| Dgkd     | common | FALSE |
| Oser1    | common | FALSE |
| Gnpda1   | common | FALSE |
| Spata2   | common | FALSE |
| Ethe1    | common | FALSE |
| Cdc42se1 | common | FALSE |
| Ylpm1    | common | FALSE |
| Npl      | common | FALSE |
| M6pr     | common | FALSE |
| Ptpn13   | common | FALSE |
| Zfp111   | common | TRUE  |
| Angel2   | common | FALSE |



|          |        |       |
|----------|--------|-------|
| Specc1l  | common | FALSE |
| Zfp692   | common | TRUE  |
| Smc1a    | common | FALSE |
| Pogz     | common | FALSE |
| Trim33   | common | TRUE  |
| Ncoa3    | common | FALSE |
| Prdx3    | common | FALSE |
| Mrpl22   | common | FALSE |
| Slc30a6  | common | FALSE |
| Vars2    | common | FALSE |
| Ndufs2   | common | FALSE |
| Snrpa    | common | FALSE |
| Crtc2    | common | TRUE  |
| Nelfb    | common | TRUE  |
| Pdcl     | common | FALSE |
| Lhfpl2   | common | FALSE |
| Meaf6    | common | FALSE |
| Lpp      | common | FALSE |
| Hectd1   | common | FALSE |
| Ankrd28  | common | FALSE |
| Vps26a   | common | FALSE |
| Bambi    | common | FALSE |
| Sugt1    | common | FALSE |
| Mar-07   | common | FALSE |
| Naa60    | common | FALSE |
| Ube2q1   | common | FALSE |
| Rbm33    | common | FALSE |
| Dmtf1    | common | FALSE |
| Tm9sf2   | common | FALSE |
| Sumo1    | common | FALSE |
| Ankrd10  | common | FALSE |
| Rpl8     | common | FALSE |
| Med19    | common | FALSE |
| Psma4    | common | FALSE |
| Setd1a   | common | FALSE |
| Dcun1d5  | common | FALSE |
| Zfp212   | common | TRUE  |
| Zfp639   | common | TRUE  |
| Ncoa5    | common | FALSE |
| Sh3gl1   | common | FALSE |
| Gskip    | common | FALSE |
| Igf2r    | common | FALSE |
| Slc35c2  | common | FALSE |
| Phf12    | common | FALSE |
| Ccdc61   | common | FALSE |
| Smad4    | common | TRUE  |
| Snrnp48  | common | FALSE |
| Taf10    | common | FALSE |
| Ptpn11   | common | FALSE |
| Hnrnpul2 | common | FALSE |

|          |        |       |
|----------|--------|-------|
| Top3b    | common | FALSE |
| Fgfr1op2 | common | FALSE |
| Fam175b  | common | FALSE |
| Cd2bp2   | common | FALSE |
| Rspry1   | common | FALSE |
| Gsr      | common | FALSE |
| Rhbdf1   | common | FALSE |
| Ubl3     | common | FALSE |
| Egln1    | common | FALSE |
| Vdac3    | common | FALSE |
| Btf3     | common | FALSE |
| Setd2    | common | FALSE |
| H19      | common | FALSE |
| Mbd1     | common | TRUE  |
| Brd3     | common | FALSE |
| Gm53     | common | FALSE |
| Rgl1     | common | FALSE |
| Samd4b   | common | FALSE |
| Dusp22   | common | TRUE  |
| Acp6     | common | FALSE |
| Mgst1    | common | FALSE |
| 5430416N | common | FALSE |
| Csrnp2   | common | FALSE |
| Usp34    | common | FALSE |
| Rps19bp1 | common | FALSE |
| Fntb     | common | FALSE |
| Gm5434   | common | FALSE |
| Lias     | common | FALSE |
| Rbbp6    | common | FALSE |
| Zfp354c  | common | TRUE  |
| Rnf185   | common | FALSE |
| Ogg1     | common | FALSE |
| Zmym4    | common | FALSE |
| Clpb     | common | FALSE |
| Tiam1    | common | FALSE |
| Mrpl13   | common | FALSE |
| Atxn1l   | common | FALSE |
| Serpinh1 | common | FALSE |
| Acap2    | common | FALSE |
| Zmym2    | common | FALSE |
| Zfp740   | common | TRUE  |
| Rps8     | common | FALSE |
| Midn     | common | FALSE |
| Brpf3    | common | FALSE |
| Dcaf12   | common | FALSE |
| Hax1     | common | FALSE |
| Abhd17a  | common | FALSE |
| Gldc     | common | FALSE |
| Dnm1l    | common | FALSE |
| Rttm     | common | FALSE |

|           |        |       |
|-----------|--------|-------|
| Cfdp1     | common | FALSE |
| Ahcyl1    | common | FALSE |
| Fbxw11    | common | FALSE |
| B4galt7   | common | FALSE |
| Sltm      | common | FALSE |
| Nr2c1     | common | TRUE  |
| Upf2      | common | FALSE |
| Chst11    | common | FALSE |
| Ggta1     | common | FALSE |
| Mterfd1   | common | FALSE |
| Ubac2     | common | FALSE |
| Sec24c    | common | FALSE |
| Mtmr12    | common | FALSE |
| Moxd1     | common | FALSE |
| Uros      | common | FALSE |
| Ttc21b    | common | FALSE |
| Rfwd2     | common | FALSE |
| Trim7     | common | FALSE |
| Nsd1      | common | FALSE |
| Clk2      | common | FALSE |
| Pex14     | common | FALSE |
| Mfsd5     | common | FALSE |
| Pnkp      | common | FALSE |
| Hoxa2     | common | TRUE  |
| Rbm12b2   | common | FALSE |
| 1110037F0 | common | FALSE |
| Tmem126a  | common | FALSE |
| Kdm5a     | common | TRUE  |
| Rmnd5a    | common | FALSE |
| Lage3     | common | FALSE |
| Pcgf2     | common | FALSE |
| Sf3b2     | common | FALSE |
| Rfk       | common | FALSE |
| Stk38     | common | FALSE |
| 4930594C1 | common | FALSE |
| Nsmce2    | common | FALSE |
| Ctnnd1    | common | FALSE |
| Arfrp1    | common | FALSE |
| Necap2    | common | FALSE |
| Chd8      | common | FALSE |
| Fbf1      | common | FALSE |
| Gtf2f1    | common | TRUE  |
| Coa4      | common | FALSE |
| Rac1      | common | FALSE |
| 2310003HC | common | FALSE |
| Id2       | common | TRUE  |
| Rrbp1     | common | FALSE |
| Scyl3     | common | FALSE |
| Mcl1      | common | FALSE |
| Fkbp9     | common | FALSE |

|           |        |       |
|-----------|--------|-------|
| Gigyf2    | common | FALSE |
| Coq6      | common | FALSE |
| Atxn2     | common | FALSE |
| Hoxa4     | common | TRUE  |
| Gm5512.1  | common | FALSE |
| Ssh1      | common | FALSE |
| Chst3     | common | FALSE |
| Xpc       | common | FALSE |
| Tmem231   | common | FALSE |
| Akt2      | common | FALSE |
| Slc35e2   | common | FALSE |
| Dlx2      | common | TRUE  |
| Mysm1     | common | FALSE |
| 2410002F2 | common | FALSE |
| Wdfy1     | common | FALSE |
| Phf20     | common | FALSE |
| Shprh     | common | FALSE |
| Echdc1    | common | FALSE |
| Cog8      | common | FALSE |
| Dnajb12   | common | FALSE |
| Wnk4      | common | FALSE |
| Rft1      | common | FALSE |
| Ewsr1     | common | TRUE  |
| Gid8      | common | FALSE |
| Smim13    | common | FALSE |
| Med20     | common | FALSE |
| Rplp1     | common | FALSE |
| Apopt1    | common | FALSE |
| Bcl9      | common | FALSE |
| Peak1     | common | FALSE |
| Insc      | common | FALSE |
| Sepp1     | common | FALSE |
| Mettl10   | common | FALSE |
| Srprb     | common | FALSE |
| Dcaf10    | common | FALSE |
| Ap3s2     | common | FALSE |
| Mtdh      | common | FALSE |
| Naa35     | common | FALSE |
| 061000902 | common | FALSE |
| Zfp36l2   | common | FALSE |
| Ephb2     | common | FALSE |
| Uba1      | common | FALSE |
| Eefsec    | common | FALSE |
| Igfbp1    | common | FALSE |
| Micu2     | common | FALSE |
| Brd1      | common | FALSE |
| Npepps    | common | FALSE |
| Dgcr14    | common | FALSE |
| Man1b1    | common | FALSE |
| Strn      | common | FALSE |

|            |        |       |
|------------|--------|-------|
| Cdk10      | common | FALSE |
| Otud7b     | common | FALSE |
| D3Erttd254 | common | TRUE  |
| Pts        | common | FALSE |
| Fggy       | common | FALSE |
| Rnf121     | common | FALSE |
| Chd4       | common | FALSE |
| BC003965   | common | FALSE |
| Tmed7      | common | FALSE |
| Rxrb       | common | TRUE  |
| Xndc1      | common | FALSE |
| Lepre1     | common | FALSE |
| Fbxl5      | common | FALSE |
| Lrrc42     | common | FALSE |
| Polg       | common | FALSE |
| Arfip1     | common | FALSE |
| Gusb       | common | FALSE |
| Efs        | common | FALSE |
| Ddx50      | common | FALSE |
| Depdc5     | common | FALSE |
| Med24      | common | FALSE |
| Tmem138    | common | FALSE |
| 2810055G2  | common | FALSE |
| Tssc4      | common | FALSE |
| Rasa1      | common | FALSE |
| Arnt       | common | TRUE  |
| Fzr1       | common | FALSE |
| Gtf2ird1   | common | TRUE  |
| Cnpy4      | common | FALSE |
| Mkl2       | common | FALSE |
| Tbc1d7     | common | FALSE |
| Setd5      | common | FALSE |
| H2afy      | common | TRUE  |
| 4933426M   | common | FALSE |
| Bag5       | common | FALSE |
| Glrx3      | common | FALSE |
| Dusp11     | common | FALSE |
| Sdhd       | common | FALSE |
| Cchcr1     | common | FALSE |
| Ndufab1    | common | FALSE |
| Mtmr10     | common | FALSE |
| 583041711  | common | FALSE |
| Gcdh       | common | FALSE |
| Scarb1     | common | FALSE |
| Slc39a9    | common | FALSE |
| Ttc13      | common | FALSE |
| Snrpf      | common | FALSE |
| Herpud2    | common | FALSE |
| Stim2      | common | FALSE |
| Cxxc5      | common | FALSE |

|           |        |       |
|-----------|--------|-------|
| Nckap5l   | common | FALSE |
| Trappc12  | common | FALSE |
| Xiap      | common | FALSE |
| Fbxo11    | common | FALSE |
| Raph1     | common | FALSE |
| Fbxl12    | common | FALSE |
| Magohb    | common | FALSE |
| Fam76b    | common | FALSE |
| Lrp5      | common | FALSE |
| Fam120a   | common | FALSE |
| Tmem29    | common | FALSE |
| Arhgef25  | common | FALSE |
| Trappc5   | common | FALSE |
| Tmem106c  | common | FALSE |
| 0610010K1 | common | FALSE |
| Vps16     | common | FALSE |
| Snpc2     | common | FALSE |
| Rad52     | common | FALSE |
| Irak1     | common | FALSE |
| Arap3     | common | FALSE |
| Zfp362    | common | TRUE  |
| Men1      | common | FALSE |
| Gm6548    | common | FALSE |
| Rnf139    | common | FALSE |
| Zfp617    | common | FALSE |
| Zfp768    | common | TRUE  |
| Ncoa6     | common | FALSE |
| Dak       | common | FALSE |
| 2210016F1 | common | FALSE |
| Galc      | common | FALSE |
| Loxl3     | common | FALSE |
| Arih1     | common | FALSE |
| N6amt2    | common | FALSE |
| Apip      | common | FALSE |
| Gtf3c1    | common | FALSE |
| Ryk       | common | FALSE |
| Vcl       | common | FALSE |
| Rpl18     | common | FALSE |
| Rassf1    | common | FALSE |
| Magt1     | common | FALSE |
| R3hdm1    | common | FALSE |
| Rpl17     | common | FALSE |
| Phc2      | common | FALSE |
| Supt6     | common | FALSE |
| Tox4      | common | FALSE |
| Zcchc11   | common | FALSE |
| Eny2      | common | FALSE |
| Wtap      | common | FALSE |
| Rnf111    | common | FALSE |
| Zfp410    | common | TRUE  |

|           |        |       |
|-----------|--------|-------|
| Nrd1      | common | FALSE |
| Dcaf8     | common | FALSE |
| Slc7a6    | common | FALSE |
| Plin3     | common | FALSE |
| Copg2     | common | FALSE |
| Lta4h     | common | FALSE |
| Mrgbp     | common | FALSE |
| Zdhhc20   | common | FALSE |
| Ankrd17   | common | FALSE |
| Cdk11b    | common | FALSE |
| Rps4x     | common | TRUE  |
| Arid1a    | common | FALSE |
| Eif4ebp3  | common | FALSE |
| Mrpl17    | common | FALSE |
| Mms19     | common | FALSE |
| Map2k5    | common | FALSE |
| Trmt1l    | common | FALSE |
| Hnrnpa3   | common | FALSE |
| Lmf1      | common | FALSE |
| Sec16a    | common | FALSE |
| Apba3     | common | FALSE |
| Extl2     | common | FALSE |
| Zfp780b   | common | TRUE  |
| Cab39     | common | FALSE |
| Sorbs3    | common | FALSE |
| Paip2b    | common | FALSE |
| Zbed3     | common | FALSE |
| Rpl14-ps1 | common | FALSE |
| Fam92a    | common | FALSE |
| Kansl1    | common | FALSE |
| Cyp20a1   | common | FALSE |
| Ccdc9     | common | FALSE |
| Rtca      | common | FALSE |
| Pip5k1a   | common | FALSE |
| Babam1    | common | FALSE |
| Rnf216    | common | FALSE |
| Mark3     | common | FALSE |
| Hmox2     | common | FALSE |
| Dlg3      | common | FALSE |
| Cul7      | common | FALSE |
| Trip12    | common | FALSE |
| Zfp91     | common | TRUE  |
| Rab3ip    | common | FALSE |
| Trove2    | common | TRUE  |
| Supt7l    | common | FALSE |
| 2310067B1 | common | FALSE |
| Pmpcb     | common | FALSE |
| Zfp426    | common | TRUE  |
| Ube2d2a   | common | FALSE |
| Armc5     | common | FALSE |

|           |        |       |
|-----------|--------|-------|
| Plekhh1   | common | FALSE |
| Phtf1     | common | TRUE  |
| A830082K1 | common | FALSE |
| Kdm3b     | common | FALSE |
| Ammecr1l  | common | FALSE |
| Dido1     | common | FALSE |
| Phf14     | common | FALSE |
| Krcc1     | common | FALSE |
| Fam73b    | common | FALSE |
| Tmem263   | common | FALSE |
| Pdia6     | common | FALSE |
| Capza2    | common | FALSE |
| Ciz1      | common | FALSE |
| Dot1l     | common | FALSE |
| Tmem68    | common | FALSE |
| Pias2     | common | FALSE |
| Scyl1     | common | FALSE |
| Socs5     | common | FALSE |
| 1700123O2 | common | FALSE |
| Fbln2     | common | FALSE |
| Ccnc      | common | FALSE |
| Rpl14     | common | FALSE |
| Tfdp2     | common | TRUE  |
| Scfd1     | common | FALSE |
| Brwd1     | common | FALSE |
| Fam109a   | common | FALSE |
| Ambra1    | common | FALSE |
| Rad51b    | common | FALSE |
| Cpd       | common | FALSE |
| Mmadhc    | common | FALSE |
| Slc45a4   | common | FALSE |
| Cnp       | common | FALSE |
| Caskin2   | common | FALSE |
| Vopp1     | common | FALSE |
| Slc30a7   | common | FALSE |
| Zfp618    | common | FALSE |
| Rhod      | common | FALSE |
| Ubr1      | common | FALSE |
| Sdc3      | common | FALSE |
| Ccdc50    | common | FALSE |
| Supt5     | common | FALSE |
| Ubr2      | common | FALSE |
| Phxr4     | common | FALSE |
| Zfp608    | common | FALSE |
| Nit1      | common | FALSE |
| Jag1      | common | FALSE |
| Abi1      | common | FALSE |
| Tmem260   | common | FALSE |
| Med12     | common | FALSE |
| Cc2d1b    | common | FALSE |



|           |        |       |
|-----------|--------|-------|
| Chuk      | common | FALSE |
| Pign      | common | FALSE |
| Haus7     | common | FALSE |
| Suco      | common | FALSE |
| Hmces     | common | FALSE |
| Pkd2      | common | FALSE |
| Pofut2    | common | FALSE |
| Tnfaip1   | common | FALSE |
| Phip      | common | FALSE |
| Fam58b    | common | FALSE |
| Malsu1    | common | FALSE |
| Sbno1     | common | FALSE |
| Luc7l     | common | FALSE |
| Vrk3      | common | FALSE |
| Tial1     | common | FALSE |
| Mkks      | common | FALSE |
| Ppip5k2   | common | FALSE |
| Ppp2r3c   | common | FALSE |
| Cdon      | common | FALSE |
| Ppifos    | common | FALSE |
| Pigh      | common | FALSE |
| Hist1h4i  | common | FALSE |
| Gatad2b   | common | FALSE |
| Rps3      | common | FALSE |
| Nudt14    | common | FALSE |
| Tpst2     | common | FALSE |
| Ube2j2    | common | FALSE |
| Sh3bgrl   | common | FALSE |
| Smarce1   | common | FALSE |
| Mboat7    | common | FALSE |
| Zfp397    | common | TRUE  |
| Exosc4    | common | FALSE |
| Ighmbp2   | common | FALSE |
| Uggt2     | common | FALSE |
| 1700021F0 | common | FALSE |
| Terf2     | common | TRUE  |
| Stxbp2    | common | FALSE |
| Etl4      | common | FALSE |
| Ppp1ca    | common | FALSE |
| Mfsd10    | common | FALSE |
| 1810013L2 | common | FALSE |
| Ppcs      | common | FALSE |
| Pcnx13    | common | FALSE |
| Mapkapk5  | common | FALSE |
| Aaed1     | common | FALSE |
| Lsm14b    | common | FALSE |
| Chid1     | common | FALSE |
| Mrpl42    | common | FALSE |
| Wbp1l     | common | FALSE |
| Cpsf7     | common | FALSE |

|            |        |       |
|------------|--------|-------|
| Htatsf1    | common | FALSE |
| Pyurf      | common | FALSE |
| Cdk13      | common | FALSE |
| Rpl22l1    | common | FALSE |
| Cmtm5      | common | FALSE |
| Trim24     | common | TRUE  |
| Prorsd1    | common | FALSE |
| Natd1      | common | FALSE |
| Camk2b     | common | FALSE |
| Smarca4    | common | TRUE  |
| Acy3       | common | FALSE |
| Klhl26     | common | FALSE |
| Tmem185t   | common | FALSE |
| 2610020H   | common | FALSE |
| Fto        | common | FALSE |
| Fam73a     | common | FALSE |
| Map4k4     | common | FALSE |
| Srek1      | common | FALSE |
| Plod1      | common | FALSE |
| Zfp157     | common | FALSE |
| Map3k1     | common | FALSE |
| Zc3h13     | common | FALSE |
| Pdia4      | common | FALSE |
| Arpc1b     | common | FALSE |
| Pisd       | common | FALSE |
| Cramp1l    | common | FALSE |
| Smtn       | common | FALSE |
| 0610007P1  | common | FALSE |
| St6galnac3 | common | FALSE |
| Snx19      | common | FALSE |
| Tmem161a   | common | FALSE |
| Atmin      | common | FALSE |
| Ppp1r18    | common | FALSE |
| Ywhae      | common | TRUE  |
| Slc26a2    | common | FALSE |
| Lnx2       | common | FALSE |
| 1810026J2  | common | FALSE |
| Akirin2    | common | FALSE |
| Armc10     | common | FALSE |
| Zbtb34     | common | TRUE  |
| Cnnm3      | common | FALSE |
| Coasy      | common | FALSE |
| Lrfn4      | common | FALSE |
| Ccdc71     | common | FALSE |
| Shoc2      | common | FALSE |
| Aamp       | common | FALSE |
| Myl12a     | common | FALSE |
| Hmgcl      | common | FALSE |
| Ccdc66     | common | FALSE |
| Rock2      | common | FALSE |

|           |        |       |
|-----------|--------|-------|
| Snx4      | common | FALSE |
| Abcb8     | common | FALSE |
| Slc37a3   | common | FALSE |
| Zfp445    | common | TRUE  |
| Bach1     | common | TRUE  |
| Zfp326    | common | TRUE  |
| Fcf1      | common | FALSE |
| Fytd1     | common | FALSE |
| Zbtb18    | common | TRUE  |
| 2500004CC | common | FALSE |
| Ndufv1    | common | FALSE |
| Uck1      | common | FALSE |
| Mrpl28    | common | FALSE |
| Cxxc1     | common | TRUE  |
| Btbd3     | common | FALSE |
| Pygo2     | common | FALSE |
| Stk11     | common | FALSE |
| Rexo1     | common | FALSE |
| Ift140    | common | FALSE |
| Rpl23     | common | FALSE |
| Med29     | common | FALSE |
| Itfg3     | common | FALSE |
| Znrd1     | common | FALSE |
| Zgpat     | common | FALSE |
| Tm9sf4    | common | FALSE |
| Nans      | common | FALSE |
| Cep164    | common | FALSE |
| Bub3      | common | FALSE |
| Tab1      | common | FALSE |
| Ccnyl1    | common | FALSE |
| Trip4     | common | FALSE |
| Ttc1      | common | FALSE |
| Entpd7    | common | FALSE |
| Zfp771    | common | TRUE  |
| Pomk      | common | FALSE |
| Sumf2     | common | FALSE |
| Senp6     | common | FALSE |
| Spata6    | common | FALSE |
| Mgat1     | common | FALSE |
| G6pd2     | common | FALSE |
| Bphl      | common | FALSE |
| Dennd6a   | common | FALSE |
| D17H6S53f | common | FALSE |
| Tmem168   | common | FALSE |
| Src       | common | FALSE |
| Kbtbd11   | common | FALSE |
| Kazn      | common | FALSE |
| Lima1     | common | FALSE |
| Fndc3a    | common | FALSE |
| Pkig      | common | FALSE |

|           |        |       |
|-----------|--------|-------|
| Myo1b     | common | FALSE |
| Ccdc55    | common | FALSE |
| Tor1aip2  | common | FALSE |
| Epb4.1l2  | common | FALSE |
| Mtif2     | common | FALSE |
| Cdk2ap1   | common | TRUE  |
| Ube2z     | common | FALSE |
| Sdsl      | common | FALSE |
| 4933411K2 | common | FALSE |
| Tbc1d2b   | common | FALSE |
| Efcab14   | common | FALSE |
| Synm      | common | FALSE |
| Hivep1    | common | TRUE  |
| 2610301B2 | common | FALSE |
| Rbpj      | common | TRUE  |
| Rgp1      | common | FALSE |
| Vps72     | common | TRUE  |
| Mtch2     | common | FALSE |
| Rpl10a    | common | FALSE |
| Tmem184t  | common | FALSE |
| Inpp5b    | common | FALSE |
| Gclm      | common | FALSE |
| Cbfb      | common | TRUE  |
| Fbxo46    | common | FALSE |
| Prr3      | common | FALSE |
| Vmp1      | common | FALSE |
| Ngdn      | common | FALSE |
| Nipbl     | common | FALSE |
| Psmf1     | common | FALSE |
| Map3k3    | common | FALSE |
| Col18a1   | common | FALSE |
| Top2b     | common | FALSE |
| Fuk       | common | FALSE |
| Rhoq      | common | FALSE |
| Zfat      | common | FALSE |
| Cog6      | common | FALSE |
| 2410006H1 | common | FALSE |
| Epm2aip1  | common | FALSE |
| Zcchc9    | common | FALSE |
| Klhl5     | common | FALSE |
| Sptlc1    | common | FALSE |
| Snrpg     | common | FALSE |
| Trpv4     | common | FALSE |
| B4galt6   | common | FALSE |
| C030046E1 | common | FALSE |
| Nfat5     | common | TRUE  |
| Tab2      | common | FALSE |
| Dmxl1     | common | FALSE |
| Fam3c     | common | FALSE |
| Pdcd2l    | common | FALSE |

|          |        |       |
|----------|--------|-------|
| Wrn      | common | FALSE |
| Fam133b  | common | FALSE |
| Srek1ip1 | common | FALSE |
| N4bp2l2  | common | FALSE |
| Filip1l  | common | FALSE |
| Arf3     | common | FALSE |
| Mynn     | common | TRUE  |
| Zfp160   | common | TRUE  |
| Tbc1d16  | common | FALSE |
| Ndor1    | common | FALSE |
| Gorasp2  | common | FALSE |
| Wasl     | common | FALSE |
| Rps25    | common | FALSE |
| Cd302    | common | FALSE |
| Akap13   | common | FALSE |
| Pex19    | common | FALSE |
| Tab3     | common | FALSE |
| Git1     | common | FALSE |
| Cdc5l    | common | TRUE  |
| Scamp4   | common | FALSE |
| Prkd1    | common | FALSE |
| Ube2m    | common | FALSE |
| Rtkn     | common | FALSE |
| Man2c1   | common | FALSE |
| Ift52    | common | FALSE |
| Kremen1  | common | FALSE |
| Tmem33   | common | TRUE  |
| Ppp1r16b | common | FALSE |
| Slc26a11 | common | FALSE |
| Trim26   | common | FALSE |
| Med15    | common | FALSE |
| Nfkb1    | common | TRUE  |
| Mir7090  | common | FALSE |
| Tstd3    | common | FALSE |
| Gna12    | common | FALSE |
| Camkv    | common | FALSE |
| Apool    | common | FALSE |
| Rpl36a   | common | FALSE |
| Snx2     | common | FALSE |
| Nlgn3    | common | FALSE |
| Nudt9    | common | FALSE |
| Ctsk     | common | FALSE |
| Mast2    | common | FALSE |
| Mcu      | common | FALSE |
| Mrpl4    | common | FALSE |
| Ilkap    | common | FALSE |
| Cnot6    | common | TRUE  |
| Tpm3     | common | FALSE |
| Lacc1    | common | FALSE |
| Tmem101  | common | FALSE |

|           |        |       |
|-----------|--------|-------|
| Jam3      | common | FALSE |
| Snx10     | common | FALSE |
| Snx6      | common | FALSE |
| Safb2     | common | FALSE |
| Hilpda    | common | FALSE |
| Paxbp1    | common | FALSE |
| Pigu      | common | FALSE |
| Rarg      | common | TRUE  |
| Wiz       | common | FALSE |
| Srrd      | common | FALSE |
| Golim4    | common | FALSE |
| Gyg       | common | FALSE |
| Asb7      | common | FALSE |
| Sgsh      | common | FALSE |
| Ccdc59    | common | FALSE |
| Zfp606    | common | TRUE  |
| Ikbkg     | common | FALSE |
| Naa20     | common | FALSE |
| Gatad1    | common | FALSE |
| AI846148  | common | FALSE |
| Impad1    | common | FALSE |
| Ccni      | common | FALSE |
| Dolk      | common | FALSE |
| Peg3      | common | TRUE  |
| Srp19     | common | FALSE |
| Hoxd8     | common | TRUE  |
| Fam179b   | common | FALSE |
| Chchd5    | common | FALSE |
| Ppic      | common | FALSE |
| Acads     | common | FALSE |
| 4931406CC | common | FALSE |
| Mtcp1     | common | FALSE |
| Ing1      | common | FALSE |
| Zfp62     | common | TRUE  |
| Fundc1    | common | FALSE |
| Ptpn12    | common | FALSE |
| Gypc      | common | FALSE |
| Anapc10   | common | FALSE |
| Efr3a     | common | FALSE |
| Gm10069   | common | FALSE |
| Pan2      | common | FALSE |
| Frs2      | common | FALSE |
| Ptx3      | common | FALSE |
| Calu      | common | FALSE |
| Tiprl     | common | FALSE |
| Bet1      | common | FALSE |
| Cant1     | common | FALSE |
| Pla2g6    | common | FALSE |
| Gpatch8   | common | FALSE |
| Zfhx4     | common | FALSE |

|           |        |       |
|-----------|--------|-------|
| Abrac1    | common | FALSE |
| Egflam    | common | FALSE |
| 4933407K1 | common | FALSE |
| Cog3      | common | FALSE |
| Skil      | common | FALSE |
| Ythdc1    | common | FALSE |
| Rps5      | common | FALSE |
| Abcf3     | common | FALSE |
| Usf2      | common | TRUE  |
| Pcyox1l   | common | FALSE |
| Slc12a2   | common | FALSE |
| Lman2     | common | FALSE |
| Ubr3      | common | FALSE |
| Dnttip1   | common | TRUE  |
| Morc4     | common | FALSE |
| Sugp1     | common | FALSE |
| Pard3     | common | FALSE |
| Zfyve26   | common | FALSE |
| Prex1     | common | FALSE |
| Upf3b     | common | FALSE |
| Ehd3      | common | FALSE |
| Asrgl1    | common | FALSE |
| Dgcr2     | common | FALSE |
| Phc1      | common | FALSE |
| Rap1b     | common | FALSE |
| Magi1     | common | FALSE |
| Med21     | common | FALSE |
| Chmp6     | common | FALSE |
| Actr2     | common | FALSE |
| Fbxl15    | common | FALSE |
| Bre       | common | FALSE |
| Tceb1     | common | FALSE |
| Hsd17b12  | common | FALSE |
| Ubl4      | common | FALSE |
| Ube2q2    | common | FALSE |
| Plekho1   | common | FALSE |
| Rps20     | common | FALSE |
| Ghr       | common | FALSE |
| Mfap1a    | common | FALSE |
| Map4k3    | common | FALSE |
| Rcor1     | common | TRUE  |
| Zcchc17   | common | TRUE  |
| Rab9      | common | FALSE |
| Cry2      | common | FALSE |
| Wnk1      | common | FALSE |
| Slc25a24  | common | FALSE |
| Edem3     | common | FALSE |
| Elf2      | common | TRUE  |
| Hhat      | common | TRUE  |
| Skiv2l    | common | FALSE |

|            |        |       |
|------------|--------|-------|
| Rilpl2     | common | FALSE |
| Wac        | common | FALSE |
| Myo5a      | common | FALSE |
| Kxd1       | common | FALSE |
| Uaca       | common | FALSE |
| Ano1       | common | FALSE |
| Phax       | common | FALSE |
| Vat1l      | common | FALSE |
| Ptgr1      | common | FALSE |
| Cntrob     | common | FALSE |
| Tnfrsf1a   | common | FALSE |
| Akna       | common | FALSE |
| Misp       | common | FALSE |
| Flii       | common | FALSE |
| Aldh5a1    | common | FALSE |
| Ccnjl      | common | FALSE |
| Slc27a6    | common | FALSE |
| Ranbp9     | common | FALSE |
| Gpaa1      | common | FALSE |
| 2610034B1  | common | FALSE |
| Sec63      | common | FALSE |
| Tor2a      | common | FALSE |
| Kctd10     | common | FALSE |
| Puf60      | common | FALSE |
| Faf2       | common | FALSE |
| Cyb5r3     | common | FALSE |
| Neto2      | common | FALSE |
| Tle4       | common | FALSE |
| D930015EC  | common | FALSE |
| Tpd52l2    | common | FALSE |
| Ccnt2      | common | TRUE  |
| Mvb12a     | common | FALSE |
| Mbnl1      | common | FALSE |
| Tsc2       | common | FALSE |
| Rbm4b      | common | FALSE |
| Gramd4     | common | FALSE |
| Dhdds      | common | FALSE |
| As3mt      | common | FALSE |
| Rab26os    | common | FALSE |
| Tmf1       | common | FALSE |
| Gm15421    | common | FALSE |
| Ptrhd1     | common | FALSE |
| St6galnac4 | common | FALSE |
| Mrps15     | common | FALSE |
| Maz        | common | TRUE  |
| 4921524J1  | common | FALSE |
| Nek7       | common | FALSE |
| Tmem129    | common | FALSE |
| Rbm41      | common | FALSE |
| Rbm25      | common | FALSE |



|           |        |       |
|-----------|--------|-------|
| Paf1      | common | FALSE |
| Golph3l   | common | FALSE |
| Pex11b    | common | FALSE |
| Dusp6     | common | FALSE |
| Rnf10     | common | FALSE |
| Mppe1     | common | FALSE |
| Tm9sf1    | common | FALSE |
| Crebzf    | common | TRUE  |
| Ergic2    | common | FALSE |
| Endov     | common | FALSE |
| Trim8     | common | FALSE |
| Ercc6     | common | FALSE |
| Zfp148    | common | TRUE  |
| Rps17     | common | FALSE |
| Ppp6r1    | common | FALSE |
| Ube2a     | common | FALSE |
| Lamb1     | common | FALSE |
| Nck2      | common | FALSE |
| Fam222b   | common | FALSE |
| Cpne3     | common | FALSE |
| Pdxdc1    | common | FALSE |
| Golga7    | common | FALSE |
| Snhg8     | common | FALSE |
| Cnot4     | common | TRUE  |
| 1810014BC | common | FALSE |
| Elmo2     | common | FALSE |
| Mrpl21    | common | FALSE |
| Traf4     | common | TRUE  |
| Rfx3      | common | TRUE  |
| Numa1     | common | FALSE |
| Uqcrc2    | common | FALSE |
| Pon2      | common | FALSE |
| Usp16     | common | FALSE |
| Uso1      | common | FALSE |
| Smad2     | common | TRUE  |
| Enc1      | common | FALSE |
| Zfp623    | common | TRUE  |
| Sec22a    | common | FALSE |
| B9d1      | common | FALSE |
| Itgb1bp1  | common | FALSE |
| Ralb      | common | FALSE |
| Ost4      | common | FALSE |
| Tceanc2   | common | FALSE |
| Stau1     | common | FALSE |
| Kctd1     | common | FALSE |
| Siah1a    | common | FALSE |
| 5530601HC | common | FALSE |
| Btbd2     | common | FALSE |
| Chm       | common | FALSE |
| Notch1    | common | FALSE |

|           |        |       |
|-----------|--------|-------|
| Ndst2     | common | FALSE |
| Rhog      | common | FALSE |
| Smurf1    | common | FALSE |
| Mnat1     | common | FALSE |
| Pomgnt1   | common | FALSE |
| Spg7      | common | FALSE |
| Trappc11  | common | FALSE |
| Bod1      | common | FALSE |
| LOC106740 | common | FALSE |
| Ctbp1     | common | TRUE  |
| Map4k5    | common | FALSE |
| Elk3      | common | TRUE  |
| Fbxl19    | common | TRUE  |
| Sgpl1     | common | FALSE |
| Slc43a3   | common | FALSE |
| Bag3      | common | FALSE |
| Ube2e1    | common | FALSE |
| Nsun4     | common | FALSE |
| Ebpl      | common | FALSE |
| Fam104a   | common | FALSE |
| Hspa13    | common | FALSE |
| Mapk1     | common | TRUE  |
| Mtss1l    | common | FALSE |
| Inpp1     | common | FALSE |
| Map1s     | common | FALSE |
| Skp1a     | common | FALSE |
| Igdcc4    | common | FALSE |
| Sox12     | common | TRUE  |
| Rpain     | common | FALSE |
| Commd5    | common | FALSE |
| Hsd17b10  | common | FALSE |
| St3gal4   | common | FALSE |
| Zbtb8os   | common | FALSE |
| Asxl2     | common | FALSE |
| Gna11     | common | FALSE |
| Emd       | common | FALSE |
| Lamc1     | common | FALSE |
| Zfand1    | common | FALSE |
| Fhod1     | common | FALSE |
| Sft2d2    | common | FALSE |
| Ncoa2     | common | FALSE |
| Dnajc30   | common | FALSE |
| Cenpb     | common | TRUE  |
| Rpn1      | common | FALSE |
| 2310009B1 | common | FALSE |
| Pddc1     | common | FALSE |
| Pcdh1     | common | FALSE |
| Fam126a   | common | FALSE |
| Copz2     | common | FALSE |
| Mmgt2     | common | FALSE |

|           |        |       |
|-----------|--------|-------|
| Pdcd5     | common | FALSE |
| Cyt11     | common | FALSE |
| Lsm5      | common | FALSE |
| Copg1     | common | FALSE |
| Psm2      | common | FALSE |
| Mthfd2l   | common | FALSE |
| Tmem5     | common | FALSE |
| Svil      | common | FALSE |
| Rfxank    | common | TRUE  |
| Timm10b   | common | FALSE |
| Rai1      | common | FALSE |
| Mbd3      | common | FALSE |
| Ehmt2     | common | FALSE |
| Pex7      | common | FALSE |
| BC005561  | common | TRUE  |
| Adamts1   | common | FALSE |
| Tfcp2     | common | TRUE  |
| Etv3      | common | TRUE  |
| Sap30bp   | common | FALSE |
| Gcc2      | common | FALSE |
| Trmu      | common | FALSE |
| Hps5      | common | FALSE |
| Acbd3     | common | FALSE |
| Prkag1    | common | FALSE |
| Fxyd3     | common | FALSE |
| Kdm2a     | common | TRUE  |
| Fam122a   | common | FALSE |
| Rnf38     | common | FALSE |
| Zfp664    | common | TRUE  |
| Rtf1      | common | FALSE |
| Stard5    | common | FALSE |
| Atp5f1    | common | FALSE |
| Ppp2r1a   | common | FALSE |
| 0610009B2 | common | FALSE |
| Suds3     | common | FALSE |
| Zkscan1   | common | TRUE  |
| Rps27l    | common | FALSE |
| Akt1      | common | FALSE |
| Tsr3      | common | FALSE |
| Fbxo44    | common | FALSE |
| Kdm1b     | common | FALSE |
| Sepn1     | common | FALSE |
| Ifnar1    | common | FALSE |
| Csnk1d    | common | FALSE |
| Adam10    | common | FALSE |
| Hdac2     | common | TRUE  |
| Rp2h      | common | FALSE |
| Kif1c     | common | FALSE |
| Zfp68     | common | FALSE |
| Csnk1a1   | common | FALSE |

|           |        |       |
|-----------|--------|-------|
| Pomt2     | common | FALSE |
| Man2b1    | common | FALSE |
| Atp6v0a2  | common | FALSE |
| 2610035D1 | common | FALSE |
| Snrpb2    | common | TRUE  |
| Pdia3     | common | FALSE |
| Eapp      | common | FALSE |
| Mlx       | common | TRUE  |
| Galnt4    | common | FALSE |
| Brd4      | common | FALSE |
| Arhgap35  | common | FALSE |
| Fnbp1l    | common | FALSE |
| Hhip      | common | FALSE |
| Galk2     | common | FALSE |
| Vash1     | common | FALSE |
| 2810403AC | common | TRUE  |
| Mir6910   | common | FALSE |
| Itpa      | common | FALSE |
| Ldlrap1   | common | FALSE |
| Dhrs3     | common | FALSE |
| 0610011F0 | common | FALSE |
| Pacsin3   | common | FALSE |
| Tmem43    | common | FALSE |
| Ostc      | common | FALSE |
| Mtfr1l    | common | FALSE |
| Psmb2     | common | FALSE |
| Chchd1    | common | FALSE |
| Ercc4     | common | FALSE |
| C2cd2     | common | FALSE |
| Mir6975   | common | FALSE |
| Rpl22     | common | FALSE |
| Ankrd39   | common | FALSE |
| Armcx4    | common | FALSE |
| Scai      | common | FALSE |
| 2810001G2 | common | FALSE |
| Adnp      | common | TRUE  |
| Gpr180    | common | FALSE |
| Btbd1     | common | FALSE |
| Chmp2b    | common | FALSE |
| Vps25     | common | FALSE |
| Stx16     | common | FALSE |
| Ptpn23    | common | FALSE |
| Whrn      | common | FALSE |
| Tmem237   | common | FALSE |
| Npm3      | common | FALSE |
| Stat6     | common | TRUE  |
| Zfp236    | common | TRUE  |
| Atad1     | common | FALSE |
| Dcaf4     | common | FALSE |
| 9930021J0 | common | FALSE |

|           |        |       |
|-----------|--------|-------|
| Myef2     | common | TRUE  |
| Extl3     | common | FALSE |
| Atg4a     | common | FALSE |
| Msi2      | common | TRUE  |
| Dedd      | common | FALSE |
| Tmem87a   | common | FALSE |
| Mir703    | common | FALSE |
| Sphk1     | common | FALSE |
| Cast      | common | FALSE |
| Gtf2b     | common | TRUE  |
| Gfpt1     | common | FALSE |
| Spns1     | common | FALSE |
| Cdan1     | common | FALSE |
| Atp11b    | common | FALSE |
| Stxbp3a   | common | FALSE |
| Decr2     | common | FALSE |
| St8sia5   | common | FALSE |
| Tram2     | common | FALSE |
| Pex3      | common | FALSE |
| Sppl3     | common | FALSE |
| Pop4      | common | FALSE |
| Zmat3     | common | FALSE |
| Zufsp     | common | FALSE |
| Ap2a2     | common | FALSE |
| Fastk     | common | FALSE |
| Mdm2      | common | TRUE  |
| Tada3     | common | FALSE |
| Mrps11    | common | FALSE |
| 3110040N1 | common | FALSE |
| Dgat1     | common | FALSE |
| Crtap     | common | FALSE |
| Cdk2ap2   | common | FALSE |
| Vwa8      | common | FALSE |
| Smpd2     | common | FALSE |
| Accs      | common | FALSE |
| Slc30a4   | common | FALSE |
| Man1c1    | common | FALSE |
| Lsm4      | common | FALSE |
| Luc7l2    | common | FALSE |
| Cnep1r1   | common | FALSE |
| Cep44     | common | FALSE |
| Capn7     | common | FALSE |
| Dennd4c   | common | FALSE |
| Sdcbp     | common | FALSE |
| Loxl2     | common | FALSE |
| Zfp952    | common | FALSE |
| Sox11     | common | TRUE  |
| Snrpc     | common | FALSE |
| Tns3      | common | FALSE |
| Tbc1d20   | common | FALSE |

|           |        |       |
|-----------|--------|-------|
| Ttc33     | common | FALSE |
| Ell       | common | FALSE |
| Fam13b    | common | FALSE |
| Rrnad1    | common | FALSE |
| Vasp      | common | FALSE |
| Tsn       | common | TRUE  |
| Tro       | common | FALSE |
| Ndufaf7   | common | FALSE |
| Sar1a     | common | FALSE |
| Rgs12     | common | FALSE |
| Pdzrn3    | common | FALSE |
| Fbxo18    | common | FALSE |
| Tmod3     | common | FALSE |
| Zfp292    | common | FALSE |
| Hspg2     | common | FALSE |
| Tcf7l2    | common | TRUE  |
| Tbx3      | common | TRUE  |
| Alg5      | common | FALSE |
| Zfp691    | common | TRUE  |
| Scoc      | common | FALSE |
| Kdm1a     | common | FALSE |
| Dll1      | common | FALSE |
| Zfp282    | common | TRUE  |
| Rpa3      | common | FALSE |
| Rab12     | common | FALSE |
| Cnih4     | common | FALSE |
| Zfp799    | common | FALSE |
| Vps13a    | common | FALSE |
| Ube2e3    | common | FALSE |
| Vps37a    | common | FALSE |
| Zbtb41    | common | TRUE  |
| Pelo      | common | FALSE |
| Hmg20a    | common | TRUE  |
| Bche      | common | FALSE |
| 1700030KC | common | FALSE |
| Inpp5e    | common | FALSE |
| Ptpmt1    | common | FALSE |
| Nrp       | common | FALSE |
| Gpsm1     | common | FALSE |
| Ift172    | common | FALSE |
| Nf1       | common | TRUE  |
| Tnrc18    | common | FALSE |
| Ikbip     | common | FALSE |
| Fam102a   | common | FALSE |
| Arhgef17  | common | FALSE |
| Ap1s2     | common | FALSE |
| 2310011J0 | common | TRUE  |
| Obsl1     | common | FALSE |
| Sec31a    | common | FALSE |
| Tjap1     | common | FALSE |

|           |        |       |
|-----------|--------|-------|
| Zfp532    | common | TRUE  |
| Azi2      | common | FALSE |
| Npm3-ps1  | common | FALSE |
| Nkiras2   | common | FALSE |
| Trim44    | common | FALSE |
| ler5      | common | FALSE |
| Sdhaf1    | common | FALSE |
| Ggcx      | common | FALSE |
| Wwc2      | common | FALSE |
| C1d       | common | FALSE |
| Dnmt3a    | common | TRUE  |
| Ccdc174   | common | FALSE |
| Zkscan3   | common | TRUE  |
| Ppp1r12a  | common | FALSE |
| Cnih1     | common | FALSE |
| Ptgr2     | common | FALSE |
| Mapk9     | common | FALSE |
| Zdhhc4    | common | FALSE |
| Mrpl32    | common | FALSE |
| Klhl7     | common | FALSE |
| Pcbd2     | common | FALSE |
| Pfkm      | common | FALSE |
| Pitpna    | common | FALSE |
| Tnpo2     | common | FALSE |
| F3        | common | FALSE |
| Apeh      | common | FALSE |
| Sgsm3     | common | FALSE |
| Wrnip1    | common | TRUE  |
| Strip1    | common | FALSE |
| 119000710 | common | FALSE |
| Efhd2     | common | FALSE |
| Clk4      | common | FALSE |
| Btf3l4    | common | FALSE |
| Arpc5l    | common | FALSE |
| Thoc2     | common | TRUE  |
| Arf4      | common | FALSE |
| Dnlz      | common | FALSE |
| Asb8      | common | FALSE |
| Nrbp1     | common | FALSE |
| 4930503E2 | common | FALSE |
| Marf1     | common | FALSE |
| 251003901 | common | FALSE |
| 1810043H  | common | FALSE |
| Atg101    | common | FALSE |
| Sirt6     | common | TRUE  |
| Adrbk1    | common | FALSE |
| Gstp1     | common | FALSE |
| Adprm     | common | FALSE |
| Prmt1     | common | FALSE |
| Vgll4     | common | FALSE |

|           |        |       |
|-----------|--------|-------|
| Coq9      | common | FALSE |
| Clptm1l   | common | FALSE |
| Alkbh3    | common | FALSE |
| Ikbkb     | common | FALSE |
| Asna1     | common | FALSE |
| Lyn       | common | FALSE |
| Upf3a     | common | FALSE |
| Dnajc24   | common | FALSE |
| Timm22    | common | FALSE |
| Vps45     | common | FALSE |
| Tfe3      | common | TRUE  |
| Tmem175   | common | FALSE |
| Foxk1     | common | TRUE  |
| Rnf7      | common | FALSE |
| Ubn1      | common | FALSE |
| Bcas2     | common | FALSE |
| Hexim1    | common | FALSE |
| Ptpru     | common | FALSE |
| Slc12a4   | common | FALSE |
| Acot2     | common | FALSE |
| Zfp444    | common | TRUE  |
| Stard3    | common | FALSE |
| Spin1     | common | FALSE |
| Vps51     | common | FALSE |
| Chrac1    | common | FALSE |
| Wdr83     | common | TRUE  |
| Paox      | common | FALSE |
| Hdac7     | common | FALSE |
| Lpar4     | common | FALSE |
| Arfgap1   | common | TRUE  |
| Slc35f5   | common | FALSE |
| Dlg5      | common | FALSE |
| Akirin1   | common | FALSE |
| Zc4h2     | common | FALSE |
| Dnmbp     | common | FALSE |
| Tmem218   | common | FALSE |
| Spast     | common | FALSE |
| Dkk2      | common | FALSE |
| Sfr1      | common | FALSE |
| Prickle1  | common | FALSE |
| Etv4      | common | TRUE  |
| Tnfaip8l1 | common | FALSE |
| Prkaa1    | common | TRUE  |
| Bloc1s2   | common | FALSE |
| Enthd2    | common | FALSE |
| Kif13a    | common | FALSE |
| Fnip2     | common | FALSE |
| Dapk3     | common | FALSE |
| Gbf1      | common | FALSE |
| Commd2    | common | FALSE |



|           |        |       |
|-----------|--------|-------|
| Epc2      | common | FALSE |
| 4933434E2 | common | FALSE |
| Spin4     | common | FALSE |
| Usp22     | common | FALSE |
| Cdh24     | common | FALSE |
| Snx12     | common | FALSE |
| Mfap3     | common | FALSE |
| Ino80b    | common | FALSE |
| Stx6      | common | FALSE |
| Zscan26   | common | TRUE  |
| Mast4     | common | FALSE |
| Abhd14a   | common | FALSE |
| Ccdc34    | common | FALSE |
| Plod3     | common | FALSE |
| Magi3     | common | FALSE |
| Phldb1    | common | FALSE |
| Ifi30     | common | FALSE |
| Ppp1r14b  | common | FALSE |
| Wipf1     | common | FALSE |
| Sec22b    | common | FALSE |
| Clasrp    | common | FALSE |
| Pdzd11    | common | FALSE |
| Xist      | common | FALSE |
| Uba5      | common | FALSE |
| Sh2b3     | common | FALSE |
| 2610020CC | common | FALSE |
| Sesn3     | common | FALSE |
| Tmem60    | common | FALSE |
| Cwc25     | common | FALSE |
| 3110062M  | common | FALSE |
| Hey1      | common | TRUE  |
| Mrps26    | common | FALSE |
| Chic2     | common | FALSE |
| Tpra1     | common | FALSE |
| Rhob      | common | FALSE |
| Hipk1     | common | FALSE |
| Tvp23a    | common | FALSE |
| Cat       | common | TRUE  |
| Gipc1     | common | FALSE |
| Rragc     | common | FALSE |
| Nsa2      | common | FALSE |
| Vipas39   | common | FALSE |
| Lats1     | common | FALSE |
| Nova1     | common | FALSE |
| Derl2     | common | FALSE |
| Amdhd2    | common | FALSE |
| Pogk      | common | FALSE |
| Tmem64    | common | FALSE |
| Etv5      | common | TRUE  |
| Bin3      | common | FALSE |

|          |        |       |
|----------|--------|-------|
| Tbc1d9b  | common | FALSE |
| Esd      | common | FALSE |
| Strn3    | common | FALSE |
| Trrap    | common | FALSE |
| H6pd     | common | FALSE |
| Dnajb4   | common | FALSE |
| Bptf     | common | TRUE  |
| Dusp16   | common | FALSE |
| Fermt2   | common | FALSE |
| Grtp1    | common | FALSE |
| Cib1     | common | FALSE |
| Zfp738   | common | FALSE |
| Eif2ak2  | common | FALSE |
| Oxr1     | common | FALSE |
| Pigx     | common | FALSE |
| lspd     | common | FALSE |
| Pan3     | common | FALSE |
| Car12    | common | FALSE |
| Sugp2    | common | FALSE |
| Rsf1     | common | FALSE |
| Dcaf7    | common | FALSE |
| Tomm34   | common | FALSE |
| Rnf166   | common | FALSE |
| B230118H | common | FALSE |
| Ppt2     | common | FALSE |
| Akr1b8   | common | FALSE |
| Proser3  | common | FALSE |
| Herc2    | common | FALSE |
| Ufm1     | common | FALSE |
| Mex3a    | common | FALSE |
| Cnot6l   | common | FALSE |
| Acadsb   | common | FALSE |
| Klhl23   | common | FALSE |
| Pigv     | common | FALSE |
| Med10    | common | FALSE |
| 60304070 | common | FALSE |
| Pygb     | common | FALSE |
| 9030624J | common | FALSE |
| Mob3a    | common | FALSE |
| Rchy1    | common | FALSE |
| Thoc7    | common | FALSE |
| Cep350   | common | FALSE |
| Golga1   | common | FALSE |
| Lime1    | common | FALSE |
| Zswim4   | common | FALSE |
| Sh2b1    | common | FALSE |
| Tanc1    | common | FALSE |
| Jak1     | common | FALSE |
| Elk1     | common | TRUE  |
| Mef2c    | common | TRUE  |

|           |        |       |
|-----------|--------|-------|
| Lrch3     | common | FALSE |
| Cep112    | common | FALSE |
| Polk      | common | FALSE |
| Abhd10    | common | FALSE |
| Cyb561a3  | common | FALSE |
| Slc10a7   | common | FALSE |
| Ahsa2     | common | FALSE |
| Hsd17b4   | common | FALSE |
| Ckap4     | common | FALSE |
| Fam50a    | common | FALSE |
| Psmc9     | common | FALSE |
| Anapc2    | common | FALSE |
| Gstt2     | common | FALSE |
| Zfp27     | common | TRUE  |
| Urm1      | common | FALSE |
| Arhgap42  | common | FALSE |
| Tmem214   | common | FALSE |
| Vhl       | common | FALSE |
| Fyn       | common | FALSE |
| Ctdnep1   | common | FALSE |
| 4632427E1 | common | FALSE |
| Zfp865    | common | FALSE |
| Ric8b     | common | FALSE |
| Tmem150a  | common | FALSE |
| Txn1      | common | FALSE |
| Casp6     | common | FALSE |
| Leprel2   | common | FALSE |
| Gfra2     | common | FALSE |
| Numb      | common | FALSE |
| 4931406P1 | common | FALSE |
| Gpr137b-p | common | FALSE |
| Prkcsb    | common | FALSE |
| Crkl      | common | FALSE |
| Tet1      | common | TRUE  |
| Zmiz1     | common | TRUE  |
| Lcmt1     | common | FALSE |
| Spty2d1   | common | FALSE |
| Arhgap1   | common | FALSE |
| Gpx8      | common | FALSE |
| Zcchc6    | common | FALSE |
| Ctbs      | common | FALSE |
| Edem2     | common | FALSE |
| Zfr       | common | FALSE |
| Gpr107    | common | FALSE |
| Ppp2r4    | common | FALSE |
| Nol4l     | common | FALSE |
| Gpbp1l1   | common | FALSE |
| Chpt1     | common | FALSE |
| Mxra7     | common | FALSE |
| Msantd4   | common | FALSE |

|           |        |       |
|-----------|--------|-------|
| Cmas      | common | FALSE |
| Cdc42bpb  | common | FALSE |
| Letmd1    | common | FALSE |
| Tmem173   | common | FALSE |
| Slc6a8    | common | FALSE |
| Wdr60     | common | FALSE |
| Arl15     | common | FALSE |
| 17000860C | common | FALSE |
| Arhgef10  | common | FALSE |
| Cops6     | common | FALSE |
| Smad7     | common | TRUE  |
| Pot1b     | common | FALSE |
| Ankrd16   | common | FALSE |
| Eif4g3    | common | FALSE |
| Cby1      | common | FALSE |
| Rps29     | common | FALSE |
| Ctdsp2    | common | FALSE |
| Fech      | common | FALSE |
| Ppp1r35   | common | FALSE |
| Prrc2a    | common | FALSE |
| Mpv17     | common | FALSE |
| Hars2     | common | FALSE |
| Glt25d1   | common | FALSE |
| Akr1b10   | common | FALSE |
| Ankrd54   | common | FALSE |
| BC003331  | common | FALSE |
| Zfp319    | common | TRUE  |
| Lman2l    | common | FALSE |
| Mid1      | common | FALSE |
| Lsamp     | common | FALSE |
| 0610037L1 | common | FALSE |
| Btrc      | common | FALSE |
| Crebbp    | common | FALSE |
| Ptpn9     | common | FALSE |
| Lgi4      | common | FALSE |
| Igf1r     | common | FALSE |
| Laptm5    | common | FALSE |
| Ensa      | common | FALSE |
| Frk       | common | FALSE |
| D630003M  | common | FALSE |
| Uqcrc1    | common | FALSE |
| Sep-07    | common | FALSE |
| Aldh1l2   | common | FALSE |
| Tbl1xr1   | common | TRUE  |
| Ifnar2    | common | FALSE |
| Usp49     | common | FALSE |
| Ppp2cb    | common | FALSE |
| Gulp1     | common | FALSE |
| Fcho2     | common | FALSE |
| Apc       | common | FALSE |

|           |        |       |
|-----------|--------|-------|
| Arvcf     | common | FALSE |
| Sfrp1     | common | FALSE |
| Prdx4     | common | FALSE |
| Ankib1    | common | FALSE |
| Sike1     | common | FALSE |
| Tmem136   | common | FALSE |
| Igfbp5    | common | FALSE |
| Ttc8      | common | FALSE |
| Dstyk     | common | FALSE |
| Fam193a   | common | FALSE |
| Suv420h2  | common | FALSE |
| Ust       | common | FALSE |
| Gpsm3     | common | FALSE |
| Ctdsp1    | common | FALSE |
| Kdelr2    | common | FALSE |
| Ptges3l   | common | FALSE |
| Acaa2     | common | FALSE |
| Zeb2os    | common | FALSE |
| Irak4     | common | FALSE |
| Bmf       | common | FALSE |
| Acvr1     | common | FALSE |
| Kmt2b     | common | FALSE |
| Cers5     | common | TRUE  |
| Dnaic2    | common | FALSE |
| Wdr8      | common | FALSE |
| Agpat2    | common | FALSE |
| Bud31     | common | FALSE |
| Gpr17     | common | FALSE |
| Pomp      | common | FALSE |
| Gltscr1   | common | FALSE |
| Rnf25     | common | FALSE |
| Dsel      | common | FALSE |
| Tm2d3     | common | FALSE |
| Acin1     | common | FALSE |
| Dock6     | common | FALSE |
| Arhgef12  | common | FALSE |
| Rhou      | common | FALSE |
| Lrrk1     | common | FALSE |
| Snhg18    | common | FALSE |
| Lims1     | common | FALSE |
| Dhx57     | common | FALSE |
| Eef2      | common | FALSE |
| Sep-01    | common | FALSE |
| Ccdc97    | common | FALSE |
| Rab3gap1  | common | FALSE |
| 4931406H2 | common | FALSE |
| Ick       | common | FALSE |
| Tpmt      | common | FALSE |
| 4933431E2 | common | FALSE |
| Ppt1      | common | FALSE |

|          |        |       |
|----------|--------|-------|
| Pccb     | common | FALSE |
| Vma21    | common | FALSE |
| Ppapdc1b | common | FALSE |
| Atrn     | common | FALSE |
| Mrps18a  | common | FALSE |
| Stxbp3b  | common | FALSE |
| Rev3l    | common | FALSE |
| Yipf1    | common | FALSE |
| Tor1a    | common | FALSE |
| Lsm1     | common | FALSE |
| Usp19    | common | FALSE |
| Ppp1r12c | common | FALSE |
| Panx1    | common | FALSE |
| Snrpd2   | common | FALSE |
| Mrps16   | common | FALSE |
| Taz      | common | FALSE |
| Polm     | common | FALSE |
| Zcchc24  | common | FALSE |
| Brf1     | common | TRUE  |
| Oraov1   | common | FALSE |
| Nprl2    | common | FALSE |
| Lym4     | common | FALSE |
| Tnrc6a   | common | FALSE |
| Taok2    | common | FALSE |
| Setd1b   | common | FALSE |
| Ankmy2   | common | FALSE |
| Slc39a7  | common | FALSE |
| Tfpi     | common | FALSE |
| Mcur1    | common | FALSE |
| Col5a1   | common | FALSE |
| Ap5z1    | common | FALSE |
| Cenpt    | common | FALSE |
| Ago1     | common | FALSE |
| Zfp276   | common | TRUE  |
| Nkain4   | common | FALSE |
| Pkn1     | common | FALSE |
| Tbcel    | common | FALSE |
| Lxn      | common | FALSE |
| Plxnb1   | common | FALSE |
| Ube2r2   | common | FALSE |
| Fads2    | common | FALSE |
| Gucd1    | common | FALSE |
| Metap1d  | common | FALSE |
| Abcd3    | common | FALSE |
| Wash     | common | FALSE |
| Rnf122   | common | FALSE |
| Sarnp    | common | FALSE |
| Rabgap1  | common | FALSE |
| Pdcd10   | common | FALSE |
| Fbxl6    | common | FALSE |

|           |        |       |
|-----------|--------|-------|
| Gtf2i     | common | TRUE  |
| Rgl2      | common | FALSE |
| Nelfcd    | common | FALSE |
| 1600012HC | common | FALSE |
| Rps10     | common | TRUE  |
| Ptpra     | common | FALSE |
| Pcmdt1    | common | FALSE |
| Pigs      | common | FALSE |
| Wdpcp     | common | FALSE |
| E130307A1 | common | FALSE |
| Arhgef40  | common | FALSE |
| Snhg6     | common | FALSE |
| Tex261    | common | FALSE |
| Smim8     | common | FALSE |
| Ykt6      | common | FALSE |
| Kcnq1ot1  | common | FALSE |
| Exoc6     | common | FALSE |
| Ncoa4     | common | FALSE |
| Cmtm8     | common | FALSE |
| Fam196a   | common | FALSE |
| Rps9      | common | FALSE |
| Ndufa9    | common | FALSE |
| Orai1     | common | FALSE |
| Sec23a    | common | FALSE |
| Pvr       | common | FALSE |
| Atp9b     | common | FALSE |
| Ndufa10   | common | FALSE |
| Man2a2    | common | FALSE |
| Fkbp14    | common | FALSE |
| Agl       | common | FALSE |
| Sh3pxd2b  | common | FALSE |
| Nek8      | common | FALSE |
| Tenm3     | common | FALSE |
| Gstk1     | common | FALSE |
| Mef2a     | common | TRUE  |
| Unk       | common | FALSE |
| Timm17b   | common | FALSE |
| Hook3     | common | FALSE |
| Mllt6     | common | FALSE |
| Pdap1     | common | FALSE |
| 3110056K0 | common | FALSE |
| Elf1      | common | TRUE  |
| Tmem242   | common | FALSE |
| Bnip3l    | common | FALSE |
| Slc25a20  | common | FALSE |
| Sfswap    | common | FALSE |
| 261050710 | common | FALSE |
| Echs1     | common | FALSE |
| Hsf2      | common | TRUE  |
| Pip4k2c   | common | FALSE |

|           |        |       |
|-----------|--------|-------|
| Mrpl57    | common | FALSE |
| Tatdn3    | common | FALSE |
| Arrdc3    | common | FALSE |
| Chmp4b    | common | FALSE |
| Trim56    | common | FALSE |
| Hdhd2     | common | FALSE |
| Smap1     | common | FALSE |
| Ube2j1    | common | FALSE |
| Tbc1d10a  | common | FALSE |
| Rhobtb1   | common | FALSE |
| Leprel4   | common | FALSE |
| Col11a1   | common | FALSE |
| Btbd9     | common | FALSE |
| Id1       | common | TRUE  |
| Fam178b   | common | FALSE |
| Mrps17    | common | FALSE |
| Proser1   | common | FALSE |
| Dbi       | common | FALSE |
| Map2k7    | common | FALSE |
| Golgb1    | common | FALSE |
| Gpx1      | common | FALSE |
| Dctn4     | common | FALSE |
| Rab22a    | common | FALSE |
| Cdh2      | common | FALSE |
| Fam117a   | common | FALSE |
| Morf4l1   | common | FALSE |
| Ngly1     | common | FALSE |
| Psemb6    | common | FALSE |
| Osbpl7    | common | FALSE |
| Rfx5      | common | TRUE  |
| Efemp2    | common | FALSE |
| Commd9    | common | FALSE |
| Zfc3h1    | common | FALSE |
| Rgcc      | common | FALSE |
| Selo      | common | FALSE |
| Zfp57     | common | TRUE  |
| Sri       | common | FALSE |
| 2610008E1 | common | FALSE |
| Rab18     | common | TRUE  |
| Pcgf5     | common | FALSE |
| Syk       | common | FALSE |
| Limch1    | common | FALSE |
| Sntb1     | common | FALSE |
| Ano6      | common | FALSE |
| Baiap2l2  | common | FALSE |
| Arhgef10l | common | FALSE |
| 2010320M  | common | FALSE |
| Lifr      | common | FALSE |
| Tspan14   | common | FALSE |
| Lrrc8d    | common | FALSE |



|           |        |       |
|-----------|--------|-------|
| Nbas      | common | FALSE |
| Rheb      | common | FALSE |
| Mknk1     | common | FALSE |
| Chmp1a    | common | FALSE |
| Igfbp3    | common | FALSE |
| Cmtm3     | common | FALSE |
| Kdm5b     | common | TRUE  |
| Suv420h1  | common | FALSE |
| Mme       | common | FALSE |
| Bnip2     | common | FALSE |
| Osgep     | common | FALSE |
| Zmat2     | common | TRUE  |
| Mdp1      | common | FALSE |
| Fgd5      | common | FALSE |
| Lrrc20    | common | FALSE |
| Rps6kb2   | common | FALSE |
| Epc1      | common | FALSE |
| Gstz1     | common | FALSE |
| Fam132a   | common | FALSE |
| Smad6     | common | TRUE  |
| Ift27     | common | FALSE |
| Tradd     | common | FALSE |
| Tmco1     | common | FALSE |
| Wdr26     | common | FALSE |
| Mmp17     | common | FALSE |
| Pim3      | common | FALSE |
| Igsf11    | common | FALSE |
| Slc35e3   | common | FALSE |
| Mrps34    | common | FALSE |
| Zc3h7b    | common | FALSE |
| Casc4     | common | FALSE |
| Lmf2      | common | FALSE |
| Glrx      | common | FALSE |
| Scnm1     | common | FALSE |
| Pde5a     | common | FALSE |
| Kifc3     | common | FALSE |
| Antxr1    | common | FALSE |
| Tmppe     | common | FALSE |
| Srr       | common | FALSE |
| Lgr4      | common | FALSE |
| Pigc      | common | FALSE |
| Fbxw17    | common | FALSE |
| Saysd1    | common | FALSE |
| Ypel1     | common | FALSE |
| Tmem230   | common | FALSE |
| Gm14325   | common | TRUE  |
| Ugp2      | common | TRUE  |
| Ubr4      | common | FALSE |
| Mgea5     | common | FALSE |
| 9530068E0 | common | FALSE |

|           |        |       |
|-----------|--------|-------|
| Zfp329    | common | TRUE  |
| BC024978  | common | FALSE |
| Gab1      | common | FALSE |
| Ppil2     | common | FALSE |
| Ppm1b     | common | FALSE |
| Frem2     | common | FALSE |
| 4833420G1 | common | FALSE |
| Adamts6   | common | FALSE |
| 2610001J0 | common | FALSE |
| Angptl2   | common | FALSE |
| Mmp16     | common | FALSE |
| Klf3      | common | TRUE  |
| Bfar      | common | FALSE |
| Sorcs2    | common | FALSE |
| Mmp2      | common | FALSE |
| Adamts10  | common | FALSE |
| Plac1     | common | FALSE |
| Lix1l     | common | FALSE |
| Dync1li2  | common | FALSE |
| Ccdc167   | common | FALSE |
| Thap7     | common | FALSE |
| 2310009AC | common | FALSE |
| 3830406C1 | common | FALSE |
| Ifit2     | common | FALSE |
| Myo1c     | common | FALSE |
| Chn2      | common | FALSE |
| Ddah1     | common | FALSE |
| Insig2    | common | FALSE |
| Pabpn1    | common | FALSE |
| Tmem261   | common | FALSE |
| Fbxw7     | common | FALSE |
| Deb1      | common | FALSE |
| Rbm18     | common | FALSE |
| Alkbh6    | common | FALSE |
| Cttn      | common | FALSE |
| Zfp1      | common | FALSE |
| Mecp2     | common | TRUE  |
| Ctso      | common | FALSE |
| Kiz       | common | FALSE |
| Rab4a     | common | FALSE |
| Klhl36    | common | FALSE |
| Aldh6a1   | common | FALSE |
| Ccdc78    | common | FALSE |
| Elmod2    | common | FALSE |
| Vimp      | common | FALSE |
| Zmat5     | common | FALSE |
| Rpl35a    | common | FALSE |
| Pitpnc1   | common | FALSE |
| Zc3h11a   | common | TRUE  |
| Tlcd2     | common | FALSE |

|           |        |       |
|-----------|--------|-------|
| Fbn1      | common | FALSE |
| Col25a1   | common | FALSE |
| Bag1      | common | FALSE |
| Cnot8     | common | FALSE |
| Paqr4     | common | FALSE |
| Rhoj      | common | FALSE |
| Vps41     | common | FALSE |
| Arglu1    | common | FALSE |
| Blvra     | common | FALSE |
| Rictor    | common | FALSE |
| Rps15a    | common | FALSE |
| Pbrm1     | common | FALSE |
| Trim41    | common | FALSE |
| Thap3     | common | FALSE |
| Unc50     | common | FALSE |
| Clmn      | common | FALSE |
| Mamdc2    | common | FALSE |
| Adamts12  | common | FALSE |
| Etfdh     | common | FALSE |
| Cmc1      | common | FALSE |
| Itgb5     | common | FALSE |
| Szt2      | common | FALSE |
| Irs1      | common | FALSE |
| Tmed2     | common | FALSE |
| Cyp39a1   | common | FALSE |
| Cryl1     | common | FALSE |
| Rps16     | common | FALSE |
| Slirp     | common | FALSE |
| Tmem179t  | common | FALSE |
| Tmem80    | common | FALSE |
| Colgalt2  | common | FALSE |
| 1110059G1 | common | FALSE |
| Fahd2a    | common | FALSE |
| 2700089E2 | common | FALSE |
| Fblim1    | common | FALSE |
| Iah1      | common | FALSE |
| Fnbp1     | common | FALSE |
| Prpf40b   | common | FALSE |
| Pdcd6     | common | FALSE |
| Rn45s     | common | FALSE |
| Wbp4      | common | FALSE |
| Ccdc12    | common | FALSE |
| Arhgef16  | common | FALSE |
| Agpat3    | common | FALSE |
| Fam229b   | common | FALSE |
| Ptpn6     | common | FALSE |
| Stk16     | common | FALSE |
| Becn1     | common | FALSE |
| Ptp4a3    | common | FALSE |
| Exoc7     | common | FALSE |

|          |        |       |
|----------|--------|-------|
| Rab5a    | common | FALSE |
| Mrpl30   | common | FALSE |
| Mpdu1    | common | FALSE |
| Pias3    | common | FALSE |
| Pgap3    | common | FALSE |
| R3hdm2   | common | TRUE  |
| Rbm4     | common | FALSE |
| Synj2    | common | FALSE |
| Afap1l1  | common | FALSE |
| Galnt2   | common | FALSE |
| Csad     | common | FALSE |
| Rplp2    | common | FALSE |
| Zmym3    | common | FALSE |
| Dock7    | common | FALSE |
| Son      | common | FALSE |
| Gstm5    | common | FALSE |
| Wsb1     | common | FALSE |
| Yipf5    | common | FALSE |
| Ankrd23  | common | FALSE |
| Hunk     | common | FALSE |
| Dvl3     | common | FALSE |
| Wasf2    | common | FALSE |
| Tmem198t | common | FALSE |
| Smарcb1  | common | TRUE  |
| Spry4    | common | FALSE |
| Shisa2   | common | FALSE |
| Tpcn2    | common | FALSE |
| Msl1     | common | FALSE |
| Tcn2     | common | FALSE |
| Zfp866   | common | TRUE  |
| Npepl1   | common | FALSE |
| Picalm   | common | FALSE |
| Lrrc45   | common | FALSE |
| Brms1l   | common | FALSE |
| Ppp1r9b  | common | FALSE |
| Rnpepl1  | common | FALSE |
| Rsrc2    | common | FALSE |
| Jarid2   | common | FALSE |
| D17Wsu10 | common | FALSE |
| Spag7    | common | TRUE  |
| Tmem170t | common | FALSE |
| Stard13  | common | FALSE |
| Phf21a   | common | TRUE  |
| Arhgef11 | common | FALSE |
| Dbnl     | common | FALSE |
| Mrps12   | common | FALSE |
| Gm15545  | common | FALSE |
| Ccdc13   | common | FALSE |
| Poln     | common | FALSE |
| Vps37b   | common | FALSE |

|           |        |       |
|-----------|--------|-------|
| Aida      | common | FALSE |
| Ltbp1     | common | FALSE |
| Jmjd7     | common | FALSE |
| Akr1e1    | common | FALSE |
| Hmga2-ps1 | common | FALSE |
| Whsc1l1   | common | FALSE |
| Igdcc3    | NCC    | FALSE |
| Grrp1     | NCC    | FALSE |
| Plcg2     | NCC    | FALSE |
| Fndc3c1   | NCC    | FALSE |
| Ipo5      | NCC    | FALSE |
| Lin28a    | NCC    | TRUE  |
| Prtg      | NCC    | FALSE |
| Sep-11    | NCC    | FALSE |
| Trim71    | NCC    | FALSE |
| Psat1     | NCC    | FALSE |
| Vars      | NCC    | FALSE |
| Robo1     | NCC    | FALSE |
| Shmt1     | NCC    | FALSE |
| Hk2       | NCC    | FALSE |
| E130012A1 | NCC    | FALSE |
| Lin28b    | NCC    | TRUE  |
| Tnfrsf19  | NCC    | FALSE |
| Pax3      | NCC    | TRUE  |
| Mthfd1    | NCC    | TRUE  |
| Ddx21     | NCC    | FALSE |
| Nop2      | NCC    | FALSE |
| Gart      | NCC    | FALSE |
| Dctd      | NCC    | FALSE |
| Slc16a1   | NCC    | FALSE |
| Exo1      | NCC    | FALSE |
| Heatr1    | NCC    | FALSE |
| Sall4     | NCC    | TRUE  |
| Bub1      | NCC    | FALSE |
| Pkm       | NCC    | TRUE  |
| Lhpp      | NCC    | FALSE |
| Cct6a     | NCC    | FALSE |
| Nsun2     | NCC    | FALSE |
| Nolc1     | NCC    | FALSE |
| Fam89a    | NCC    | FALSE |
| Slc2a1    | NCC    | FALSE |
| Ldha      | NCC    | FALSE |
| Mcm10     | NCC    | FALSE |
| Nop56     | NCC    | FALSE |
| Gemin5    | NCC    | FALSE |
| Sdad1     | NCC    | FALSE |
| Grwd1     | NCC    | FALSE |
| Fkbp4     | NCC    | FALSE |
| Prmt5     | NCC    | FALSE |
| Ttll4     | NCC    | FALSE |

|           |     |       |
|-----------|-----|-------|
| Lbr       | NCC | FALSE |
| Hsph1     | NCC | FALSE |
| Tomm70a   | NCC | FALSE |
| Atic      | NCC | FALSE |
| Hspa9     | NCC | FALSE |
| Pprc1     | NCC | FALSE |
| Cecr2     | NCC | FALSE |
| Dnmt3b    | NCC | FALSE |
| Lama1     | NCC | FALSE |
| Ctps      | NCC | FALSE |
| Srm       | NCC | FALSE |
| Suv39h2   | NCC | FALSE |
| Gemin4    | NCC | FALSE |
| Bcat1     | NCC | FALSE |
| Sfrp2     | NCC | FALSE |
| Stip1     | NCC | FALSE |
| Cdv3      | NCC | FALSE |
| Gpsm2     | NCC | FALSE |
| Trip13    | NCC | FALSE |
| Melk      | NCC | FALSE |
| Ivns1abp  | NCC | FALSE |
| Sdc1      | NCC | FALSE |
| Abcf2     | NCC | TRUE  |
| Plk1      | NCC | FALSE |
| Cct5      | NCC | FALSE |
| Aurka     | NCC | FALSE |
| Aldh1a2   | NCC | FALSE |
| Rrp12     | NCC | FALSE |
| Crabp1    | NCC | FALSE |
| Polr1b    | NCC | FALSE |
| Bop1      | NCC | FALSE |
| Seh1l     | NCC | FALSE |
| C1qbp     | NCC | FALSE |
| Espl1     | NCC | FALSE |
| Asf1b     | NCC | FALSE |
| 2700038G2 | NCC | FALSE |
| Rrs1      | NCC | FALSE |
| Nek2      | NCC | FALSE |
| Tcf7      | NCC | TRUE  |
| Fgfr2     | NCC | FALSE |
| Ppm1g     | NCC | FALSE |
| Arid3a    | NCC | TRUE  |
| Iars      | NCC | FALSE |
| Wdhd1     | NCC | FALSE |
| Erc6l     | NCC | FALSE |
| Haus6     | NCC | FALSE |
| Cdc6      | NCC | FALSE |
| Spsb4     | NCC | FALSE |
| Dis3      | NCC | TRUE  |
| Pknox2    | NCC | TRUE  |

|          |     |       |
|----------|-----|-------|
| Mina     | NCC | FALSE |
| Mob3b    | NCC | FALSE |
| Incenp   | NCC | FALSE |
| Tfap2b   | NCC | TRUE  |
| Nup107   | NCC | TRUE  |
| Kif2c    | NCC | FALSE |
| Ect2     | NCC | FALSE |
| Rcl1     | NCC | FALSE |
| Pphln1   | NCC | FALSE |
| Dars     | NCC | FALSE |
| Wfikkn1  | NCC | FALSE |
| Ticrr    | NCC | FALSE |
| Spag5    | NCC | FALSE |
| Eme1     | NCC | FALSE |
| Cbx2     | NCC | FALSE |
| Blm      | NCC | FALSE |
| Foxm1    | NCC | TRUE  |
| Nr6a1    | NCC | TRUE  |
| Wee1     | NCC | FALSE |
| Rad51    | NCC | FALSE |
| Pkdcc    | NCC | FALSE |
| Ska3     | NCC | FALSE |
| Polr3g   | NCC | TRUE  |
| Cdc45    | NCC | FALSE |
| Cdc25c   | NCC | FALSE |
| Sgol1    | NCC | FALSE |
| Nat10    | NCC | FALSE |
| Mybl2    | NCC | TRUE  |
| Plk4     | NCC | FALSE |
| Utp15    | NCC | FALSE |
| Wdr36    | NCC | FALSE |
| B3gnt5   | NCC | FALSE |
| Aurkb    | NCC | FALSE |
| Dars2    | NCC | FALSE |
| BC055324 | NCC | FALSE |
| Tsr1     | NCC | FALSE |
| Psm1     | NCC | FALSE |
| Brca1    | NCC | TRUE  |
| Eprs     | NCC | FALSE |
| Ipo4     | NCC | FALSE |
| Prdx6    | NCC | FALSE |
| Tjp2     | NCC | FALSE |
| Ccdc86   | NCC | FALSE |
| Rrp1b    | NCC | FALSE |
| Ipo7     | NCC | FALSE |
| Ccnf     | NCC | FALSE |
| Slc1a3   | NCC | FALSE |
| Fam64a   | NCC | FALSE |
| Cep78    | NCC | FALSE |
| Eif1a    | NCC | FALSE |

|           |     |       |
|-----------|-----|-------|
| Chaf1b    | NCC | FALSE |
| Tbrg4     | NCC | FALSE |
| Mn1       | NCC | FALSE |
| Mcm8      | NCC | FALSE |
| C330027CC | NCC | FALSE |
| Fbxo5     | NCC | FALSE |
| Nsl1      | NCC | FALSE |
| Swap70    | NCC | FALSE |
| Lrrc59    | NCC | FALSE |
| Nmnat2    | NCC | FALSE |
| Zwilch    | NCC | FALSE |
| Wdr75     | NCC | FALSE |
| Anln      | NCC | FALSE |
| Ddx20     | NCC | TRUE  |
| Scd1      | NCC | FALSE |
| Snai1     | NCC | TRUE  |
| Ralgps2   | NCC | FALSE |
| Entpd6    | NCC | FALSE |
| D19Bwg13  | NCC | FALSE |
| Ttk       | NCC | FALSE |
| Rps6ka1   | NCC | FALSE |
| Dlgap5    | NCC | FALSE |
| Tfrc      | NCC | FALSE |
| Fgfr1op   | NCC | FALSE |
| Itga9     | NCC | FALSE |
| Kif11     | NCC | FALSE |
| Zfp593    | NCC | FALSE |
| Lyar      | NCC | FALSE |
| Suv39h1   | NCC | FALSE |
| 311008211 | NCC | FALSE |
| Cacybp    | NCC | FALSE |
| Ddx51     | NCC | FALSE |
| Chek2     | NCC | FALSE |
| Prps1     | NCC | FALSE |
| Cdca5     | NCC | FALSE |
| Greb1l    | NCC | FALSE |
| Mir17hg   | NCC | FALSE |
| Actn1     | NCC | FALSE |
| Mars      | NCC | FALSE |
| Tfap4     | NCC | TRUE  |
| Zfp280c   | NCC | FALSE |
| Cenpf     | NCC | FALSE |
| Meis2     | NCC | TRUE  |
| Kpna1     | NCC | FALSE |
| Ncapg2    | NCC | FALSE |
| Mphosph1  | NCC | FALSE |
| Ak4       | NCC | FALSE |
| Utp18     | NCC | TRUE  |
| Acly      | NCC | FALSE |
| Metap2    | NCC | FALSE |



|          |     |       |
|----------|-----|-------|
| Mettl13  | NCC | FALSE |
| Rad54l   | NCC | FALSE |
| Wdr3     | NCC | FALSE |
| Wdr12    | NCC | FALSE |
| Chchd4   | NCC | FALSE |
| Hsp90aa1 | NCC | FALSE |
| Nuf2     | NCC | FALSE |
| Mad2l1   | NCC | FALSE |
| Spdl1    | NCC | FALSE |
| Gfm1     | NCC | FALSE |
| Gar1     | NCC | TRUE  |
| Snhg4    | NCC | FALSE |
| Wbscr16  | NCC | FALSE |
| Larp4    | NCC | TRUE  |
| Skiv2l2  | NCC | FALSE |
| Rnf219   | NCC | FALSE |
| Bysl     | NCC | FALSE |
| Fam208b  | NCC | FALSE |
| Wdr46    | NCC | FALSE |
| Rbpms2   | NCC | FALSE |
| Kti12    | NCC | FALSE |
| Lck      | NCC | FALSE |
| Sephs2   | NCC | FALSE |
| Cachd1   | NCC | FALSE |
| Arrb1    | NCC | FALSE |
| Nop9     | NCC | FALSE |
| Adk      | NCC | FALSE |
| Gtse1    | NCC | FALSE |
| Prmt7    | NCC | FALSE |
| Lrpprc   | NCC | FALSE |
| Cenpn    | NCC | FALSE |
| Kif20b   | NCC | FALSE |
| Dnajc11  | NCC | FALSE |
| Kif4     | NCC | FALSE |
| Rad51ap1 | NCC | FALSE |
| Slc25a26 | NCC | FALSE |
| E2f7     | NCC | TRUE  |
| Sall3    | NCC | TRUE  |
| Gcat     | NCC | FALSE |
| Casc5    | NCC | FALSE |
| Pms1     | NCC | FALSE |
| Pcsk9    | NCC | FALSE |
| Cep85    | NCC | FALSE |
| Mcph1    | NCC | FALSE |
| Traip    | NCC | FALSE |
| Gars     | NCC | FALSE |
| Nup54    | NCC | FALSE |
| Orc2     | NCC | FALSE |
| Kpna3    | NCC | FALSE |
| Mpp6     | NCC | FALSE |

|          |     |       |
|----------|-----|-------|
| Hmmr     | NCC | FALSE |
| Galnt7   | NCC | FALSE |
| Nupl1    | NCC | FALSE |
| Spc25    | NCC | FALSE |
| Rars     | NCC | FALSE |
| E2f8     | NCC | TRUE  |
| Cdca2    | NCC | FALSE |
| Tomm40   | NCC | FALSE |
| Ybx1     | NCC | TRUE  |
| Rad18    | NCC | FALSE |
| Nol6     | NCC | FALSE |
| Rrp9     | NCC | FALSE |
| Urb2     | NCC | FALSE |
| Ska1     | NCC | FALSE |
| Ppan     | NCC | FALSE |
| Prdm12   | NCC | TRUE  |
| Ednra    | NCC | FALSE |
| Cstf2    | NCC | TRUE  |
| Mdc1     | NCC | FALSE |
| BC030867 | NCC | FALSE |
| Nle1     | NCC | FALSE |
| Celf1    | NCC | FALSE |
| Aspm     | NCC | FALSE |
| Elac2    | NCC | FALSE |
| Pwp2     | NCC | FALSE |
| Fkbp11   | NCC | FALSE |
| Polr1e   | NCC | FALSE |
| Tma16    | NCC | FALSE |
| Ruvbl2   | NCC | FALSE |
| Ttc27    | NCC | FALSE |
| Kpna2    | NCC | FALSE |
| BC027231 | NCC | FALSE |
| Hist1h1b | NCC | FALSE |
| Aatf     | NCC | FALSE |
| Usp25    | NCC | FALSE |
| Fam81a   | NCC | FALSE |
| Aars     | NCC | FALSE |
| Otud6b   | NCC | FALSE |
| Dhx29    | NCC | FALSE |
| Net1     | NCC | FALSE |
| Gal3st4  | NCC | FALSE |
| Ccne2    | NCC | FALSE |
| Zfp503   | NCC | TRUE  |
| Tnpo3    | NCC | FALSE |
| Ankrd27  | NCC | FALSE |
| Apitd1   | NCC | FALSE |
| Ddias    | NCC | FALSE |
| Mycn     | NCC | TRUE  |
| Ybx3     | NCC | FALSE |
| Enoph1   | NCC | FALSE |

|          |     |       |
|----------|-----|-------|
| Cul1     | NCC | FALSE |
| Nadk2    | NCC | FALSE |
| Exosc7   | NCC | FALSE |
| Dscc1    | NCC | FALSE |
| Naa25    | NCC | FALSE |
| Fastkd3  | NCC | FALSE |
| Gtpbp4   | NCC | FALSE |
| Imp4     | NCC | FALSE |
| Ppp1cb   | NCC | FALSE |
| Usp14    | NCC | FALSE |
| Fancd2   | NCC | FALSE |
| Ndc80    | NCC | FALSE |
| Sgol2    | NCC | FALSE |
| Otud4    | NCC | TRUE  |
| Dnaaf2   | NCC | FALSE |
| Srsf2    | NCC | FALSE |
| Zfp521   | NCC | TRUE  |
| Slc1a5   | NCC | FALSE |
| Las1l    | NCC | TRUE  |
| Bckdhb   | NCC | FALSE |
| Nifk     | NCC | FALSE |
| Troap    | NCC | FALSE |
| Kntc1    | NCC | FALSE |
| Gpatch4  | NCC | FALSE |
| Spata5   | NCC | FALSE |
| Pbk      | NCC | FALSE |
| Rbm19    | NCC | FALSE |
| Canx     | NCC | TRUE  |
| Gprc5c   | NCC | FALSE |
| Eif3d    | NCC | FALSE |
| Stil     | NCC | FALSE |
| Siah1b   | NCC | FALSE |
| Esco2    | NCC | FALSE |
| Clic4    | NCC | FALSE |
| Rai14    | NCC | FALSE |
| Srfbp1   | NCC | FALSE |
| Uba6     | NCC | FALSE |
| Slc45a3  | NCC | FALSE |
| Med18    | NCC | FALSE |
| Nudc     | NCC | FALSE |
| Ints5    | NCC | FALSE |
| Ppwd1    | NCC | FALSE |
| Zfp930   | NCC | TRUE  |
| Eif4ebp2 | NCC | FALSE |
| Cenpq    | NCC | FALSE |
| Cct2     | NCC | FALSE |
| Ctdp1    | NCC | FALSE |
| Tmem132c | NCC | FALSE |
| Arhgap19 | NCC | FALSE |
| Sall1    | NCC | TRUE  |

|            |     |       |
|------------|-----|-------|
| Nampt      | NCC | FALSE |
| Cmss1      | NCC | FALSE |
| Ckap2l     | NCC | FALSE |
| Mogs       | NCC | FALSE |
| Cenpi      | NCC | FALSE |
| Zmym1      | NCC | FALSE |
| Trmt6      | NCC | FALSE |
| Ahsa1      | NCC | FALSE |
| D16Erttd47 | NCC | FALSE |
| Ackr3      | NCC | FALSE |
| Eif4h      | NCC | FALSE |
| Dyrk3      | NCC | FALSE |
| Smc4       | NCC | FALSE |
| Prep       | NCC | FALSE |
| Nol8       | NCC | FALSE |
| Shmt2      | NCC | FALSE |
| Gins3      | NCC | FALSE |
| Gins1      | NCC | FALSE |
| Pnpt1      | NCC | FALSE |
| Cep55      | NCC | FALSE |
| Pask       | NCC | FALSE |
| Urb1       | NCC | FALSE |
| Cndp2      | NCC | FALSE |
| Plaa       | NCC | FALSE |
| Cars       | NCC | FALSE |
| Fam98a     | NCC | FALSE |
| Fam84b     | NCC | FALSE |
| Tube1      | NCC | FALSE |
| Tars2      | NCC | FALSE |
| Mak16      | NCC | FALSE |
| Mrto4      | NCC | FALSE |
| Orc1       | NCC | FALSE |
| Oip5       | NCC | FALSE |
| Xrcc6bp1   | NCC | FALSE |
| Rras2      | NCC | FALSE |
| Rmi2       | NCC | FALSE |
| Cenpw      | NCC | FALSE |
| Immt       | NCC | FALSE |
| Tiparp     | NCC | FALSE |
| Noc3l      | NCC | FALSE |
| Mogat2     | NCC | FALSE |
| Mat2a      | NCC | FALSE |
| Ltv1       | NCC | FALSE |
| Gbx2       | NCC | TRUE  |
| Cth        | NCC | FALSE |
| Ipmk       | NCC | FALSE |
| Krr1       | NCC | FALSE |
| Rpp40      | NCC | FALSE |
| Dbr1       | NCC | FALSE |
| Wdr55      | NCC | FALSE |

|           |     |       |
|-----------|-----|-------|
| Ddx10     | NCC | FALSE |
| Cs        | NCC | FALSE |
| Wnt1      | NCC | FALSE |
| L2hgdh    | NCC | FALSE |
| Arhgap11a | NCC | FALSE |
| Wars      | NCC | FALSE |
| Rad23b    | NCC | FALSE |
| Syce2     | NCC | FALSE |
| Gtpbp10   | NCC | FALSE |
| Axin2     | NCC | FALSE |
| Farsb     | NCC | FALSE |
| Ccnj      | NCC | FALSE |
| Nkd1      | NCC | FALSE |
| Cenpu     | NCC | FALSE |
| Abcb7     | NCC | FALSE |
| Polq      | NCC | FALSE |
| Rpusd2    | NCC | FALSE |
| Dhx37     | NCC | FALSE |
| Stag1     | NCC | FALSE |
| 1700052N1 | NCC | FALSE |
| Hnrnph1   | NCC | FALSE |
| Pus1      | NCC | FALSE |
| Gtf2e1    | NCC | FALSE |
| Trmt61a   | NCC | FALSE |
| 2810408I1 | NCC | FALSE |
| Cct7      | NCC | FALSE |
| Alg13     | NCC | FALSE |
| Abhd17c   | NCC | FALSE |
| Ror1      | NCC | FALSE |
| Eif2b3    | NCC | FALSE |
| Zfp280b   | NCC | TRUE  |
| Neurog2   | NCC | TRUE  |
| A630089N1 | NCC | FALSE |
| Nufip1    | NCC | FALSE |
| Shq1      | NCC | FALSE |
| Rps6ka3   | NCC | FALSE |
| Ptgis     | NCC | FALSE |
| Fpgs      | NCC | FALSE |
| Eri2      | NCC | FALSE |
| Cry1      | NCC | FALSE |
| Ece2      | NCC | FALSE |
| Vprbp     | NCC | FALSE |
| Dgcr8     | NCC | TRUE  |
| Pecr      | NCC | FALSE |
| Fam195a   | NCC | FALSE |
| L3mbtl2   | NCC | FALSE |
| Apod      | NCC | FALSE |
| Pde3b     | NCC | FALSE |
| Top3a     | NCC | FALSE |
| Rps6ka6   | NCC | FALSE |

|         |     |       |
|---------|-----|-------|
| Sass6   | NCC | FALSE |
| Gabpb1  | NCC | TRUE  |
| Tinf2   | NCC | FALSE |
| Asns    | NCC | FALSE |
| Ube2c   | NCC | FALSE |
| Clp1    | NCC | FALSE |
| Kif23   | NCC | FALSE |
| Arid3b  | NCC | TRUE  |
| Peo1    | NCC | FALSE |
| Mettl16 | NCC | FALSE |
| Gga2    | NCC | FALSE |
| Parl    | NCC | FALSE |
| Slc7a5  | NCC | FALSE |
| Senp2   | NCC | FALSE |
| Gsg2    | NCC | FALSE |
| Ppp1r7  | NCC | FALSE |
| Zranb3  | NCC | FALSE |
| Ccdc160 | NCC | FALSE |
| Psm14   | NCC | FALSE |
| Zgrf1   | NCC | FALSE |
| Usp15   | NCC | FALSE |
| Orc5    | NCC | FALSE |
| Hoxa1   | NCC | TRUE  |
| Thada   | NCC | FALSE |
| Slc16a3 | NCC | FALSE |
| Dhodh   | NCC | FALSE |
| Dut     | NCC | FALSE |
| Ccdc6   | NCC | FALSE |
| Nom1    | NCC | FALSE |
| Pak4    | NCC | FALSE |
| Shb     | NCC | FALSE |
| Gpn3    | NCC | FALSE |
| Mastl   | NCC | FALSE |
| Nars    | NCC | FALSE |
| Tango6  | NCC | FALSE |
| Acy1    | NCC | FALSE |
| Recql4  | NCC | FALSE |
| Nop14   | NCC | FALSE |
| Etaa1   | NCC | FALSE |
| Mrpl12  | NCC | FALSE |
| Prdm4   | NCC | TRUE  |
| Hoxaas3 | NCC | FALSE |
| Rpp38   | NCC | FALSE |
| Nadk    | NCC | FALSE |
| Cep135  | NCC | FALSE |
| Naf1    | NCC | FALSE |
| Rwdd4a  | NCC | FALSE |
| Trmt10c | NCC | FALSE |
| Aars2   | NCC | FALSE |
| Eogt    | NCC | FALSE |

|          |     |       |
|----------|-----|-------|
| Coil     | NCC | FALSE |
| Gfm2     | NCC | FALSE |
| Car14    | NCC | FALSE |
| Ppp2r5a  | NCC | FALSE |
| Aldoa    | NCC | FALSE |
| Nop16    | NCC | FALSE |
| Stard7   | NCC | FALSE |
| Nsun5    | NCC | FALSE |
| Lipt2    | NCC | FALSE |
| Nob1     | NCC | FALSE |
| 18100110 | NCC | FALSE |
| Usp1     | NCC | FALSE |
| Mdm1     | NCC | FALSE |
| Klhl12   | NCC | FALSE |
| Trmt5    | NCC | FALSE |
| Rnmt1    | NCC | FALSE |
| Ept1     | NCC | FALSE |
| Enkd1    | NCC | FALSE |
| Rnaseh1  | NCC | FALSE |
| Znrf3    | NCC | FALSE |
| Pcnt     | NCC | FALSE |
| Gfpt2    | NCC | FALSE |
| Mgme1    | NCC | FALSE |
| Znhit6   | NCC | FALSE |
| Trmt11   | NCC | FALSE |
| Fut10    | NCC | FALSE |
| Dusp5    | NCC | FALSE |
| Srpk1    | NCC | FALSE |
| Pcgf6    | NCC | FALSE |
| Baiap2l1 | NCC | FALSE |
| Clhc1    | NCC | FALSE |
| Mis12    | NCC | FALSE |
| Homez    | NCC | TRUE  |
| Trappc13 | NCC | FALSE |
| Cpne1    | NCC | FALSE |
| Acvr2b   | NCC | FALSE |
| Wdr90    | NCC | FALSE |
| Rpf2     | NCC | FALSE |
| Itpr1    | NCC | FALSE |
| Fkbp5    | NCC | FALSE |
| Ddx23    | NCC | FALSE |
| Aldh18a1 | NCC | FALSE |
| Racgap1  | NCC | FALSE |
| Cwf19l1  | NCC | FALSE |
| Qtrt1    | NCC | FALSE |
| Lrr1     | NCC | FALSE |
| Mrps18b  | NCC | FALSE |
| Usp24    | NCC | FALSE |
| Wdr73    | NCC | FALSE |
| Ddx31    | NCC | FALSE |

|           |     |       |
|-----------|-----|-------|
| Rtel1     | NCC | FALSE |
| BC052040  | NCC | FALSE |
| Sms       | NCC | FALSE |
| Desi1     | NCC | FALSE |
| Fanci     | NCC | FALSE |
| Sfrp5     | NCC | FALSE |
| Arhgap10  | NCC | FALSE |
| Bag2      | NCC | FALSE |
| Gmfb      | NCC | FALSE |
| Snora65   | NCC | FALSE |
| Atp11c    | NCC | FALSE |
| 9130401M  | NCC | FALSE |
| Nek6      | NCC | FALSE |
| Yars      | NCC | FALSE |
| Ptbp3     | NCC | FALSE |
| Dph5      | NCC | FALSE |
| Rabepk    | NCC | FALSE |
| Tufm      | NCC | FALSE |
| Usp8      | NCC | FALSE |
| G3bp2     | NCC | FALSE |
| Osgepl1   | NCC | FALSE |
| Ap1ar     | NCC | FALSE |
| Xpo6      | NCC | FALSE |
| Ubiad1    | NCC | FALSE |
| Palb2     | NCC | FALSE |
| Hic2      | NCC | TRUE  |
| Acaca     | NCC | FALSE |
| Edem1     | NCC | FALSE |
| Grsf1     | NCC | FALSE |
| Eif2b5    | NCC | FALSE |
| Fastkd5   | NCC | FALSE |
| Aimp2     | NCC | FALSE |
| Ccdc117   | NCC | FALSE |
| Ckap5     | NCC | FALSE |
| Nr2f2     | NCC | TRUE  |
| Dnaja3    | NCC | FALSE |
| Ubox5     | NCC | FALSE |
| Zfp423    | NCC | FALSE |
| Hist1h2ae | NCC | FALSE |
| Ppp5c     | NCC | TRUE  |
| Zdhhc3    | NCC | FALSE |
| Smtnl2    | NCC | FALSE |
| Wasf3     | NCC | FALSE |
| Xkr5      | NCC | FALSE |
| Xrcc2     | NCC | FALSE |
| Yae1d1    | NCC | FALSE |
| Zmynd19   | NCC | FALSE |
| 5730408K0 | NCC | FALSE |
| Ankle1    | NCC | FALSE |
| Tex30     | NCC | FALSE |



|          |     |       |
|----------|-----|-------|
| Wdr74    | NCC | FALSE |
| Dimt1    | NCC | FALSE |
| Mis18a   | NCC | FALSE |
| Tkt      | NCC | FALSE |
| Cipc     | NCC | FALSE |
| Rab23    | NCC | FALSE |
| Haus5    | NCC | FALSE |
| Pcid2    | NCC | FALSE |
| Dph1     | NCC | FALSE |
| Spryd4   | NCC | FALSE |
| Arl5b    | NCC | FALSE |
| Atp1b3   | NCC | FALSE |
| Med4     | NCC | FALSE |
| Haus2    | NCC | FALSE |
| Ras11a   | NCC | FALSE |
| Rad54b   | NCC | FALSE |
| Wdr4     | NCC | FALSE |
| Thg1l    | NCC | FALSE |
| Fem1b    | NCC | FALSE |
| Vamp3    | NCC | TRUE  |
| Mutyh    | NCC | FALSE |
| Pkmyt1   | NCC | FALSE |
| Twistnb  | NCC | FALSE |
| Brip1    | NCC | FALSE |
| Pus10    | NCC | FALSE |
| Bbx      | NCC | TRUE  |
| Ercc8    | NCC | FALSE |
| Mipep    | NCC | FALSE |
| Uhrf1bp1 | NCC | FALSE |
| Amot     | NCC | FALSE |
| Cit      | NCC | FALSE |
| Gstcd    | NCC | FALSE |
| Slc25a33 | NCC | FALSE |
| Msx3     | NCC | TRUE  |
| Emb      | NCC | FALSE |
| Rab34    | NCC | FALSE |
| Trib1    | NCC | FALSE |
| Nek4     | NCC | FALSE |
| Tbc1d31  | NCC | FALSE |
| Slc35e1  | NCC | FALSE |
| Hccs     | NCC | FALSE |
| Abi2     | NCC | FALSE |
| Uchl3    | NCC | FALSE |
| Pidd1    | NCC | FALSE |
| Fam53b   | NCC | FALSE |
| 2810408M | NCC | FALSE |
| Ccdc14   | NCC | FALSE |
| Dcbl2    | NCC | FALSE |
| Kif14    | NCC | FALSE |
| Tefm     | NCC | FALSE |

|           |     |       |
|-----------|-----|-------|
| Ppp4r1    | NCC | FALSE |
| Ccdc18    | NCC | FALSE |
| Tmem97    | NCC | FALSE |
| Gm17296   | NCC | FALSE |
| Nif3l1    | NCC | FALSE |
| Trub1     | NCC | FALSE |
| Mrpl19    | NCC | FALSE |
| Timm8a1   | NCC | TRUE  |
| Errfi1    | NCC | FALSE |
| Hs3st3b1  | NCC | FALSE |
| Cinp      | NCC | FALSE |
| Psm11     | NCC | FALSE |
| Slc6a6    | NCC | FALSE |
| Mecr      | NCC | FALSE |
| Pawr      | NCC | FALSE |
| Taf4b     | NCC | FALSE |
| Rnf168    | NCC | FALSE |
| Tut1      | NCC | FALSE |
| Lin54     | NCC | FALSE |
| Hist1h2ab | NCC | FALSE |
| Depdc1a   | NCC | FALSE |
| Hs6st2    | NCC | FALSE |
| Adat1     | NCC | FALSE |
| 4930427AC | NCC | FALSE |
| Heatr2    | NCC | FALSE |
| Nars2     | NCC | FALSE |
| Sfxn2     | NCC | FALSE |
| Gtf2a1    | NCC | TRUE  |
| Bivm      | NCC | FALSE |
| Hbb-bh1   | NCC | FALSE |
| Dtwd1     | NCC | FALSE |
| Fam175a   | NCC | FALSE |
| Mnd1      | NCC | FALSE |
| Hdgf      | NCC | FALSE |
| Smcr8     | NCC | FALSE |
| Mcc       | NCC | FALSE |
| Slc25a15  | NCC | FALSE |
| Sfmbt1    | NCC | FALSE |
| Boc       | NCC | FALSE |
| Nusap1    | NCC | FALSE |
| Prc1      | NCC | FALSE |
| Exosc1    | NCC | FALSE |
| Adck1     | NCC | FALSE |
| Rad1      | NCC | FALSE |
| Pja1      | NCC | FALSE |
| Llph      | NCC | FALSE |
| Srbd1     | NCC | TRUE  |
| Wnk3      | NCC | FALSE |
| Car11     | NCC | FALSE |
| Dgat2     | NCC | FALSE |

|          |     |       |
|----------|-----|-------|
| Slc30a5  | NCC | FALSE |
| Cldn1    | NCC | FALSE |
| Wrap53   | NCC | FALSE |
| Kbtbd8   | NCC | FALSE |
| Usp36    | NCC | FALSE |
| Ice2     | NCC | FALSE |
| Alms1    | NCC | FALSE |
| Hmha1    | NCC | FALSE |
| Rdh13    | NCC | FALSE |
| Rangrf   | NCC | FALSE |
| Wdr70    | NCC | FALSE |
| Grhpr    | NCC | TRUE  |
| Cxcr4    | NCC | FALSE |
| Ndufaf6  | NCC | FALSE |
| Lrrc58   | NCC | FALSE |
| Ddx25    | NCC | FALSE |
| Eif2b1   | NCC | FALSE |
| Pdxk     | NCC | FALSE |
| Zfp706   | NCC | TRUE  |
| Ush1c    | NCC | FALSE |
| Zfp703   | NCC | FALSE |
| Cyb5b    | NCC | FALSE |
| Fastkd1  | NCC | FALSE |
| Nfx1     | NCC | FALSE |
| Elp6     | NCC | FALSE |
| Rdh10    | NCC | FALSE |
| Ube2t    | NCC | FALSE |
| Mthfd2   | NCC | FALSE |
| Usp46    | NCC | FALSE |
| Myo19    | NCC | FALSE |
| Dclre1b  | NCC | FALSE |
| Lpcat1   | NCC | FALSE |
| Mettl5   | NCC | FALSE |
| Aff3     | NCC | FALSE |
| Piga     | NCC | FALSE |
| Stk39    | NCC | FALSE |
| Rap1gds1 | NCC | FALSE |
| Hoxa9    | NCC | TRUE  |
| 27000970 | NCC | FALSE |
| Chst2    | NCC | FALSE |
| Vac14    | NCC | FALSE |
| Zfp385a  | NCC | TRUE  |
| Tubb4b   | NCC | FALSE |
| Gclc     | NCC | FALSE |
| Hyou1    | NCC | FALSE |
| Zfp850   | NCC | TRUE  |
| Arxes1   | NCC | FALSE |
| Tmem183a | NCC | FALSE |
| Pdss1    | NCC | FALSE |
| Gli1     | NCC | TRUE  |

|          |     |       |
|----------|-----|-------|
| Crif3    | NCC | FALSE |
| Alpl     | NCC | FALSE |
| Toe1     | NCC | FALSE |
| Pdss2    | NCC | FALSE |
| Ebna1bp2 | NCC | FALSE |
| Bard1    | NCC | FALSE |
| Tbccd1   | NCC | FALSE |
| Homer1   | NCC | FALSE |
| 1810043G | NCC | FALSE |
| Cep83    | NCC | FALSE |
| Kctd15   | NCC | FALSE |
| Edrf1    | NCC | FALSE |
| Fam83d   | NCC | FALSE |
| Oaf      | NCC | FALSE |
| Zbtb11   | NCC | TRUE  |
| Rbm6     | NCC | FALSE |
| Mtrr     | NCC | FALSE |
| Cbll1    | NCC | FALSE |
| Rev1     | NCC | FALSE |
| Snhg12   | NCC | FALSE |
| Tspan4   | NCC | FALSE |
| Nubpl    | NCC | FALSE |
| Zfp451   | NCC | TRUE  |
| Nubp1    | NCC | FALSE |
| Polr3b   | NCC | FALSE |
| Usp38    | NCC | FALSE |
| Ada      | NCC | FALSE |
| Larp1    | NCC | TRUE  |
| Kif18a   | NCC | FALSE |
| 5830418K | NCC | FALSE |
| Ttc30a1  | NCC | FALSE |
| Gen1     | NCC | FALSE |
| Mllt3    | NCC | FALSE |
| Fam20b   | NCC | FALSE |
| Ak6      | NCC | TRUE  |
| Nupl2    | NCC | FALSE |
| Utp23    | NCC | FALSE |
| Tmem194  | NCC | FALSE |
| Naa10    | NCC | FALSE |
| Rpl34    | NCC | FALSE |
| Aldh9a1  | NCC | FALSE |
| Hoxb6    | NCC | TRUE  |
| Timm50   | NCC | FALSE |
| Fam203a  | NCC | FALSE |
| Pafah1b2 | NCC | FALSE |
| Smc3     | NCC | TRUE  |
| Ubtf     | NCC | TRUE  |
| Fasn     | NCC | FALSE |
| Snhg5    | NCC | FALSE |
| Rbbp5    | NCC | TRUE  |

|           |     |       |
|-----------|-----|-------|
| 1190002N1 | NCC | FALSE |
| Mtmr4     | NCC | FALSE |
| Iqgap3    | NCC | FALSE |
| Hira      | NCC | FALSE |
| Col1a2    | NCC | FALSE |
| Zdhhc13   | NCC | FALSE |
| Pitpnb    | NCC | FALSE |
| Bcl2l11   | NCC | FALSE |
| Lactb2    | NCC | FALSE |
| Eno1b.1   | NCC | FALSE |
| Focad     | NCC | FALSE |
| Psmc5     | NCC | FALSE |
| Zswim7    | NCC | FALSE |
| Snip1     | NCC | FALSE |
| Zpr1      | NCC | FALSE |
| Cpt2      | NCC | FALSE |
| Timm10    | NCC | FALSE |
| Ppa2      | NCC | FALSE |
| G2e3      | NCC | FALSE |
| Depdc1b   | NCC | FALSE |
| 1110008L1 | NCC | FALSE |
| 9930014A1 | NCC | FALSE |
| Thap4     | NCC | FALSE |
| Nfe2l2    | NCC | TRUE  |
| Yy2       | NCC | TRUE  |
| Unc119b   | NCC | FALSE |
| Mmachc    | NCC | FALSE |
| Nfs1      | NCC | FALSE |
| Tmem245   | NCC | FALSE |
| Tspan9    | NCC | FALSE |
| Wdr48     | NCC | FALSE |
| Zfp442    | NCC | TRUE  |
| Traf6     | NCC | FALSE |
| Gnl2      | NCC | FALSE |
| Taf1b     | NCC | FALSE |
| Gm13157   | NCC | FALSE |
| Map3k4    | NCC | FALSE |
| Arv1      | NCC | FALSE |
| Ube2k     | NCC | TRUE  |
| Tmem37    | NCC | FALSE |
| Got1      | NCC | TRUE  |
| Gnb1l     | NCC | FALSE |
| Dym       | NCC | FALSE |
| Ccrn4l    | NCC | FALSE |
| Ankrd32   | NCC | FALSE |
| Ddx28     | NCC | FALSE |
| Ddx19b    | NCC | FALSE |
| Gtpbp8    | NCC | FALSE |
| Ints10    | NCC | FALSE |
| Glmn      | NCC | FALSE |

|           |     |       |
|-----------|-----|-------|
| Fam107b   | NCC | FALSE |
| Smug1     | NCC | TRUE  |
| Xrcc3     | NCC | FALSE |
| Dcc       | NCC | FALSE |
| Gtf2f2    | NCC | FALSE |
| Arxes2    | NCC | FALSE |
| Thoc5     | NCC | FALSE |
| Cops7a    | NCC | FALSE |
| Lrrc47    | NCC | FALSE |
| Slit1     | NCC | FALSE |
| Get4      | NCC | FALSE |
| 9230110C1 | NCC | FALSE |
| Egfl7     | NCC | FALSE |
| Snord52   | NCC | FALSE |
| Trim37    | NCC | FALSE |
| Cblb      | NCC | FALSE |
| Dusp9     | NCC | FALSE |
| Mettl4    | NCC | FALSE |
| Recql     | NCC | FALSE |
| Coa7      | NCC | FALSE |
| Fem1c     | NCC | FALSE |
| Tarbp2    | NCC | FALSE |
| Zfp280d   | NCC | TRUE  |
| Faf1      | NCC | FALSE |
| Txnrd3    | NCC | FALSE |
| Lsm3      | NCC | FALSE |
| Dbp       | NCC | TRUE  |
| Apex2     | NCC | TRUE  |
| Rngtt     | NCC | FALSE |
| Cenpj     | NCC | FALSE |
| Papd5     | NCC | FALSE |
| Tonsl     | NCC | FALSE |
| Ogfod1    | NCC | FALSE |
| Rabl2     | NCC | FALSE |
| Pou2f1    | NCC | TRUE  |
| Rmdn3     | NCC | FALSE |
| Cenpl     | NCC | FALSE |
| Hspa5     | NCC | TRUE  |
| Vrk2      | NCC | FALSE |
| Prom1     | NCC | FALSE |
| Bid       | NCC | FALSE |
| Coq3      | NCC | FALSE |
| Nup210    | NCC | FALSE |
| Bcs1l     | NCC | FALSE |
| Pctp      | NCC | FALSE |
| Hmgxb3    | NCC | FALSE |
| Ercc2     | NCC | FALSE |
| Epb4.1    | NCC | FALSE |
| Abl2      | NCC | FALSE |
| Flywch1   | NCC | FALSE |

|            |     |       |
|------------|-----|-------|
| Txnrd2     | NCC | FALSE |
| Actr3      | NCC | FALSE |
| Ddx24      | NCC | FALSE |
| Atp5b      | NCC | FALSE |
| Helq       | NCC | FALSE |
| Hnrnpa1    | NCC | FALSE |
| Sirt1      | NCC | FALSE |
| Ube2i      | NCC | FALSE |
| Got2       | NCC | FALSE |
| Ercc6l2    | NCC | FALSE |
| Diexf      | NCC | FALSE |
| Cox10      | NCC | FALSE |
| Hspbap1    | NCC | FALSE |
| Osgin2     | NCC | FALSE |
| Steap1     | NCC | FALSE |
| Sdhaf2     | NCC | FALSE |
| L3mbtl3    | NCC | FALSE |
| Rad9a      | NCC | FALSE |
| Cox15      | NCC | FALSE |
| Larp4b     | NCC | FALSE |
| Tti2       | NCC | FALSE |
| Det1       | NCC | FALSE |
| Zfp239     | NCC | TRUE  |
| Dlat       | NCC | FALSE |
| Rexo2      | NCC | FALSE |
| Cep72      | NCC | FALSE |
| Zfp131     | NCC | TRUE  |
| Dtnb       | NCC | FALSE |
| Anpep      | NCC | FALSE |
| Xab2       | NCC | FALSE |
| Zfp143     | NCC | TRUE  |
| Ptcd2      | NCC | FALSE |
| Tyw3       | NCC | FALSE |
| Mrrf       | NCC | FALSE |
| Smarca5-p: | NCC | FALSE |
| Gnl1       | NCC | FALSE |
| Zbtb16     | NCC | TRUE  |
| Setx       | NCC | FALSE |
| Tra2a      | NCC | FALSE |
| Ilf2       | NCC | TRUE  |
| Med9       | NCC | FALSE |
| Top1mt     | NCC | FALSE |
| 2610305D1  | NCC | FALSE |
| Rpl5       | NCC | FALSE |
| Dtd1       | NCC | FALSE |
| 2700062C   | NCC | FALSE |
| Kat7       | NCC | FALSE |
| Atp2a2     | NCC | FALSE |
| Pdk1       | NCC | FALSE |
| Coq5       | NCC | FALSE |

|           |     |       |
|-----------|-----|-------|
| Foxp2     | NCC | TRUE  |
| Alkbh8    | NCC | FALSE |
| Llgl2     | NCC | FALSE |
| Polr2f    | NCC | FALSE |
| Sypl      | NCC | FALSE |
| Ly75      | NCC | FALSE |
| Alg3      | NCC | FALSE |
| Med26     | NCC | FALSE |
| Pet112    | NCC | FALSE |
| Rad51c    | NCC | FALSE |
| Rrn3      | NCC | FALSE |
| Capn15    | NCC | FALSE |
| Secisbp2  | NCC | FALSE |
| Kdm2b     | NCC | TRUE  |
| 2700099C1 | NCC | FALSE |
| Setdb2    | NCC | FALSE |
| Fam207a   | NCC | FALSE |
| Gne       | NCC | FALSE |
| 2310022BC | NCC | FALSE |
| Farsa     | NCC | FALSE |
| Slc35d1   | NCC | FALSE |
| Parpbp    | NCC | FALSE |
| Dph2      | NCC | FALSE |
| Zfp668    | NCC | TRUE  |
| Rpusd3    | NCC | FALSE |
| Stk38l    | NCC | FALSE |
| Hprt      | NCC | FALSE |
| Abcb6     | NCC | FALSE |
| Akap1     | NCC | FALSE |
| Aar2      | NCC | FALSE |
| Ece1      | NCC | FALSE |
| Ccdc90b   | NCC | FALSE |
| Cenpo     | NCC | FALSE |
| Trmt2a    | NCC | FALSE |
| Fam188b   | NCC | FALSE |
| Rnf34     | NCC | FALSE |
| Figl12    | NCC | FALSE |
| Usp42     | NCC | FALSE |
| Txn14a    | NCC | FALSE |
| Acs13     | NCC | FALSE |
| Ptch1     | NCC | FALSE |
| Dhx34     | NCC | FALSE |
| Dlst      | NCC | FALSE |
| Zbtb9     | NCC | FALSE |
| 2700046AC | NCC | FALSE |
| Csn3      | NCC | FALSE |
| Col4a5    | NCC | FALSE |
| Psmc1     | NCC | FALSE |
| Abcf1     | NCC | FALSE |
| Telo2     | NCC | FALSE |



|           |     |       |
|-----------|-----|-------|
| Jade3     | NCC | FALSE |
| Nup88     | NCC | FALSE |
| Nagpa     | NCC | FALSE |
| Timm9     | NCC | FALSE |
| Gnpnat1   | NCC | FALSE |
| Morc3     | NCC | FALSE |
| Dnajc21   | NCC | TRUE  |
| Hist1h1d  | NCC | FALSE |
| Ttc37     | NCC | FALSE |
| Efnb1     | NCC | FALSE |
| Afg3l2    | NCC | FALSE |
| Fbxo42    | NCC | FALSE |
| Fktn      | NCC | FALSE |
| Crybg3    | NCC | FALSE |
| Zfp646    | NCC | TRUE  |
| Tenm4     | NCC | FALSE |
| Stk35     | NCC | FALSE |
| Stt3b     | NCC | FALSE |
| 1600002HC | NCC | FALSE |
| Tfap2c    | NCC | TRUE  |
| Etnk1     | NCC | FALSE |
| Cldn12    | NCC | FALSE |
| Csrnp3    | NCC | FALSE |
| Polh      | NCC | FALSE |
| Pde7a     | NCC | FALSE |
| Ddi2      | NCC | FALSE |
| Znhit3    | NCC | FALSE |
| Hace1     | NCC | FALSE |
| Taf5      | NCC | FALSE |
| Simc1     | NCC | FALSE |
| Setd6     | NCC | FALSE |
| Pdcd7     | NCC | FALSE |
| Has2      | NCC | FALSE |
| Tmem209   | NCC | FALSE |
| N4bp3     | NCC | FALSE |
| Slc11a2   | NCC | FALSE |
| Akip1     | NCC | FALSE |
| Slc35a3   | NCC | FALSE |
| Hist1h4d  | NCC | FALSE |
| Def8      | NCC | FALSE |
| Cdkal1    | NCC | FALSE |
| Snord22   | NCC | FALSE |
| Slc38a4   | NCC | FALSE |
| Ippk      | NCC | FALSE |
| Kpna6     | NCC | FALSE |
| Tbp       | NCC | TRUE  |
| Pars2     | NCC | FALSE |
| Ccbl2     | NCC | FALSE |
| Rpl24     | NCC | FALSE |
| Txlng     | NCC | FALSE |

|           |     |       |
|-----------|-----|-------|
| Ubxn2b    | NCC | FALSE |
| Ero1l     | NCC | FALSE |
| Snapc4    | NCC | TRUE  |
| Brpf1     | NCC | FALSE |
| Cdk5rap1  | NCC | FALSE |
| Btbd19    | NCC | FALSE |
| Kif24     | NCC | FALSE |
| Opn3      | NCC | FALSE |
| Nudt19    | NCC | FALSE |
| Fam169a   | NCC | FALSE |
| Thap11    | NCC | TRUE  |
| Sh2b2     | NCC | FALSE |
| Supt3     | NCC | FALSE |
| Lect1     | NCC | FALSE |
| Prosc     | NCC | FALSE |
| Ccnt1     | NCC | FALSE |
| Ube2n     | NCC | FALSE |
| Snord47   | NCC | FALSE |
| Traf2     | NCC | FALSE |
| Slc35c1   | NCC | FALSE |
| Atp5sl    | NCC | FALSE |
| 1110004E0 | NCC | FALSE |
| Pcdh8     | NCC | FALSE |
| Mdm4      | NCC | FALSE |
| Mpped1    | NCC | FALSE |
| Sf3a2     | NCC | FALSE |
| Trpc4ap   | NCC | FALSE |
| Pgm2      | NCC | FALSE |
| Fam101a   | NCC | FALSE |
| Rragd     | NCC | FALSE |
| Eral1     | NCC | FALSE |
| Zcchc4    | NCC | FALSE |
| Snrnp25   | NCC | FALSE |
| Letm1     | NCC | FALSE |
| Uqcc1     | NCC | FALSE |
| Nomo1     | NCC | FALSE |
| Sssca1    | NCC | FALSE |
| Gpr89     | NCC | FALSE |
| Xrn2      | NCC | FALSE |
| Lancl2    | NCC | FALSE |
| Wdr89     | NCC | FALSE |
| Pif1      | NCC | FALSE |
| Senp8     | NCC | FALSE |
| Ecsit     | NCC | TRUE  |
| Ccdc163   | NCC | FALSE |
| Mgmt      | NCC | FALSE |
| Mib1      | NCC | FALSE |
| Ube2v2    | NCC | FALSE |
| Actr6     | NCC | FALSE |
| Usp54     | NCC | FALSE |

|         |     |       |
|---------|-----|-------|
| Riok1   | NCC | FALSE |
| Polrmt  | NCC | FALSE |
| Rmi1    | NCC | FALSE |
| Snora64 | NCC | FALSE |
| Angel1  | NCC | FALSE |
| Hiat1   | NCC | FALSE |
| Trim6   | NCC | FALSE |
| Khdrbs1 | NCC | FALSE |
| Zfp869  | NCC | TRUE  |
| Pcx     | NCC | FALSE |
| Mmgt1   | NCC | FALSE |
| Slx4    | NCC | FALSE |
| Cnksr3  | NCC | FALSE |
| Gpbp1   | NCC | FALSE |
| Casp9   | NCC | FALSE |
| Sestd1  | NCC | FALSE |
| Draxin  | NCC | FALSE |
| Snx8    | NCC | FALSE |
| Fam72a  | NCC | FALSE |
| Tmem110 | NCC | FALSE |
| Slc46a1 | NCC | FALSE |
| Mtpn    | NCC | FALSE |
| Zfp12   | NCC | TRUE  |
| Fbl     | NCC | FALSE |
| Gtf3c5  | NCC | TRUE  |
| Pnpo    | NCC | FALSE |
| Mrps31  | NCC | FALSE |
| Ptn     | NCC | FALSE |
| Csnk2a2 | NCC | FALSE |
| Sigmar1 | NCC | FALSE |
| Hoxc4   | NCC | TRUE  |
| Nln     | NCC | FALSE |
| Rpap2   | NCC | FALSE |
| Zfp566  | NCC | TRUE  |
| Pcyt1a  | NCC | FALSE |
| Rpn2    | NCC | FALSE |
| Pacrgl  | NCC | FALSE |
| Tbl2    | NCC | FALSE |
| Caprin2 | NCC | FALSE |
| Lrrc14  | NCC | FALSE |
| Eml3    | NCC | FALSE |
| Fscn1   | NCC | FALSE |
| Far1    | NCC | FALSE |
| Srrm1   | NCC | FALSE |
| Alkbh4  | NCC | FALSE |
| Nkx1-2  | NCC | TRUE  |
| Zfp251  | NCC | TRUE  |
| Nup35   | NCC | FALSE |
| Kank1   | NCC | FALSE |
| Pdcd2   | NCC | FALSE |

|           |     |       |
|-----------|-----|-------|
| Phf3      | NCC | FALSE |
| 1110057K0 | NCC | FALSE |
| Zfp407    | NCC | TRUE  |
| Mettl8    | NCC | FALSE |
| Mob1b     | NCC | FALSE |
| Eftud1    | NCC | FALSE |
| Agk       | NCC | FALSE |
| Cdpf1     | NCC | FALSE |
| Zbtb43    | NCC | TRUE  |
| Neil3     | NCC | FALSE |
| Psmb7     | NCC | FALSE |
| Emc6      | NCC | FALSE |
| Zfp7      | NCC | FALSE |
| Trdmt1    | NCC | FALSE |
| Rassf2    | NCC | FALSE |
| Bloc1s4   | NCC | FALSE |
| Fzd10     | NCC | FALSE |
| Rtn4ip1   | NCC | FALSE |
| AK010878  | NCC | FALSE |
| Exoc5     | NCC | FALSE |
| Reps1     | NCC | FALSE |
| Glud1     | NCC | FALSE |
| Hoxc10    | NCC | TRUE  |
| Ythdc2    | NCC | FALSE |
| Vps36     | NCC | FALSE |
| Fmr1      | NCC | FALSE |
| Diap3     | NCC | FALSE |
| Crb2      | NCC | FALSE |
| Zbtb48    | NCC | TRUE  |
| Foxk2     | NCC | TRUE  |
| Slc25a30  | NCC | FALSE |
| Hist1h1e  | NCC | FALSE |
| Gapvd1    | NCC | FALSE |
| Fxn       | NCC | FALSE |
| Pla2g12a  | NCC | FALSE |
| Ubqln1    | NCC | FALSE |
| Akr1c13   | NCC | FALSE |
| Cbwd1     | NCC | FALSE |
| Pdhx      | NCC | FALSE |
| Suox      | NCC | FALSE |
| Irx3      | NCC | TRUE  |
| Cep89     | NCC | FALSE |
| Ssx2ip    | NCC | FALSE |
| Spice1    | NCC | FALSE |
| Zfp367    | NCC | TRUE  |
| Sp2       | NCC | TRUE  |
| Bcorl1    | NCC | FALSE |
| Dhps      | NCC | FALSE |
| Gm9833    | NCC | TRUE  |
| 2310057M  | NCC | FALSE |

|            |     |       |
|------------|-----|-------|
| Zfp142     | NCC | FALSE |
| Strbp      | NCC | FALSE |
| C130026L2  | NCC | FALSE |
| Slc25a38   | NCC | FALSE |
| Batf3      | NCC | TRUE  |
| Nkain1     | NCC | FALSE |
| Pithd1     | NCC | FALSE |
| Tmem186    | NCC | FALSE |
| Odf2l      | NCC | FALSE |
| Relt       | NCC | FALSE |
| Gmcs       | NCC | FALSE |
| Plagl1     | NCC | TRUE  |
| Tasp1      | NCC | FALSE |
| Nedd1      | NCC | FALSE |
| Cdkn2aipnl | NCC | FALSE |
| Usp44      | NCC | FALSE |
| Pfkfb3     | NCC | FALSE |
| Taf1a      | NCC | TRUE  |
| Gmeb2      | NCC | TRUE  |
| Pcbp4      | NCC | FALSE |
| Jrk        | NCC | FALSE |
| Cep57l1    | NCC | FALSE |
| Rbm8a      | NCC | FALSE |
| Dnajc27    | NCC | FALSE |
| Sacm1l     | NCC | FALSE |
| Mfsd7b     | NCC | FALSE |
| Exoc1      | NCC | FALSE |
| Pnp        | NCC | FALSE |
| Mira       | NCC | FALSE |
| Rhpn1      | NCC | FALSE |
| Mphosph8   | NCC | FALSE |
| Sap18      | NCC | FALSE |
| Surf6      | NCC | FALSE |
| Mettl21a   | NCC | FALSE |
| Pwwp2a     | NCC | FALSE |
| Vash2      | NCC | FALSE |
| C330006A1  | NCC | FALSE |
| Fgfbp3     | NCC | FALSE |
| Tnfaip8    | NCC | FALSE |
| Prmt10     | NCC | FALSE |
| Comtd1     | NCC | FALSE |
| Tpd52l1    | NCC | FALSE |
| Ing2       | NCC | FALSE |
| Zfp932     | NCC | TRUE  |
| Eif5a2     | NCC | TRUE  |
| Pepd       | NCC | FALSE |
| Ndufaf5    | NCC | FALSE |
| Ermp1      | NCC | FALSE |
| Fgfr4      | NCC | FALSE |
| Polr3a     | NCC | TRUE  |

|            |     |       |
|------------|-----|-------|
| Exog       | NCC | FALSE |
| Chka       | NCC | FALSE |
| Tusc2      | NCC | FALSE |
| Rptor      | NCC | FALSE |
| Trmt12     | NCC | FALSE |
| 943003810: | NCC | FALSE |
| Nt5dc1     | NCC | FALSE |
| Pex5       | NCC | FALSE |
| Sh3d19     | NCC | FALSE |
| Phf7       | NCC | FALSE |
| Ubqln2     | NCC | FALSE |
| Dab2       | NCC | TRUE  |
| Psmc2      | NCC | TRUE  |
| Txn2       | NCC | FALSE |
| Zfyve20    | NCC | FALSE |
| Cited2     | NCC | FALSE |
| Tnks       | NCC | FALSE |
| Rasl11b    | NCC | FALSE |
| Atp2b1     | NCC | FALSE |
| Eif6       | NCC | FALSE |
| Ror2       | NCC | FALSE |
| Ddx49      | NCC | FALSE |
| Tnfrsf22   | NCC | FALSE |
| Rc3h1      | NCC | FALSE |
| Cops8      | NCC | FALSE |
| Ghitm      | NCC | FALSE |
| Zfp777     | NCC | TRUE  |
| Ybey       | NCC | FALSE |
| Slc5a3     | NCC | FALSE |
| Hoxc5      | NCC | TRUE  |
| Zfp937     | NCC | TRUE  |
| Rpl21      | NCC | FALSE |
| Clybl      | NCC | FALSE |
| Ntpcr      | NCC | FALSE |
| Zc3h8      | NCC | FALSE |
| Cep152     | NCC | FALSE |
| Rnf165     | NCC | FALSE |
| Coprs      | NCC | FALSE |
| Mum111     | NCC | FALSE |
| Wdr24      | NCC | FALSE |
| Cercam     | NCC | FALSE |
| Rbmx2      | NCC | FALSE |
| Ccdc101    | NCC | FALSE |
| Ptchd2     | NCC | FALSE |
| Rps12      | NCC | FALSE |
| Spryd7     | NCC | FALSE |
| Cenpc1     | NCC | FALSE |
| Meis3      | NCC | TRUE  |
| Cep97      | NCC | FALSE |
| Fbxl18     | NCC | FALSE |

|          |     |       |
|----------|-----|-------|
| Slc4a1ap | NCC | FALSE |
| Opa3     | NCC | FALSE |
| Grpel2   | NCC | FALSE |
| Heph     | NCC | FALSE |
| Tlcd1    | NCC | FALSE |
| Usp5     | NCC | FALSE |
| Ube3c    | NCC | FALSE |
| Tmem69   | NCC | FALSE |
| Abhd17b  | NCC | FALSE |
| Zkscan5  | NCC | TRUE  |
| Snora70  | NCC | FALSE |
| Ccdc134  | NCC | FALSE |
| Pycr1    | NCC | FALSE |
| Dffb     | NCC | FALSE |
| Fam101b  | NCC | FALSE |
| Cog2     | NCC | FALSE |
| Dhcr24   | NCC | FALSE |
| Tmem39b  | NCC | FALSE |
| Brms1    | NCC | FALSE |
| Glul     | NCC | FALSE |
| 5031439G | NCC | FALSE |
| Ctnnb1   | NCC | FALSE |
| D230025D | NCC | FALSE |
| Ap4b1    | NCC | FALSE |
| Hoxd10   | NCC | TRUE  |
| Ttpa     | NCC | FALSE |
| Papolg   | NCC | FALSE |
| Dlc1     | NCC | FALSE |
| Eef1e1   | NCC | FALSE |
| Gss      | NCC | FALSE |
| Ivd      | NCC | TRUE  |
| Sgpp2    | NCC | FALSE |
| Grb7     | NCC | FALSE |
| Impdh1   | NCC | FALSE |
| Arhgef39 | NCC | FALSE |
| Kdm8     | NCC | FALSE |
| Cmtr2    | NCC | FALSE |
| BC064078 | NCC | FALSE |
| Gopc     | NCC | FALSE |
| Klhl25   | NCC | FALSE |
| Pcsk5    | NCC | FALSE |
| Ap1g2    | NCC | FALSE |
| Phykpl   | NCC | FALSE |
| Ptar1    | NCC | FALSE |
| Ubxn7    | NCC | FALSE |
| Zbtb5    | NCC | TRUE  |
| Ccdc40   | NCC | FALSE |
| Ammecr1  | NCC | FALSE |
| Zfp386   | NCC | TRUE  |
| Eif3g    | NCC | FALSE |

|           |     |       |
|-----------|-----|-------|
| Vps35     | NCC | FALSE |
| Rhbdd3    | NCC | FALSE |
| Ttll5     | NCC | FALSE |
| 6720489N1 | NCC | TRUE  |
| Asb13     | NCC | FALSE |
| Eno1      | NCC | FALSE |
| Vti1a     | NCC | FALSE |
| Taf4a     | NCC | FALSE |
| Alx1      | NCC | TRUE  |
| Mga       | NCC | TRUE  |
| Cdhr2     | NCC | FALSE |
| Tsnax     | NCC | TRUE  |
| Usp48     | NCC | FALSE |
| Prokr1    | NCC | FALSE |
| Tagap1    | NCC | FALSE |
| Sucla2    | NCC | FALSE |
| Gcfc2     | NCC | FALSE |
| Cars2     | NCC | FALSE |
| Adarb1    | NCC | TRUE  |
| Zfp770    | NCC | TRUE  |
| Ap4s1     | NCC | FALSE |
| Pdlim5    | NCC | TRUE  |
| Mrpl40    | NCC | FALSE |
| Mrpl47    | NCC | FALSE |
| Hmox1     | NCC | FALSE |
| Atp2c1    | NCC | FALSE |
| Pot1a     | NCC | FALSE |
| Plcl2     | NCC | FALSE |
| Jmjd6     | NCC | FALSE |
| Fgfr1     | NCC | FALSE |
| Sh3bp4    | NCC | FALSE |
| Zbtb25    | NCC | TRUE  |
| Cops3     | NCC | FALSE |
| Gga3      | NCC | FALSE |
| Ift88     | NCC | FALSE |
| Gm10857   | NCC | FALSE |
| Exoc2     | NCC | FALSE |
| Wdyhv1    | NCC | FALSE |
| N6amt1    | NCC | FALSE |
| Matn3     | NCC | FALSE |
| Rpl26     | NCC | FALSE |
| Wdr53     | NCC | FALSE |
| Mbtps2    | NCC | TRUE  |
| Ctu1      | NCC | FALSE |
| Mir1949   | NCC | FALSE |
| Adamts20  | NCC | FALSE |
| Taf3      | NCC | FALSE |
| Zfp346    | NCC | FALSE |
| Zfp13     | NCC | TRUE  |
| Smim3     | NCC | FALSE |



|            |     |       |
|------------|-----|-------|
| Zswim1     | NCC | TRUE  |
| Cebpg      | NCC | TRUE  |
| Snora7a    | NCC | FALSE |
| Fancc      | NCC | FALSE |
| Abhd5      | NCC | FALSE |
| D3Erttd751 | NCC | FALSE |
| Pgrmc2     | NCC | FALSE |
| Yrdc       | NCC | FALSE |
| Gas8       | NCC | FALSE |
| Endog      | NCC | FALSE |
| Spred2     | NCC | FALSE |
| Kin        | NCC | FALSE |
| Diap1      | NCC | FALSE |
| Cpne5      | NCC | FALSE |
| Gng12      | NCC | FALSE |
| Tomm22     | NCC | FALSE |
| Uimc1      | NCC | FALSE |
| Tesk2      | NCC | FALSE |
| Mrpl46     | NCC | FALSE |
| Tprkb      | NCC | FALSE |
| Aldh4a1    | NCC | FALSE |
| Tctex1d2   | NCC | FALSE |
| Hinfp      | NCC | TRUE  |
| Tbkbp1     | NCC | FALSE |
| Zbtb44     | NCC | TRUE  |
| Rrp7a      | NCC | FALSE |
| 1110002L0  | NCC | FALSE |
| Mtmr9      | NCC | FALSE |
| Nudt2      | NCC | FALSE |
| Zfp64      | NCC | TRUE  |
| Myo1e      | NCC | FALSE |
| Cep128     | NCC | FALSE |
| Ap5m1      | NCC | FALSE |
| Cep63      | NCC | FALSE |
| Cdc42se2   | NCC | FALSE |
| Cmtm4      | NCC | FALSE |
| Nphp1      | NCC | FALSE |
| Ccdc93     | NCC | FALSE |
| Gspt2      | NCC | FALSE |
| Tmem11     | NCC | FALSE |
| Kbtbd7     | NCC | FALSE |
| Khyn       | NCC | FALSE |
| Zmpste24   | NCC | FALSE |
| Iqcc       | NCC | FALSE |
| Zfp689     | NCC | TRUE  |
| Mnd1-ps    | NCC | FALSE |
| Zak        | NCC | FALSE |
| Psm6       | NCC | FALSE |
| Polg2      | NCC | FALSE |
| Ftsj2      | NCC | FALSE |

|           |     |       |
|-----------|-----|-------|
| Pmm2      | NCC | FALSE |
| Brd8      | NCC | FALSE |
| Hoxc6     | NCC | TRUE  |
| Ptprk     | NCC | FALSE |
| Psm3      | NCC | FALSE |
| Fam69a    | NCC | FALSE |
| Med22     | NCC | FALSE |
| Mrpl38    | NCC | FALSE |
| Rpusd1    | NCC | FALSE |
| R3hcc1    | NCC | FALSE |
| Avpi1     | NCC | FALSE |
| Hoxa10    | NCC | TRUE  |
| Xpnpep3   | NCC | FALSE |
| Lmx1a     | NCC | TRUE  |
| Ino80     | NCC | FALSE |
| Amz2      | NCC | FALSE |
| Ppp4r4    | NCC | FALSE |
| Wdr62     | NCC | FALSE |
| Pdcd6ip   | NCC | FALSE |
| Pex10     | NCC | FALSE |
| Nfkbib    | NCC | FALSE |
| Rif       | NCC | TRUE  |
| Zfp84     | NCC | FALSE |
| Mrps5     | NCC | FALSE |
| Aste1     | NCC | FALSE |
| Mto1      | NCC | FALSE |
| Brwd3     | NCC | FALSE |
| Taf15     | NCC | FALSE |
| LOC101056 | NCC | FALSE |
| Zfp830    | NCC | TRUE  |
| Sowahc    | NCC | FALSE |
| Six4      | NCC | TRUE  |
| Mstn      | NCC | FALSE |
| Vcpip1    | NCC | FALSE |
| Lin9      | NCC | FALSE |
| Rpl10     | NCC | FALSE |
| S100pbp   | NCC | FALSE |
| D030056L2 | NCC | FALSE |
| Lsm11     | NCC | FALSE |
| Cluap1    | NCC | FALSE |
| Ddx59     | NCC | FALSE |
| Tssc1     | NCC | FALSE |
| Ptges2    | NCC | FALSE |
| Alg9      | NCC | FALSE |
| Gmppb     | NCC | FALSE |
| Hibch     | NCC | FALSE |
| Stx18     | NCC | FALSE |
| 573045P1  | NCC | FALSE |
| Wars2     | NCC | FALSE |
| Nkrf      | NCC | FALSE |

|           |     |       |
|-----------|-----|-------|
| Srl       | NCC | FALSE |
| Atp7a     | NCC | FALSE |
| Idh3a     | NCC | FALSE |
| Zfp622    | NCC | TRUE  |
| Pin1      | NCC | FALSE |
| Mcoln3    | NCC | FALSE |
| Car13     | NCC | FALSE |
| Trim23    | NCC | FALSE |
| Banf1     | NCC | FALSE |
| Polr3h    | NCC | FALSE |
| Xylb      | NCC | FALSE |
| Pcf11     | NCC | FALSE |
| Ube2o     | NCC | FALSE |
| Serinc5   | NCC | FALSE |
| Primpol   | NCC | FALSE |
| Mtmr14    | NCC | FALSE |
| 1700008J0 | NCC | FALSE |
| Gltpd1    | NCC | FALSE |
| Dus2      | NCC | FALSE |
| Rnf126    | NCC | FALSE |
| Aprt      | NCC | FALSE |
| Shroom3   | NCC | FALSE |
| Naa30     | NCC | FALSE |
| Ccnk      | NCC | FALSE |
| Rheb1     | NCC | FALSE |
| Tbrg3     | NCC | FALSE |
| Lin52     | NCC | FALSE |
| Zfp146    | NCC | TRUE  |
| Atp13a1   | NCC | FALSE |
| Fam149b   | NCC | FALSE |
| Acsl5     | NCC | FALSE |
| Srd5a3    | NCC | FALSE |
| Adipor2   | NCC | FALSE |
| Bmp5      | NCC | FALSE |
| Rpgr      | NCC | FALSE |
| Prune     | NCC | FALSE |
| Sec24a    | NCC | FALSE |
| Mapk12    | NCC | FALSE |
| Cnpy3     | NCC | FALSE |
| Cep250    | NCC | FALSE |
| Sik2      | NCC | FALSE |
| Tbcd      | NCC | FALSE |
| Zfp958    | NCC | TRUE  |
| Pla2g7    | NCC | FALSE |
| Morc2a    | NCC | FALSE |
| Zbtb21    | NCC | FALSE |
| Kif5b     | NCC | FALSE |
| Icmt      | NCC | FALSE |
| Camsap2   | NCC | FALSE |
| Tmem161t  | NCC | FALSE |

|           |     |       |
|-----------|-----|-------|
| Zfp808    | NCC | FALSE |
| Fam98b    | NCC | FALSE |
| Traf3ip1  | NCC | FALSE |
| Jade1     | NCC | FALSE |
| Wipf2     | NCC | FALSE |
| Nudt11    | NCC | FALSE |
| Trmt13    | NCC | FALSE |
| Actr1b    | NCC | FALSE |
| Rpl9      | NCC | FALSE |
| Gpatch3   | NCC | FALSE |
| Pcgf3     | NCC | FALSE |
| Zbtb46    | NCC | TRUE  |
| Tbc1d5    | NCC | FALSE |
| Galm      | NCC | FALSE |
| Ppp1r14a  | NCC | FALSE |
| Slc25a46  | NCC | FALSE |
| Hist2h2ac | NCC | FALSE |
| BC048403  | NCC | FALSE |
| Hoxa7     | NCC | TRUE  |
| Tmem70    | NCC | FALSE |
| Nrbf2     | NCC | FALSE |
| Ift80     | NCC | FALSE |
| Iqcb1     | NCC | FALSE |
| 4930519F0 | NCC | FALSE |
| Ttc26     | NCC | FALSE |
| Gosr2     | NCC | FALSE |
| Bmi1      | NCC | FALSE |
| Zfp472    | NCC | FALSE |
| Gla       | NCC | FALSE |
| Trmt61b   | NCC | FALSE |
| Cutc      | NCC | FALSE |
| Trp53rk   | NCC | FALSE |
| Otulin    | NCC | FALSE |
| Adat3     | NCC | FALSE |
| Raf1      | NCC | FALSE |
| Zfp101    | NCC | FALSE |
| Grpel1    | NCC | FALSE |
| Alas1     | NCC | FALSE |
| Gm16973   | NCC | FALSE |
| Brf2      | NCC | TRUE  |
| Cnot7     | NCC | FALSE |
| Ufsp2     | NCC | FALSE |
| Mtg1      | NCC | FALSE |
| Baz2a     | NCC | FALSE |
| Fam213a   | NCC | FALSE |
| Recq15    | NCC | FALSE |
| Tbc1d22b  | NCC | FALSE |
| Elmo1     | NCC | FALSE |
| Nf2       | NCC | FALSE |
| Meis1     | NCC | TRUE  |

|           |     |       |
|-----------|-----|-------|
| Nrp2      | NCC | FALSE |
| Mkrn2     | NCC | FALSE |
| Ap4m1     | NCC | FALSE |
| Nsf       | NCC | FALSE |
| Bdp1      | NCC | TRUE  |
| Gtf3a     | NCC | TRUE  |
| 231006110 | NCC | FALSE |
| Plekhf2   | NCC | FALSE |
| Fkrp      | NCC | FALSE |
| Nsfl1c    | NCC | FALSE |
| Zfp800    | NCC | TRUE  |
| BC068281  | NCC | FALSE |
| Zbtb39    | NCC | TRUE  |
| Rce1      | NCC | FALSE |
| Intu      | NCC | FALSE |
| Timm23    | NCC | FALSE |
| Ftsj1     | NCC | FALSE |
| Zdhhc16   | NCC | FALSE |
| Lztf1     | NCC | FALSE |
| Nol12     | NCC | FALSE |
| 2410127L1 | NCC | FALSE |
| Ttc7b     | NCC | FALSE |
| Sepsecs   | NCC | FALSE |
| Nop10     | NCC | FALSE |
| Atxn3     | NCC | FALSE |
| C23005211 | NCC | FALSE |
| Thap1     | NCC | TRUE  |
| Bbs12     | NCC | FALSE |
| Zfp655    | NCC | TRUE  |
| Zfp942    | NCC | FALSE |
| Ino80e    | NCC | FALSE |
| Slc10a3   | NCC | FALSE |
| Adal      | NCC | FALSE |
| Fv1       | NCC | FALSE |
| Gm608     | NCC | FALSE |
| Vdac1     | NCC | FALSE |
| Hoxb1     | NCC | TRUE  |
| Cdkn3     | NCC | FALSE |
| Abhd11os  | NCC | FALSE |
| Mks1      | NCC | FALSE |
| Mars2     | NCC | FALSE |
| Gba2      | NCC | FALSE |
| Qsox2     | NCC | FALSE |
| Lnp       | NCC | FALSE |
| Lins      | NCC | FALSE |
| Alkbh2    | NCC | FALSE |
| Slc15a4   | NCC | FALSE |
| Samd1     | NCC | FALSE |
| Prkacb    | NCC | FALSE |
| Micall1   | NCC | FALSE |

|           |     |       |
|-----------|-----|-------|
| Trappc8   | NCC | FALSE |
| Dus4l     | NCC | FALSE |
| 3110009E1 | NCC | FALSE |
| Tchp      | NCC | FALSE |
| Srf       | NCC | TRUE  |
| Med13l    | NCC | FALSE |
| Chst12    | NCC | FALSE |
| Cpn1      | NCC | FALSE |
| Plekhj1   | NCC | FALSE |
| Ebag9     | NCC | FALSE |
| Cyb5r4    | NCC | FALSE |
| Rwdd2b    | NCC | FALSE |
| Cmtm6     | NCC | FALSE |
| Ccdc138   | NCC | FALSE |
| Pop5      | NCC | FALSE |
| Emilin2   | NCC | FALSE |
| Ppp1r16a  | NCC | FALSE |
| Cbr4      | NCC | FALSE |
| Mlh3      | NCC | FALSE |
| Klf16     | NCC | TRUE  |
| Zbtb33    | NCC | TRUE  |
| Actr5     | NCC | FALSE |
| Prkar2b   | NCC | FALSE |
| Phospho2  | NCC | FALSE |
| Sac3d1    | NCC | FALSE |
| Mbip      | NCC | FALSE |
| Stxbp6    | NCC | FALSE |
| Pir       | NCC | TRUE  |
| Tmem199   | NCC | FALSE |
| Surf2     | NCC | FALSE |
| Gorab     | NCC | FALSE |
| Dyrk2     | NCC | FALSE |
| Daglb     | NCC | FALSE |
| Ufl1      | NCC | FALSE |
| Bpnt1     | NCC | FALSE |
| Zfp760    | NCC | TRUE  |
| Uhrf1bp1l | NCC | FALSE |
| Snhg11    | NCC | FALSE |
| Camsap1   | NCC | FALSE |
| Dtwd2     | NCC | FALSE |
| Spata5l1  | NCC | FALSE |
| Ppp1r1a   | NCC | FALSE |
| Mrs2      | NCC | FALSE |
| Wscd1     | NCC | FALSE |
| Golga3    | NCC | FALSE |
| Nhej1     | NCC | FALSE |
| Zfp81     | NCC | FALSE |
| Pigo      | NCC | FALSE |
| BC037034  | NCC | FALSE |
| Zfp39     | NCC | TRUE  |

|           |     |       |
|-----------|-----|-------|
| Eno3      | NCC | FALSE |
| Slc5a6    | NCC | FALSE |
| Fancf     | NCC | FALSE |
| Adat2     | NCC | FALSE |
| Rhobtb2   | NCC | FALSE |
| Taf1c     | NCC | FALSE |
| 8030462N1 | NCC | FALSE |
| Mtif3     | NCC | FALSE |
| Cep290    | NCC | FALSE |
| Chchd6    | NCC | FALSE |
| Map4k1    | NCC | FALSE |
| Ascc3     | NCC | FALSE |
| Elac1     | NCC | FALSE |
| Papd7     | NCC | FALSE |
| Tbc1d4    | NCC | FALSE |
| Harbi1    | NCC | FALSE |
| Crnde     | NCC | FALSE |
| Pkn3      | NCC | FALSE |
| Lpcat3    | NCC | FALSE |
| Polr2c    | NCC | FALSE |
| Mipol1    | NCC | FALSE |
| Phtf2     | NCC | FALSE |
| Zbtb22    | NCC | TRUE  |
| Ep300     | NCC | TRUE  |
| Vps33b    | NCC | FALSE |
| Prdm15    | NCC | TRUE  |
| Bbs7      | NCC | FALSE |
| Ranbp6    | NCC | FALSE |
| Bcl7c     | NCC | FALSE |
| Mapre1    | NCC | FALSE |
| Thap6     | NCC | FALSE |
| Zyg11b    | NCC | FALSE |
| Slc1a4    | NCC | FALSE |
| Snord12   | NCC | FALSE |
| Utp14b    | NCC | FALSE |
| Neo1      | NCC | FALSE |
| A830080D  | NCC | FALSE |
| Lrp3      | NCC | FALSE |
| Socs4     | NCC | TRUE  |
| Zfp825    | NCC | TRUE  |
| Mtfp1     | NCC | FALSE |
| Pcbd1     | NCC | FALSE |
| Nmnat1    | NCC | FALSE |
| Cldn9     | NCC | FALSE |
| Cep95     | NCC | FALSE |
| Zfp202    | NCC | TRUE  |
| Mul1      | NCC | FALSE |
| 4930539J0 | NCC | FALSE |
| Tpst1     | NCC | FALSE |
| Arhgap12  | NCC | FALSE |

|           |     |       |
|-----------|-----|-------|
| Tmem243   | NCC | FALSE |
| Gadd45a   | NCC | TRUE  |
| Gas2      | NCC | FALSE |
| Cycs      | NCC | TRUE  |
| Cdr2      | NCC | FALSE |
| Vegfc     | NCC | FALSE |
| Taco1     | NCC | FALSE |
| Fahd1     | NCC | FALSE |
| Clk3      | NCC | FALSE |
| Blzf1     | NCC | FALSE |
| Cep104    | NCC | FALSE |
| Abcc8     | NCC | FALSE |
| Camk2d    | NCC | FALSE |
| Vps18     | NCC | FALSE |
| Rab31     | NCC | FALSE |
| Ncln      | NCC | FALSE |
| Katnb1    | NCC | FALSE |
| Ptp4a1    | NCC | FALSE |
| Sfxn1     | NCC | FALSE |
| Prcc      | NCC | FALSE |
| Slc29a2   | NCC | FALSE |
| Lrrfip2   | NCC | FALSE |
| Mtg2      | NCC | FALSE |
| Nipsnap3b | NCC | FALSE |
| Stam2     | NCC | FALSE |
| Ccdc91    | NCC | FALSE |
| Smyd4     | NCC | FALSE |
| Gpank1    | NCC | TRUE  |
| AW209491  | NCC | FALSE |
| Rfesd     | NCC | FALSE |
| Wdr20     | NCC | FALSE |
| Gm10033   | NCC | FALSE |
| Fert2     | NCC | FALSE |
| Ccdc115   | NCC | FALSE |
| Grip1     | NCC | FALSE |
| Eif4a1    | NCC | FALSE |
| Crcp      | NCC | FALSE |
| Car4      | NCC | FALSE |
| Ercc5     | NCC | FALSE |
| Zfp1      | NCC | TRUE  |
| Prkar2a   | NCC | FALSE |
| Tspan5    | NCC | FALSE |
| Rabif     | NCC | FALSE |
| Tatdn1    | NCC | FALSE |
| Hebp1     | NCC | FALSE |
| Bhlhb9    | NCC | FALSE |
| Hoxc8     | NCC | TRUE  |
| Stam      | NCC | FALSE |
| Arl6ip4   | NCC | FALSE |
| Ptcd1     | NCC | TRUE  |



|           |     |       |
|-----------|-----|-------|
| Tomm40l   | NCC | FALSE |
| Fdxr      | NCC | FALSE |
| Steap3    | NCC | FALSE |
| Ddt       | NCC | FALSE |
| Pex12     | NCC | FALSE |
| Slain2    | NCC | FALSE |
| Ipp       | NCC | FALSE |
| Aplf      | NCC | FALSE |
| Taf13     | NCC | FALSE |
| Kras      | NCC | FALSE |
| Guk1      | NCC | FALSE |
| Cdh15     | NCC | FALSE |
| Mcm9      | NCC | FALSE |
| Asb6      | NCC | FALSE |
| Arl6      | NCC | FALSE |
| Cwf19l2   | NCC | FALSE |
| Amacr     | NCC | FALSE |
| Tbk1      | NCC | FALSE |
| Zfp592    | NCC | TRUE  |
| Mtrf1     | NCC | FALSE |
| Uxs1      | NCC | FALSE |
| Scrn3     | NCC | FALSE |
| Zfp934    | NCC | FALSE |
| Rbm48     | NCC | FALSE |
| Vps33a    | NCC | FALSE |
| Hist1h1a  | NCC | FALSE |
| B3galt6   | NCC | FALSE |
| Zbtb45    | NCC | TRUE  |
| Esyt2     | NCC | FALSE |
| Armc6     | NCC | FALSE |
| Trabd     | NCC | FALSE |
| Wdr1      | NCC | FALSE |
| Ppp1r2    | NCC | FALSE |
| Tmem192   | NCC | FALSE |
| Adam9     | NCC | FALSE |
| Zfp652    | NCC | TRUE  |
| 9930104L0 | NCC | FALSE |
| Acsf3     | NCC | FALSE |
| Cdc25b    | NCC | FALSE |
| Zfp512    | NCC | FALSE |
| Ppp2r2d   | NCC | FALSE |
| Fam122b   | NCC | FALSE |
| Cln8      | NCC | FALSE |
| Slc9a5    | NCC | FALSE |
| Elovl5    | NCC | FALSE |
| Fgd6      | NCC | FALSE |
| Med30     | NCC | TRUE  |
| Zfp511    | NCC | FALSE |
| Cbfa2t2   | NCC | TRUE  |
| Ogdh      | NCC | FALSE |

|           |     |       |
|-----------|-----|-------|
| Ctr9      | NCC | FALSE |
| Sec61a2   | NCC | FALSE |
| Snora81   | NCC | FALSE |
| Arl8b     | NCC | FALSE |
| Psm7      | NCC | FALSE |
| Slc25a32  | NCC | FALSE |
| Ccp110    | NCC | FALSE |
| Mrps10    | NCC | FALSE |
| Ankrd13c  | NCC | FALSE |
| Slc38a2   | NCC | FALSE |
| Vdac2     | NCC | FALSE |
| Wdr35     | NCC | FALSE |
| Pik3cb    | NCC | FALSE |
| Prkrip1   | NCC | FALSE |
| Max       | NCC | TRUE  |
| Bnip1     | NCC | FALSE |
| Trmt44    | NCC | FALSE |
| Ppp6c     | NCC | FALSE |
| Fam188a   | NCC | FALSE |
| Dhrs7b    | NCC | FALSE |
| Gyk       | NCC | FALSE |
| Trit1     | NCC | FALSE |
| Phka2     | NCC | FALSE |
| 5430417L2 | NCC | FALSE |
| Cd164     | NCC | FALSE |
| Nrde2     | NCC | FALSE |
| Sp5       | NCC | TRUE  |
| Fancb     | NCC | FALSE |
| Ifrd1     | NCC | FALSE |
| 1700066M  | NCC | FALSE |
| Actg1     | NCC | FALSE |
| Dcaf15    | NCC | FALSE |
| Mtfmt     | NCC | FALSE |
| Tldc1     | NCC | FALSE |
| Fam35a    | NCC | FALSE |
| Btbd7     | NCC | FALSE |
| Plekha3   | NCC | FALSE |
| 2610015PC | NCC | FALSE |
| Gnl3l     | NCC | FALSE |
| Mtx3      | NCC | FALSE |
| Zfp820    | NCC | FALSE |
| Cep162    | NCC | FALSE |
| Tnfrsf21  | NCC | FALSE |
| Chchd3    | NCC | FALSE |
| Dusp19    | NCC | FALSE |
| Slc27a3   | NCC | FALSE |
| Mrc2      | NCC | FALSE |
| D430020J0 | NCC | FALSE |
| Cdh11     | NCC | FALSE |
| Sptlc2    | NCC | FALSE |

|           |     |       |
|-----------|-----|-------|
| AY074887  | NCC | FALSE |
| Pik3c3    | NCC | TRUE  |
| Pptc7     | NCC | FALSE |
| 2210015D1 | NCC | FALSE |
| Dcun1d2   | NCC | FALSE |
| Arl6ip1   | NCC | FALSE |
| Ccdc15    | NCC | FALSE |
| Cask      | NCC | FALSE |
| Rtkn2     | NCC | FALSE |
| Plekha7   | NCC | FALSE |
| Fgd4      | NCC | FALSE |
| Slc9a1    | NCC | FALSE |
| Tmem206   | NCC | FALSE |
| Znhit2    | NCC | FALSE |
| Zfp113    | NCC | TRUE  |
| 2010015L0 | NCC | FALSE |
| Pxmp2     | NCC | FALSE |
| 1110004F1 | NCC | FALSE |
| Kctd2     | NCC | FALSE |
| Mob2      | NCC | FALSE |
| Alg12     | NCC | FALSE |
| Dolpp1    | NCC | FALSE |
| Sipa1l3   | NCC | FALSE |
| Tmem41a   | NCC | FALSE |
| Crbn      | NCC | FALSE |
| Fhod3     | NCC | FALSE |
| Ldlrad3   | NCC | FALSE |
| Lactb     | NCC | FALSE |
| Dtnbp1    | NCC | FALSE |
| Tmem177   | NCC | FALSE |
| Gbe1      | NCC | FALSE |
| Ube2cbp   | NCC | FALSE |
| Ggps1     | NCC | FALSE |
| Armc9     | NCC | FALSE |
| 3000002C1 | NCC | FALSE |
| Zfp763    | NCC | FALSE |
| Fez2      | NCC | FALSE |
| Aasdh     | NCC | FALSE |
| Sep-06    | NCC | FALSE |
| Wwp1      | NCC | FALSE |
| Acsl1     | NCC | FALSE |
| Rrp1      | NCC | FALSE |
| Thap2     | NCC | FALSE |
| Gm15455   | NCC | FALSE |
| Phf8      | NCC | TRUE  |
| Chst1     | NCC | FALSE |
| Fem1a     | NCC | FALSE |
| 9630033F2 | NCC | FALSE |
| Fam208a   | NCC | FALSE |
| Fnbp4     | NCC | FALSE |

|           |     |       |
|-----------|-----|-------|
| Pak1ip1   | NCC | FALSE |
| Lca5      | NCC | FALSE |
| Cspp1     | NCC | FALSE |
| Foxj3     | NCC | TRUE  |
| 2810021J2 | NCC | FALSE |
| Pitpnm2   | NCC | FALSE |
| Etohi1    | NCC | FALSE |
| Dnajc15   | NCC | FALSE |
| Psm4      | NCC | FALSE |
| Brap      | NCC | FALSE |
| Mfn1      | NCC | FALSE |
| Dnajb1    | NCC | FALSE |
| Vps26b    | NCC | FALSE |
| Fancg     | NCC | FALSE |
| Txn14b    | NCC | FALSE |
| Tnfsf9    | NCC | FALSE |
| Vill      | NCC | FALSE |
| Ankrd9    | NCC | FALSE |
| Hoxd1     | NCC | TRUE  |
| Commd10   | NCC | FALSE |
| Fam192a   | NCC | FALSE |
| Gfod2     | NCC | FALSE |
| Fat3      | NCC | FALSE |
| Actb      | NCC | FALSE |
| Dpcd      | NCC | FALSE |
| Pank1     | NCC | FALSE |
| Stub1     | NCC | TRUE  |
| Trp53bp2  | NCC | FALSE |
| Gdpgp1    | NCC | FALSE |
| Acad11    | NCC | FALSE |
| Chml      | NCC | FALSE |
| Ccl25     | NCC | FALSE |
| Gpi1      | NCC | FALSE |
| Raet1e    | NCC | FALSE |
| Asx3      | NCC | FALSE |
| Vezf1     | NCC | TRUE  |
| Tmem126f  | NCC | FALSE |
| Ogfod3    | NCC | FALSE |
| Hpcal1    | NCC | FALSE |
| Pi4kb     | NCC | FALSE |
| Rccd1     | NCC | FALSE |
| Angptl1   | NCC | FALSE |
| Artn      | NCC | FALSE |
| Gm13154   | NCC | FALSE |
| Ino80c    | NCC | FALSE |
| Nubp2     | NCC | FALSE |
| Dennd5b   | NCC | FALSE |
| C230091D  | NCC | FALSE |
| Zhx1      | NCC | TRUE  |
| Pgp       | NCC | FALSE |

|           |     |       |
|-----------|-----|-------|
| Tmem132a  | NCC | FALSE |
| Pvrl1     | NCC | FALSE |
| Sema3a    | NCC | FALSE |
| Aimp1     | NCC | FALSE |
| Eif2b4    | NCC | FALSE |
| Ap4e1     | NCC | FALSE |
| Gpatch1   | NCC | FALSE |
| Lama5     | NCC | FALSE |
| Cep41     | NCC | FALSE |
| Cyc1      | NCC | FALSE |
| Snord69   | NCC | FALSE |
| Zfp180    | NCC | TRUE  |
| Rint1     | NCC | FALSE |
| Ak2       | NCC | FALSE |
| Tmem135   | NCC | FALSE |
| Scyl2     | NCC | FALSE |
| Arhgap32  | NCC | FALSE |
| Bbs5      | NCC | FALSE |
| Slc41a1   | NCC | FALSE |
| Dnajc5    | NCC | FALSE |
| Inpp4b    | NCC | FALSE |
| Rabggta   | NCC | FALSE |
| Zfp335    | NCC | TRUE  |
| Pth1r     | NCC | FALSE |
| Hdx       | NCC | TRUE  |
| Zfp454    | NCC | TRUE  |
| 4632415L0 | NCC | FALSE |
| Syde2     | NCC | FALSE |
| Lcmt2     | NCC | FALSE |
| Safb      | NCC | FALSE |
| C2cd5     | NCC | FALSE |
| Slitrk5   | NCC | FALSE |
| Pradc1    | NCC | FALSE |
| Dohh      | NCC | FALSE |
| Gatc      | NCC | FALSE |
| Uap1      | NCC | FALSE |
| Cops5     | NCC | FALSE |
| Mocs3     | NCC | FALSE |
| Med11     | NCC | FALSE |
| Meox1     | NCC | TRUE  |
| Atxn7l3   | NCC | FALSE |
| Zfp946    | NCC | FALSE |
| Btbd6     | NCC | FALSE |
| Sav1      | NCC | FALSE |
| 9930012K1 | NCC | FALSE |
| 4933427D1 | NCC | FALSE |
| Hoxd11    | NCC | TRUE  |
| Slc52a2   | NCC | FALSE |
| Ccdc171   | NCC | FALSE |
| Casp7     | NCC | FALSE |

|           |     |       |
|-----------|-----|-------|
| Mkrn3     | NCC | FALSE |
| 2810002D1 | NCC | FALSE |
| Prepl     | NCC | FALSE |
| 4931414P1 | NCC | FALSE |
| Pappa     | NCC | FALSE |
| Mospd1    | NCC | FALSE |
| Atg7      | NCC | FALSE |
| Mrpl55    | NCC | FALSE |
| Zfp110    | NCC | TRUE  |
| Lrch2     | NCC | FALSE |
| Irak1bp1  | NCC | FALSE |
| Alkbh7    | NCC | FALSE |
| Gls       | NCC | FALSE |
| Slc16a13  | NCC | FALSE |
| Zranb1    | NCC | FALSE |
| Ptk2      | NCC | FALSE |
| Ermard    | NCC | FALSE |
| Doc2a     | NCC | FALSE |
| Zfp944    | NCC | FALSE |
| Stc2      | NCC | FALSE |
| Snord100  | NCC | FALSE |
| Zfp449    | NCC | TRUE  |
| Adar      | NCC | FALSE |
| 3110045C2 | NCC | FALSE |
| Zfp955a   | NCC | FALSE |
| Leprel1   | NCC | FALSE |
| Pnkd      | NCC | FALSE |
| Ppcdc     | NCC | FALSE |
| Fkbp1     | NCC | FALSE |
| Lig4      | NCC | FALSE |
| Ppp1r10   | NCC | TRUE  |
| Zfp647    | NCC | TRUE  |
| Card10    | NCC | FALSE |
| D930016D1 | NCC | FALSE |
| Acer3     | NCC | FALSE |
| Slc7a1    | NCC | FALSE |
| Zbtb10    | NCC | FALSE |
| Ankfy1    | NCC | FALSE |
| 9130023H2 | NCC | TRUE  |
| Preld1    | NCC | FALSE |
| Stk17b    | NCC | FALSE |
| Dixdc1    | NCC | FALSE |
| Zbtb40    | NCC | TRUE  |
| Amotl2    | NCC | FALSE |
| Mettl20   | NCC | FALSE |
| Rab35     | NCC | FALSE |
| Colec12   | NCC | FALSE |
| Zdhhc7    | NCC | FALSE |
| Zfp719    | NCC | TRUE  |
| Paip1     | NCC | FALSE |

|           |     |       |
|-----------|-----|-------|
| Dus3l     | NCC | TRUE  |
| 9130008F2 | NCC | FALSE |
| Suclg1    | NCC | TRUE  |
| Dpagt1    | NCC | FALSE |
| Usp33     | NCC | FALSE |
| Pnpla7    | NCC | FALSE |
| Gpd1l     | NCC | FALSE |
| Zfp748    | NCC | FALSE |
| Lysmd3    | NCC | FALSE |
| Arl13b    | NCC | FALSE |
| Trim39    | NCC | FALSE |
| 2410004B1 | NCC | FALSE |
| Cdk16     | NCC | FALSE |
| Rbm3      | NCC | TRUE  |
| Stradb    | NCC | FALSE |
| Pyroxd1   | NCC | FALSE |
| Lym5      | NCC | FALSE |
| Rab40c    | NCC | FALSE |
| Zfp938    | NCC | TRUE  |
| 6430573F1 | NCC | FALSE |
| Maoa      | NCC | FALSE |
| Rbak      | NCC | TRUE  |
| Pias4     | NCC | FALSE |
| Fjx1      | NCC | FALSE |
| Wfdc2     | NCC | FALSE |
| Hps1      | NCC | FALSE |
| Mta3      | NCC | TRUE  |
| Gtdc1     | NCC | FALSE |
| Kcnh2     | NCC | FALSE |
| Clpp      | NCC | FALSE |
| Snord49a  | NCC | FALSE |
| Zbtbd6    | NCC | FALSE |
| 5830415F0 | NCC | FALSE |
| Tpgs2     | NCC | FALSE |
| Pigk      | NCC | FALSE |
| Vps11     | NCC | FALSE |
| C87436    | NCC | FALSE |
| Lin7c     | NCC | FALSE |
| Dnajc25   | NCC | FALSE |
| Ripk3     | NCC | FALSE |
| Nfkb2     | NCC | TRUE  |
| Lsm10     | NCC | FALSE |
| Slmo1     | NCC | FALSE |
| Rab11fip3 | NCC | FALSE |
| Klhdc2    | NCC | FALSE |
| Dpy19l4   | NCC | FALSE |
| Hgsnat    | NCC | FALSE |
| Prdm10    | NCC | TRUE  |
| Kri1      | NCC | FALSE |
| Zfp955b   | NCC | FALSE |

|           |     |       |
|-----------|-----|-------|
| Yipf6     | NCC | FALSE |
| Fbxo33    | NCC | FALSE |
| Arfgef2   | NCC | FALSE |
| Rhbdd2    | NCC | FALSE |
| Mif4gd    | NCC | FALSE |
| Wdr34     | NCC | FALSE |
| Itm2a     | NCC | FALSE |
| Snapc1    | NCC | FALSE |
| 261004401 | NCC | TRUE  |
| 2410131K1 | NCC | FALSE |
| Tmem194t  | NCC | FALSE |
| Snord35a  | NCC | FALSE |
| Klk8      | NCC | FALSE |
| Kit       | NCC | FALSE |
| Atp8b2    | NCC | FALSE |
| Ftx       | NCC | FALSE |
| Sirpa     | NCC | FALSE |
| Mttp      | NCC | FALSE |
| Ccdc94    | NCC | FALSE |
| A630072M  | NCC | FALSE |
| Gmcl1     | NCC | FALSE |
| Sf3b5     | NCC | FALSE |
| Ccdc71l   | NCC | FALSE |
| Hspbp1    | NCC | FALSE |
| Zc3h10    | NCC | FALSE |
| Rabep2    | NCC | FALSE |
| Rassf3    | NCC | FALSE |
| Hps4      | NCC | FALSE |
| Htt       | NCC | FALSE |
| Ddx26b    | NCC | FALSE |
| Atg16l1   | NCC | FALSE |
| Ccdc51    | NCC | FALSE |
| B3gntl1   | NCC | FALSE |
| Rad51d    | NCC | FALSE |
| Ofd1      | NCC | FALSE |
| Dync2h1   | NCC | FALSE |
| Aspscr1   | NCC | TRUE  |
| Zfp74     | NCC | TRUE  |
| Brat1     | NCC | FALSE |
| Hpd1      | NCC | FALSE |
| Uevld     | NCC | FALSE |
| Chmp3     | NCC | FALSE |
| 6330416G1 | NCC | FALSE |
| 3110001I2 | NCC | FALSE |
| Klhl2     | NCC | FALSE |
| Raet1d    | NCC | FALSE |
| Zfp940    | NCC | FALSE |
| Brd2      | NCC | FALSE |
| Mettl18   | NCC | FALSE |
| Mettl15   | NCC | FALSE |



|             |     |       |
|-------------|-----|-------|
| Lclat1      | NCC | FALSE |
| Efcab7      | NCC | FALSE |
| Nespas      | NCC | FALSE |
| Lrrc57      | NCC | FALSE |
| Tctn2       | NCC | FALSE |
| Efcab11     | NCC | FALSE |
| Acat2       | NCC | FALSE |
| Arrdc4      | NCC | FALSE |
| Scfd2       | NCC | FALSE |
| Fam162a     | NCC | FALSE |
| Ddx55       | NCC | FALSE |
| Sh3bgrl2    | NCC | FALSE |
| Rnpc3       | NCC | FALSE |
| 2510009E0   | NCC | FALSE |
| Pdpr        | NCC | FALSE |
| Zfp644      | NCC | FALSE |
| Srd5a1      | NCC | FALSE |
| Klhdc9      | NCC | FALSE |
| Foxd2os     | NCC | FALSE |
| Vegfb       | NCC | FALSE |
| Snora33     | NCC | FALSE |
| Snord16a    | NCC | FALSE |
| Tomt        | NCC | FALSE |
| Col23a1     | NCC | FALSE |
| Vav2        | NCC | FALSE |
| D1Erttd622i | NCC | FALSE |
| Frmd4b      | NCC | FALSE |
| Pak1        | NCC | FALSE |
| Abcc1       | NCC | FALSE |
| Wdfy2       | NCC | FALSE |
| Casc3       | NCC | FALSE |
| Elp5        | NCC | FALSE |
| Cabin1      | NCC | FALSE |
| AK129341    | NCC | FALSE |
| Tubd1       | NCC | FALSE |
| Pex26       | NCC | FALSE |
| Fut11       | NCC | FALSE |
| 1700011H1   | NCC | FALSE |
| A630012PC   | NCC | FALSE |
| Unc5c       | NCC | FALSE |
| 2810429I0   | NCC | FALSE |
| Cyb5rl      | NCC | FALSE |
| Prr5l       | NCC | FALSE |
| A230072CC   | NCC | FALSE |
| 2610002J0   | NCC | FALSE |
| Trmt112     | NCC | FALSE |
| Fam117b     | NCC | FALSE |
| Nsun6       | NCC | FALSE |
| Zfp248      | NCC | TRUE  |
| Mex3b       | NCC | FALSE |

|           |     |       |
|-----------|-----|-------|
| Dclre1c   | NCC | FALSE |
| Atf2      | NCC | TRUE  |
| Snora28   | NCC | FALSE |
| Pkhd1     | NCC | FALSE |
| Spen      | NCC | FALSE |
| Ier5l     | NCC | FALSE |
| Usp12     | NCC | FALSE |
| Lrrc51    | NCC | FALSE |
| Lpcat4    | NCC | FALSE |
| Acvr2a    | NCC | FALSE |
| Gdap2     | NCC | FALSE |
| Pdik1l    | NCC | FALSE |
| E130317F2 | NCC | FALSE |
| Sema5b    | NCC | FALSE |
| Usp31     | NCC | FALSE |
| Nabp1     | NCC | FALSE |
| Klhdc10   | NCC | FALSE |
| Man2a1    | NCC | FALSE |
| Rora      | NCC | TRUE  |
| Uhmk1     | NCC | FALSE |
| Tmem189   | NCC | FALSE |
| Bcdin3d   | NCC | FALSE |
| Swt1      | NCC | FALSE |
| Trp53i11  | NCC | FALSE |
| Rab11fip1 | NCC | FALSE |
| Heatr6    | NCC | FALSE |
| Myo5b     | NCC | FALSE |
| Rybp      | NCC | FALSE |
| Zfp446    | NCC | FALSE |
| B230217C1 | NCC | FALSE |
| Ubac1     | NCC | FALSE |
| Zfp787    | NCC | TRUE  |
| Fut4      | NCC | FALSE |
| Hmbox1    | NCC | TRUE  |
| Dffa      | NCC | FALSE |
| Sacs      | NCC | FALSE |
| Echdc2    | NCC | FALSE |
| Zfp788    | NCC | FALSE |
| Selt      | NCC | FALSE |
| Ankzf1    | NCC | FALSE |
| Vps13b    | NCC | FALSE |
| Trim11    | NCC | FALSE |
| Cep19     | NCC | FALSE |
| Higd1a    | NCC | FALSE |
| Dnajc3    | NCC | FALSE |
| Smpdl3b   | NCC | FALSE |
| Slc33a1   | NCC | FALSE |
| Kifc1     | NCC | FALSE |
| Dnaja1    | NCC | FALSE |
| Gpatch2l  | NCC | FALSE |

|           |     |       |
|-----------|-----|-------|
| Efnb2     | NCC | FALSE |
| Skida1    | NCC | FALSE |
| 8430429K0 | NCC | FALSE |
| C030006K1 | NCC | FALSE |
| Tmed8     | NCC | FALSE |
| Sdf2l1    | NCC | FALSE |
| Zfp65     | NCC | FALSE |
| 4930414L2 | NCC | FALSE |
| Snord65   | NCC | FALSE |
| Ppp1r13l  | NCC | FALSE |
| Tshz3     | NCC | FALSE |
| 2210408l2 | NCC | FALSE |
| Wnt5b     | NCC | FALSE |
| Crispld2  | NCC | FALSE |
| Bcap29    | NCC | FALSE |
| Smg9      | NCC | FALSE |
| Pdzk1     | NCC | FALSE |
| Zfp37     | NCC | TRUE  |
| Rsad1     | NCC | FALSE |
| 9530091CC | NCC | FALSE |
| Adrm1     | NCC | FALSE |
| Ncoa7     | NCC | FALSE |
| Zfand2a   | NCC | FALSE |
| Nudcd3    | NCC | FALSE |
| Podxl     | NCC | FALSE |
| Ssu72     | NCC | FALSE |
| Zfp58     | NCC | FALSE |
| Sap30l    | NCC | FALSE |
| Slc7a7    | NCC | FALSE |
| Frzb      | NCC | FALSE |
| Eif2b2    | NCC | FALSE |
| P4ha1     | NCC | FALSE |
| Med25     | NCC | FALSE |
| Atl3      | NCC | FALSE |
| Dnajc17   | NCC | FALSE |
| Nuak2     | NCC | TRUE  |
| Tpi1      | NCC | TRUE  |
| Ino80d    | NCC | FALSE |
| Mettl22   | NCC | FALSE |
| Al837181  | NCC | FALSE |
| Atg12     | NCC | FALSE |
| Zfp599    | NCC | FALSE |
| Gm5141    | NCC | FALSE |
| Qprt      | NCC | FALSE |
| Slc39a14  | NCC | FALSE |
| Wdr25     | NCC | FALSE |
| Ubxn8     | NCC | FALSE |
| Hist2h2bb | NCC | FALSE |
| Golga5    | NCC | FALSE |
| Slc25a1   | NCC | FALSE |

|           |     |       |
|-----------|-----|-------|
| Chpf      | NCC | FALSE |
| Lrrc28    | NCC | FALSE |
| Gdap10    | NCC | FALSE |
| Lrrc61    | NCC | FALSE |
| Nudt22    | NCC | FALSE |
| Plag1     | NCC | TRUE  |
| Ciapi1    | NCC | FALSE |
| Ube2s     | NCC | FALSE |
| Socs1     | NCC | FALSE |
| Srpr      | NCC | FALSE |
| Tbrg1     | NCC | FALSE |
| Gjb5      | NCC | FALSE |
| Snx11     | NCC | FALSE |
| Fam135a   | NCC | FALSE |
| Inpp5f    | NCC | FALSE |
| Tmem141   | NCC | FALSE |
| Myo7a     | NCC | FALSE |
| 9130011E1 | NCC | FALSE |
| Ttc7      | NCC | FALSE |
| Poc5      | NCC | FALSE |
| Sppl2a    | NCC | FALSE |
| 3110021N2 | NCC | FALSE |
| Tssk6     | NCC | FALSE |
| L3hypdh   | NCC | FALSE |
| Shf       | NCC | FALSE |
| Setd7     | NCC | FALSE |
| Ube4a     | NCC | FALSE |
| Pafah1b1  | NCC | FALSE |
| Zfp943    | NCC | FALSE |
| Otud5     | NCC | FALSE |
| Map2k2    | NCC | FALSE |
| Gprc5a    | NCC | FALSE |
| Kifc5b    | NCC | FALSE |
| Exoc8     | NCC | FALSE |
| Gpr37     | NCC | FALSE |
| Alg1      | NCC | FALSE |
| Xrn1      | NCC | FALSE |
| Itfg2     | NCC | FALSE |
| Efcab2    | NCC | FALSE |
| Amt       | NCC | FALSE |
| Slc25a22  | NCC | FALSE |
| Psm13     | NCC | FALSE |
| Fbxo31    | NCC | FALSE |
| Pfkfb1    | NCC | FALSE |
| Sec13     | NCC | FALSE |
| Cog7      | NCC | FALSE |
| Zfp870    | NCC | FALSE |
| Wdr19     | NCC | FALSE |
| Ncs1      | NCC | FALSE |
| Mtap7d3   | NCC | FALSE |

|           |     |       |
|-----------|-----|-------|
| Tmem17    | NCC | FALSE |
| Fpgt      | NCC | FALSE |
| Slc35b3   | NCC | FALSE |
| Klhl17    | NCC | FALSE |
| Zfp189    | NCC | TRUE  |
| Ascc1     | NCC | TRUE  |
| Zfp53     | NCC | FALSE |
| Ankrd40   | NCC | FALSE |
| Psen1     | NCC | FALSE |
| 17000480  | NCC | FALSE |
| ltpkc     | NCC | FALSE |
| Ube2g2    | NCC | FALSE |
| Uvrag     | NCC | FALSE |
| Tbc1d22a  | NCC | FALSE |
| G6pc3     | NCC | FALSE |
| 4632428N  | NCC | FALSE |
| Zfp661    | NCC | TRUE  |
| Bex1      | NCC | FALSE |
| Slc16a6   | NCC | FALSE |
| Slc38a7   | NCC | FALSE |
| Zfp874a   | NCC | FALSE |
| Gphn      | NCC | FALSE |
| Rasip1    | NCC | FALSE |
| Pipox     | NCC | FALSE |
| Aacs      | NCC | FALSE |
| Mrps23    | NCC | FALSE |
| Pcyt1b    | NCC | FALSE |
| Klhl11    | NCC | FALSE |
| Timmdc1   | NCC | FALSE |
| Rnf113a2  | NCC | FALSE |
| Ift122    | NCC | FALSE |
| Sp8       | NCC | TRUE  |
| Nfil3     | NCC | TRUE  |
| Rabgef1   | NCC | FALSE |
| Ccdc88c   | NCC | FALSE |
| Ildr2     | NCC | FALSE |
| Snrnp35   | NCC | FALSE |
| Mad2l2    | NCC | FALSE |
| Ppp3cb    | NCC | FALSE |
| Gpr157    | NCC | FALSE |
| Kptn      | NCC | FALSE |
| Rnf113a1  | NCC | FALSE |
| Klhl20    | NCC | FALSE |
| Zfp697    | NCC | TRUE  |
| A730017C2 | NCC | FALSE |
| Ccdc57    | NCC | FALSE |
| Hltf      | NCC | TRUE  |
| Klhl15    | NCC | FALSE |
| Zbed5     | NCC | FALSE |
| Triobp    | NCC | FALSE |

|           |     |       |
|-----------|-----|-------|
| Zfp935    | NCC | TRUE  |
| Ccng1     | NCC | FALSE |
| Slc25a44  | NCC | FALSE |
| Col4a6    | NCC | FALSE |
| Srp9      | NCC | TRUE  |
| Fbxo45    | NCC | FALSE |
| Parp11    | NCC | FALSE |
| Tigd2     | NCC | FALSE |
| Atp5s     | NCC | FALSE |
| Gm5595    | NCC | FALSE |
| Vps53     | NCC | FALSE |
| Casp3     | NCC | FALSE |
| Msx2      | NCC | TRUE  |
| Retsat    | NCC | FALSE |
| Kctd9     | NCC | FALSE |
| Enox1     | NCC | FALSE |
| Xkr8      | NCC | FALSE |
| Pard6b    | NCC | FALSE |
| Rnf170    | NCC | FALSE |
| Cpox      | NCC | FALSE |
| Cdip1     | NCC | FALSE |
| Gpld1     | NCC | FALSE |
| A930004D  | NCC | FALSE |
| Rufy1     | NCC | FALSE |
| Zfp873    | NCC | FALSE |
| Trmt10b   | NCC | FALSE |
| Gm14326   | NCC | TRUE  |
| Gosr1     | NCC | FALSE |
| Sec22c    | NCC | FALSE |
| Sil1      | NCC | FALSE |
| Ttc14     | NCC | FALSE |
| Smg6      | NCC | FALSE |
| Hoxa6     | NCC | TRUE  |
| Nek3      | NCC | FALSE |
| Itpk1     | NCC | FALSE |
| Sergef    | NCC | FALSE |
| 4930430F0 | NCC | FALSE |
| 1600002K0 | NCC | FALSE |
| Rgl3      | NCC | FALSE |
| Heatr5b   | NCC | FALSE |
| Triap1    | NCC | FALSE |
| Slfn9     | NCC | FALSE |
| Zfyve21   | NCC | FALSE |
| Snora3    | NCC | FALSE |
| 1700007L1 | NCC | FALSE |
| Tapt1     | NCC | FALSE |
| Uvssa     | NCC | FALSE |
| Apmap     | NCC | FALSE |
| Armcx5    | NCC | FALSE |
| 2010204K1 | NCC | FALSE |

|            |     |       |
|------------|-----|-------|
| Mon1b      | NCC | FALSE |
| Mbnl3      | NCC | FALSE |
| Mtfr2      | NCC | FALSE |
| Rpl19      | NCC | FALSE |
| Tfb2m      | NCC | FALSE |
| Zfp959     | NCC | TRUE  |
| D930007P1  | NCC | FALSE |
| Hist1h3d   | NCC | FALSE |
| Terf2ip    | NCC | FALSE |
| Hook2      | NCC | FALSE |
| Nt5c2      | NCC | FALSE |
| Wdr91      | NCC | FALSE |
| Prpsap2    | NCC | FALSE |
| Dnajc8     | NCC | FALSE |
| Parp16     | NCC | FALSE |
| Mettl17    | NCC | FALSE |
| Rbck1      | NCC | FALSE |
| Znrd1as    | NCC | FALSE |
| D5Erttd579 | NCC | FALSE |
| Aftph      | NCC | FALSE |
| I7Rn6      | NCC | FALSE |
| Palm3      | NCC | FALSE |
| Ripk1      | NCC | FALSE |
| Arsi       | NCC | FALSE |
| Nudt17     | NCC | FALSE |
| Ptpn1      | NCC | FALSE |
| Csgalnact2 | NCC | FALSE |
| Mief2      | NCC | FALSE |
| Ppme1      | NCC | FALSE |
| Tmco6      | NCC | FALSE |
| Als2       | NCC | FALSE |
| Actr8      | NCC | FALSE |
| Dhx32      | NCC | FALSE |
| Dhdh       | NCC | FALSE |
| AI450353   | NCC | FALSE |
| Dennd4b    | NCC | FALSE |
| Poli       | NCC | TRUE  |
| Znrf2      | NCC | FALSE |
| Antxr2     | NCC | FALSE |
| Ahdc1      | NCC | FALSE |
| Lnx1       | NCC | FALSE |
| Tgoln1     | NCC | FALSE |
| Med13      | NCC | FALSE |
| Zfp868     | NCC | TRUE  |
| Mus81      | NCC | FALSE |
| Msl3l2     | NCC | FALSE |
| Hmgn5      | NCC | FALSE |
| Rpl23a     | NCC | FALSE |
| Rps27      | NCC | FALSE |
| D7Erttd715 | NCC | FALSE |

|           |     |       |
|-----------|-----|-------|
| Kctd6     | NCC | FALSE |
| Jagn1     | NCC | FALSE |
| Gak       | NCC | FALSE |
| E4f1      | NCC | TRUE  |
| Lss       | NCC | FALSE |
| Irs2      | NCC | FALSE |
| H60b      | NCC | FALSE |
| Gm11944   | NCC | FALSE |
| Aldh3a2   | NCC | FALSE |
| Ptch2     | NCC | FALSE |
| Fitm2     | NCC | FALSE |
| Bbs10     | NCC | FALSE |
| Bok       | NCC | FALSE |
| Mar-06    | NCC | FALSE |
| Fdxacb1   | NCC | FALSE |
| Mark2     | NCC | FALSE |
| Kdsr      | NCC | FALSE |
| Prpf18    | NCC | FALSE |
| Ptpla     | NCC | FALSE |
| Klhl18    | NCC | FALSE |
| Slc9a8    | NCC | FALSE |
| 493340401 | NCC | FALSE |
| Mrps28    | NCC | FALSE |
| Zfp87     | NCC | FALSE |
| Cyb5r1    | NCC | TRUE  |
| Ptrh1     | NCC | FALSE |
| Slc39a8   | NCC | FALSE |
| Stbd1     | NCC | FALSE |
| Zfp72     | NCC | FALSE |
| Fam21     | NCC | FALSE |
| Mfn2      | NCC | FALSE |
| Apbb2     | NCC | FALSE |
| Mzt2      | NCC | FALSE |
| Snord32a  | NCC | FALSE |
| Anxa7     | NCC | FALSE |
| Ezr       | NCC | TRUE  |
| Dph3      | NCC | FALSE |
| 9430020K0 | NCC | FALSE |
| Creld2    | NCC | FALSE |
| Stau2     | NCC | TRUE  |
| Hras      | NCC | FALSE |
| Mettl25   | NCC | FALSE |
| Zfp758    | NCC | FALSE |
| Fam172a   | NCC | FALSE |
| Kank2     | NCC | FALSE |
| Gm3219    | NCC | FALSE |
| Ly6e      | NCC | FALSE |
| Taf7      | NCC | TRUE  |
| Spsb3     | NCC | FALSE |
| Tctn3     | NCC | FALSE |



|           |     |       |
|-----------|-----|-------|
| 1700037H  | NCC | FALSE |
| 1810044D  | NCC | FALSE |
| Rpl27     | NCC | FALSE |
| Dcun1d3   | NCC | FALSE |
| Zscan20   | NCC | TRUE  |
| 4930513N1 | NCC | FALSE |
| Prss36    | NCC | FALSE |
| Nudt10    | NCC | FALSE |
| Zfp764    | NCC | TRUE  |
| Mrm1      | NCC | FALSE |
| Gm10336   | NCC | FALSE |
| Zfp109    | NCC | TRUE  |
| Dhtkd1    | NCC | FALSE |
| Stat5b    | NCC | TRUE  |
| Ralgapb   | NCC | FALSE |
| Wdr37     | NCC | FALSE |
| 2610002M  | NCC | FALSE |
| Pgbd1     | NCC | FALSE |
| Adamtsl4  | NCC | FALSE |
| Gyltl1b   | NCC | FALSE |
| Narfl     | NCC | FALSE |
| Fbxo16    | NCC | FALSE |
| D17Wsu92  | NCC | FALSE |
| Aard      | NCC | FALSE |
| Zbtb24    | NCC | TRUE  |
| D030028A  | NCC | FALSE |
| Msrb3     | NCC | TRUE  |
| Gpc4      | NCC | FALSE |
| Renbp     | NCC | FALSE |
| Spopl     | NCC | FALSE |
| Mlf1      | NCC | FALSE |
| D430042O  | NCC | FALSE |
| Mblac1    | NCC | FALSE |
| Aptx      | NCC | FALSE |
| lqce      | NCC | FALSE |
| Hps3      | NCC | FALSE |
| Pigb      | NCC | FALSE |
| Tecpr2    | NCC | FALSE |
| Spag16    | NCC | FALSE |
| U2af1     | NCC | TRUE  |
| Tmem109   | NCC | FALSE |
| Tk2       | NCC | FALSE |
| Tsc1      | NCC | FALSE |
| Atg2b     | NCC | FALSE |
| Zfp263    | NCC | TRUE  |
| Psmb10    | NCC | FALSE |
| Pklr      | NCC | FALSE |
| Elovl6    | NCC | FALSE |
| Hoxc9     | NCC | TRUE  |
| Ngrn      | NCC | FALSE |

|          |     |       |
|----------|-----|-------|
| Steap2   | NCC | FALSE |
| Mvd      | NCC | FALSE |
| Stx17    | NCC | FALSE |
| Arl2     | NCC | FALSE |
| Abcb10   | NCC | FALSE |
| Aoc2     | NCC | FALSE |
| Arhgap18 | NCC | FALSE |
| Cmah     | NCC | FALSE |
| Pdcp     | NCC | FALSE |
| Slc25a40 | NCC | FALSE |
| Nckip5d  | NCC | FALSE |
| Zfp2     | NCC | TRUE  |
| Ccdc32   | NCC | FALSE |
| Gas2l3   | NCC | FALSE |
| Snx14    | NCC | FALSE |
| Jmy      | NCC | FALSE |
| Armc8    | NCC | FALSE |
| Mtmr11   | NCC | FALSE |
| Arl16    | NCC | FALSE |
| Oxnad1   | NCC | FALSE |
| Slc38a6  | NCC | FALSE |
| Fgfr3    | NCC | FALSE |
| Tmx1     | NCC | FALSE |
| Mctp2    | NCC | TRUE  |
| Helb     | NCC | FALSE |
| Capn10   | NCC | FALSE |
| Mzt1     | NCC | FALSE |
| Rps6kc1  | NCC | FALSE |
| Nfkbil1  | NCC | FALSE |
| Zfp286   | NCC | TRUE  |
| Setbp1   | NCC | TRUE  |
| Rap1a    | NCC | FALSE |
| Tbc1d19  | NCC | FALSE |
| Oscp1    | NCC | FALSE |
| Angptl4  | NCC | FALSE |
| H2afy2   | NCC | FALSE |
| Snord87  | NCC | FALSE |
| Zfp809   | NCC | FALSE |
| Klf15    | NCC | TRUE  |
| Disp1    | NCC | FALSE |
| Ctdspl   | NCC | FALSE |
| Erc1     | NCC | FALSE |
| Ufsp1    | NCC | FALSE |
| Csnk1g3  | NCC | FALSE |
| Snord17  | NCC | FALSE |
| Hddc3    | NCC | FALSE |
| Thns12   | NCC | FALSE |
| B4galnt4 | NCC | FALSE |
| Cgn      | NCC | FALSE |
| Tprn     | NCC | FALSE |

|            |     |       |
|------------|-----|-------|
| Zfp867     | NCC | TRUE  |
| Phf21b     | NCC | FALSE |
| Col9a1     | NCC | FALSE |
| Nup210l    | NCC | FALSE |
| Gm7102     | NCC | FALSE |
| Hip1r      | NCC | FALSE |
| Nkap       | NCC | FALSE |
| Foxe3      | NCC | TRUE  |
| Arhgap29   | NCC | FALSE |
| Dnajb14    | NCC | FALSE |
| Fam185a    | NCC | FALSE |
| Tbck       | NCC | FALSE |
| Rasal2     | NCC | FALSE |
| 2410089E0  | NCC | FALSE |
| Snx13      | NCC | FALSE |
| Snora61    | NCC | FALSE |
| Chp1       | NCC | FALSE |
| Ccdc166    | NCC | FALSE |
| AW554918   | NCC | FALSE |
| Dhrs13     | NCC | FALSE |
| Mboat2     | NCC | FALSE |
| Cyb5d1     | NCC | FALSE |
| AW822252   | NCC | FALSE |
| 4930549G2  | NCC | FALSE |
| Shroom4    | NCC | FALSE |
| Syt7       | NCC | FALSE |
| Zswim5     | NCC | FALSE |
| Hnf1b      | NCC | TRUE  |
| Stox2      | NCC | FALSE |
| Mark4      | NCC | FALSE |
| Mapk8      | NCC | FALSE |
| Fam134c    | NCC | FALSE |
| Fam126b    | NCC | FALSE |
| Fam110b    | NCC | FALSE |
| Vasn       | NCC | FALSE |
| Mir3091    | NCC | FALSE |
| Zmym6      | NCC | FALSE |
| Mir6904    | NCC | FALSE |
| Smyd3      | NCC | FALSE |
| Fau        | NCC | FALSE |
| Gas2l1     | NCC | FALSE |
| Zfp654     | NCC | TRUE  |
| Zfp708     | NCC | TRUE  |
| Tmem158    | NCC | FALSE |
| Zfp493     | NCC | FALSE |
| Slc3a2     | NCC | FALSE |
| Scmh1      | NCC | TRUE  |
| Map3k6     | NCC | FALSE |
| Slc2a4rg-p | NCC | FALSE |
| Tada2b     | NCC | FALSE |

|           |     |       |
|-----------|-----|-------|
| 643056201 | NCC | FALSE |
| Slx4ip    | NCC | FALSE |
| Rsb1l1    | NCC | FALSE |
| Zfp61     | NCC | TRUE  |
| Prmef8    | NCC | FALSE |
| Pih1d1    | NCC | FALSE |
| Arhgap21  | NCC | FALSE |
| Cables2   | NCC | FALSE |
| Arel1     | NCC | FALSE |
| 1600014C1 | NCC | FALSE |
| Bola1     | NCC | FALSE |
| Bcl7b     | NCC | FALSE |
| Tgfbrap1  | NCC | FALSE |
| Nat9      | NCC | FALSE |
| 301002601 | NCC | FALSE |
| Serhl     | NCC | FALSE |
| Hist1h3i  | NCC | FALSE |
| Lipt1     | NCC | FALSE |
| Hnrnp3    | NCC | TRUE  |
| Msra      | NCC | TRUE  |
| Foxred2   | NCC | FALSE |
| Sbno2     | NCC | FALSE |
| Bcl10     | NCC | FALSE |
| Atg14     | NCC | FALSE |
| Csrnp1    | NCC | FALSE |
| Dgkq      | NCC | FALSE |
| Mtf1      | NCC | TRUE  |
| Mfsd3     | NCC | FALSE |
| Lgalsl    | NCC | FALSE |
| Habp4     | NCC | FALSE |
| Gm9199    | NCC | FALSE |
| Mafg      | NCC | TRUE  |
| Tsacc     | NCC | FALSE |
| Pigg      | NCC | FALSE |
| Bnip3     | NCC | FALSE |
| Mgll      | NCC | FALSE |
| Tex2      | NCC | FALSE |
| Dmwd      | NCC | FALSE |
| Spin2c    | NCC | FALSE |
| E2f2      | NCC | TRUE  |
| Tob2      | NCC | TRUE  |
| Grik1     | NCC | FALSE |
| Bex4      | NCC | FALSE |
| Edn3      | NCC | FALSE |
| Atp7b     | NCC | FALSE |
| Slc25a16  | NCC | FALSE |
| B3gat3    | NCC | FALSE |
| Chd3os    | NCC | FALSE |
| Wwox      | NCC | FALSE |
| Cttnbp2nl | NCC | FALSE |

|           |     |       |
|-----------|-----|-------|
| Zfp11     | NCC | TRUE  |
| Bbs2      | NCC | FALSE |
| Zfp839    | NCC | FALSE |
| Gm14420   | NCC | FALSE |
| E330009J0 | NCC | FALSE |
| Setmar    | NCC | FALSE |
| Eml1      | NCC | FALSE |
| Sp7       | NCC | TRUE  |
| Il12rb2   | NCC | FALSE |
| Snora43   | NCC | FALSE |
| Tmem88    | NCC | FALSE |
| Sos2      | NCC | FALSE |
| Igsf10    | NCC | FALSE |
| Mapk7     | NCC | FALSE |
| Sertad1   | NCC | FALSE |
| Cdkl5     | NCC | FALSE |
| Atxn7l1   | NCC | FALSE |
| Tpm2      | NCC | FALSE |
| Fam160b1  | NCC | FALSE |
| Dis3l2    | NCC | FALSE |
| Socs7     | NCC | FALSE |
| Coa6      | NCC | FALSE |
| Snord34   | NCC | FALSE |
| Gm13152   | NCC | FALSE |
| Nxt2      | NCC | FALSE |
| Dnajc12   | NCC | FALSE |
| Gucy1a2   | NCC | FALSE |
| Dnajb3    | NCC | FALSE |
| Psmg4     | NCC | FALSE |
| Cdx1      | NCC | TRUE  |
| B3gnt7    | NCC | FALSE |
| Dgcr6     | NCC | FALSE |
| Setd3     | NCC | FALSE |
| Gm2027    | NCC | FALSE |
| B130024G1 | NCC | FALSE |
| Hkdc1     | NCC | FALSE |
| BC065397  | NCC | FALSE |
| Tor3a     | NCC | FALSE |
| Fsd1      | NCC | FALSE |
| Gm3414    | NCC | FALSE |
| 4930558J1 | NCC | FALSE |
| Lypla2    | NCC | FALSE |
| E130218I0 | NCC | FALSE |
| D6Wsu163  | NCC | FALSE |
| Hist1h2an | NCC | FALSE |
| Neurl4    | NCC | FALSE |
| Thtpa     | NCC | FALSE |
| Rnf146    | NCC | FALSE |
| Gjb3      | NCC | FALSE |
| Tert      | NCC | FALSE |

|             |     |       |
|-------------|-----|-------|
| BC048507    | NCC | FALSE |
| Nup62-il4i1 | NCC | FALSE |
| Arl1        | NCC | FALSE |
| Pcif1       | NCC | FALSE |
| Ift57       | NCC | FALSE |
| Ceacam1     | NCC | FALSE |
| Rita1       | NCC | FALSE |
| Thns1       | NCC | FALSE |
| Slc25a28    | NCC | FALSE |
| Zfp420      | NCC | TRUE  |
| Zfp775      | NCC | TRUE  |
| Camkmt      | NCC | FALSE |
| Pemt        | NCC | FALSE |
| Aph1a       | NCC | FALSE |
| Papolb      | NCC | FALSE |
| Hyls1       | NCC | FALSE |
| Kif3b       | NCC | FALSE |
| Lmln        | NCC | FALSE |
| Ciart       | NCC | FALSE |
| Gnal        | NCC | FALSE |
| Tmeff1      | NCC | FALSE |
| Zfp862-ps   | NCC | FALSE |
| Efna2       | NCC | FALSE |
| Cmtr1       | NCC | FALSE |
| Snpc3       | NCC | FALSE |
| Lrrc16a     | NCC | FALSE |
| Gchfr       | NCC | FALSE |
| Nabp2       | NCC | FALSE |
| Dhrs11      | NCC | FALSE |
| Snord99     | NCC | FALSE |
| Hoxa11      | NCC | TRUE  |
| Tmem180     | NCC | FALSE |
| Necap1      | NCC | FALSE |
| Plekhb2     | NCC | FALSE |
| Siah2       | NCC | FALSE |
| Snora74a    | NCC | FALSE |
| Slc7a2      | NCC | FALSE |
| Carf        | NCC | TRUE  |
| Acat3       | NCC | FALSE |
| Wdr31       | NCC | FALSE |
| Nxph3       | NCC | TRUE  |
| Ccsap       | NCC | FALSE |
| Tmem144     | NCC | FALSE |
| Cc2d2a      | NCC | FALSE |
| Erc1        | NCC | FALSE |
| Ciao1       | NCC | FALSE |
| Rpl36al     | NCC | FALSE |
| Myo7b       | NCC | FALSE |
| Dguok       | NCC | FALSE |
| Epo         | NCC | FALSE |

|           |     |       |
|-----------|-----|-------|
| Cgn1      | NCC | FALSE |
| Ywhaz     | NCC | TRUE  |
| Zfp354a   | NCC | TRUE  |
| Isoc1     | NCC | FALSE |
| Pcolce2   | NCC | FALSE |
| Lrfn3     | NCC | FALSE |
| Adssl1    | NCC | FALSE |
| Abhd11    | NCC | FALSE |
| Ntmt1     | NCC | FALSE |
| Zbtb6     | NCC | TRUE  |
| Plekh2    | NCC | FALSE |
| Fxr2      | NCC | FALSE |
| Ptpn4     | NCC | FALSE |
| Dnase1    | NCC | FALSE |
| Smarcd2   | NCC | FALSE |
| Cr1l      | NCC | FALSE |
| Srxn1     | NCC | FALSE |
| A530054K1 | NCC | FALSE |
| Polr2l    | NCC | FALSE |
| Scml2     | NCC | FALSE |
| 1110012L1 | NCC | FALSE |
| Ikbke     | NCC | FALSE |
| Hsd17b7   | NCC | FALSE |
| Atg4b     | NCC | FALSE |
| Cdc42ep4  | NCC | FALSE |
| 1110034G2 | NCC | FALSE |
| Snord33   | NCC | FALSE |
| Zfp524    | NCC | TRUE  |
| Inpp5a    | NCC | FALSE |
| Cdk13     | NCC | FALSE |
| Zfp960    | NCC | TRUE  |
| Lrrc4     | NCC | FALSE |
| Mir7038   | NCC | FALSE |
| Snord55   | NCC | FALSE |
| Tmem132c  | NCC | FALSE |
| Gm11110   | NCC | FALSE |
| Efcab6    | NCC | FALSE |
| Lrrc49    | NCC | FALSE |
| Arsk      | NCC | FALSE |
| Zfp229    | NCC | FALSE |
| Adck4     | NCC | FALSE |
| BC022687  | NCC | FALSE |
| Eid2      | NCC | FALSE |
| Wdr78     | NCC | FALSE |
| Ramp2     | NCC | FALSE |
| 9830147E1 | NCC | FALSE |
| Rhbdd1    | NCC | FALSE |
| Gm5523    | NCC | FALSE |
| Auh       | NCC | FALSE |
| Anks3     | NCC | FALSE |

|           |     |       |
|-----------|-----|-------|
| Prkg2     | NCC | FALSE |
| Gal3st3   | NCC | FALSE |
| Eya2      | NCC | FALSE |
| Chrdl1    | NCC | FALSE |
| Hykk      | NCC | FALSE |
| Dusp28    | NCC | FALSE |
| Ankrd45   | NCC | FALSE |
| Stard4    | NCC | FALSE |
| Ptbp2     | NCC | FALSE |
| Hebp2     | NCC | FALSE |
| Cxadr     | NCC | FALSE |
| Nfatc2ip  | NCC | FALSE |
| Ralgapa2  | NCC | FALSE |
| Gm4961    | NCC | FALSE |
| Zscan18   | NCC | TRUE  |
| Tceanc    | NCC | FALSE |
| Usp2      | NCC | FALSE |
| Zfp473    | NCC | FALSE |
| Uxt       | NCC | FALSE |
| Zfp51     | NCC | FALSE |
| Mboat1    | NCC | FALSE |
| Ripk2     | NCC | FALSE |
| Atf7      | NCC | TRUE  |
| Tmem107   | NCC | FALSE |
| Tmem67    | NCC | FALSE |
| Mia3      | NCC | FALSE |
| Vps52     | NCC | FALSE |
| Kdm7a     | NCC | TRUE  |
| Irx5      | NCC | TRUE  |
| Zswim3    | NCC | FALSE |
| Ctps2     | NCC | FALSE |
| Dip2c     | NCC | FALSE |
| Pigw      | NCC | FALSE |
| Ccdc24    | NCC | FALSE |
| 2410018L1 | NCC | FALSE |
| Idi1      | NCC | FALSE |
| Man2b2    | NCC | FALSE |
| Tbcc      | NCC | FALSE |
| Il6st     | NCC | FALSE |
| Sord      | NCC | FALSE |
| Ribc1     | NCC | FALSE |
| Gpatch11  | NCC | FALSE |
| Clcn7     | NCC | FALSE |
| E030030I0 | NCC | FALSE |
| Cdk20     | NCC | FALSE |
| Stx3      | NCC | FALSE |
| Ttc19     | NCC | FALSE |
| Snx7      | NCC | FALSE |
| Snora41   | NCC | FALSE |
| Hapln1    | NCC | FALSE |



|           |     |       |
|-----------|-----|-------|
| B4galt5   | NCC | FALSE |
| Rsg1      | NCC | FALSE |
| Adora1    | NCC | FALSE |
| Zfp846    | NCC | TRUE  |
| Pycard    | NCC | FALSE |
| Pdp2      | NCC | FALSE |
| Srrm2     | NCC | FALSE |
| Gm8363    | NCC | FALSE |
| Dynll2    | NCC | FALSE |
| Tmem181a  | NCC | FALSE |
| Calm2     | NCC | FALSE |
| Fzd9      | NCC | FALSE |
| Spata7    | NCC | FALSE |
| Fbxo10    | NCC | FALSE |
| Tbc1d13   | NCC | FALSE |
| Rnf141    | NCC | FALSE |
| Hemk1     | NCC | FALSE |
| Sh3yl1    | NCC | FALSE |
| Pip4k2b   | NCC | FALSE |
| Mgarp     | NCC | FALSE |
| Iba57     | NCC | FALSE |
| Tfpt      | NCC | FALSE |
| 170001011 | NCC | FALSE |
| Engase    | NCC | FALSE |
| Clasp1    | NCC | FALSE |
| Tekt1     | NCC | FALSE |
| Nadsyn1   | NCC | FALSE |
| Phlpp1    | NCC | FALSE |
| Vti1b     | NCC | FALSE |
| Dhrs7     | NCC | FALSE |
| 1110051M  | NCC | FALSE |
| AF357399  | NCC | FALSE |
| Dpf2      | NCC | FALSE |
| Tst       | NCC | FALSE |
| Lmbrd2    | NCC | FALSE |
| Dnajc14   | NCC | FALSE |
| Fam220a   | NCC | FALSE |
| Rmnd5b    | NCC | FALSE |
| Fchsd2    | NCC | FALSE |
| Phc3      | NCC | FALSE |
| Eldr      | NCC | FALSE |
| Aspg      | NCC | FALSE |
| Bloc1s3   | NCC | FALSE |
| Slc25a47  | NCC | FALSE |
| Lyrn9     | NCC | FALSE |
| Sik3      | NCC | FALSE |
| Zfp59     | NCC | TRUE  |
| Flcn      | NCC | FALSE |
| Pcsk7     | NCC | FALSE |
| Ccdc124   | NCC | FALSE |

|           |     |       |
|-----------|-----|-------|
| 1700094DC | NCC | FALSE |
| Zfp772    | NCC | FALSE |
| Pla2g15   | NCC | FALSE |
| Gstm4     | NCC | FALSE |
| Rabep1    | NCC | FALSE |
| Pdp1      | NCC | FALSE |
| Rnf31     | NCC | FALSE |
| Synj2bp   | NCC | FALSE |
| Kctd18    | NCC | FALSE |
| Sccpdh    | NCC | FALSE |
| Smco4     | NCC | FALSE |
| Sh3bp5l   | NCC | FALSE |
| Sik1      | NCC | FALSE |
| Gm20199   | NCC | FALSE |
| Bbc3      | NCC | FALSE |
| Tcaim     | NCC | FALSE |
| Nr2c2     | NCC | TRUE  |
| Fuca2     | NCC | FALSE |
| Slc25a39  | NCC | FALSE |
| Txndc11   | NCC | FALSE |
| Hspa1a    | NCC | FALSE |
| Degs2     | NCC | FALSE |
| Cdc37l1   | NCC | FALSE |
| Zfp46     | NCC | TRUE  |
| Gm6981    | NCC | FALSE |
| Pdpk1     | NCC | FALSE |
| Katnal2   | NCC | FALSE |
| Hs6st1    | NCC | FALSE |
| Fbxo17    | NCC | FALSE |
| Slc22a5   | NCC | FALSE |
| Airn      | NCC | FALSE |
| Atp6v1a   | NCC | FALSE |
| Rps6ka2   | NCC | FALSE |
| Slu7      | NCC | FALSE |
| Clock     | NCC | TRUE  |
| Gm1976    | NCC | FALSE |
| Slc25a19  | NCC | FALSE |
| Gm3716    | NCC | FALSE |
| Zdbf2     | NCC | FALSE |
| Rab20     | NCC | FALSE |
| Dennd4a   | NCC | FALSE |
| 6330408AC | NCC | FALSE |
| Slc25a51  | NCC | FALSE |
| Nsun3     | NCC | FALSE |
| Acbd6     | NCC | FALSE |
| Slc39a11  | NCC | FALSE |
| St7       | NCC | FALSE |
| Cdc42bpa  | NCC | FALSE |
| Aff1      | NCC | FALSE |
| Isca1     | NCC | FALSE |

|           |     |       |
|-----------|-----|-------|
| Nosip     | NCC | FALSE |
| Pip5k1c   | NCC | FALSE |
| Mkl1      | NCC | FALSE |
| Pou3f2    | NCC | TRUE  |
| Tcf15     | NCC | TRUE  |
| Fxyd6     | NCC | FALSE |
| Atxn7l2   | NCC | FALSE |
| Irf2bp2   | NCC | FALSE |
| AA987161  | NCC | FALSE |
| Pex1      | NCC | FALSE |
| Fars2     | NCC | FALSE |
| Ankrd42   | NCC | FALSE |
| Cgrrf1    | NCC | FALSE |
| Coch      | NCC | FALSE |
| Cacna1a   | NCC | FALSE |
| Gcc1      | NCC | FALSE |
| Btbd10    | NCC | FALSE |
| Hist1h3c  | NCC | FALSE |
| Rundc1    | NCC | FALSE |
| Arf1      | NCC | FALSE |
| Cited4    | NCC | FALSE |
| Tmem59l   | NCC | FALSE |
| Setd4     | NCC | FALSE |
| 4930478L0 | NCC | FALSE |
| 4933417G0 | NCC | FALSE |
| Ago3      | NCC | FALSE |
| Pex11a    | NCC | FALSE |
| Grk5      | NCC | FALSE |
| Elof1     | NCC | FALSE |
| Zbtb12    | NCC | TRUE  |
| Coq7      | NCC | FALSE |
| Car3      | NCC | FALSE |
| Nfrkb     | NCC | FALSE |
| Ppm1a     | NCC | FALSE |
| 91300190z | NCC | TRUE  |
| Kif4-ps   | NCC | FALSE |
| Zfp790    | NCC | TRUE  |
| Snopc5    | NCC | TRUE  |
| Zcchc7    | NCC | FALSE |
| Crif1     | NCC | FALSE |
| Slc35d2   | NCC | FALSE |
| Armc7     | NCC | FALSE |
| Zkscan6   | NCC | TRUE  |
| Chn1      | NCC | FALSE |
| Fkbp15    | NCC | FALSE |
| Napg      | NCC | FALSE |
| Unc5d     | NCC | FALSE |
| Nipal4    | NCC | FALSE |
| Ift46     | NCC | FALSE |
| Mylk      | NCC | TRUE  |

|           |     |       |
|-----------|-----|-------|
| Tcf15     | NCC | TRUE  |
| Tmem127   | NCC | FALSE |
| Dact1     | NCC | FALSE |
| Chmp7     | NCC | FALSE |
| Blcap     | NCC | FALSE |
| Pm20d1    | NCC | FALSE |
| Kif16b    | NCC | FALSE |
| Cradd     | NCC | FALSE |
| Hexim2    | NCC | FALSE |
| Cetn2     | NCC | FALSE |
| Rps13     | NCC | FALSE |
| Cisd1     | NCC | FALSE |
| A230073K1 | NCC | FALSE |
| Guca1a    | NCC | FALSE |
| Fam181a   | NCC | FALSE |
| Zfp607    | NCC | FALSE |
| Tmem41b   | NCC | FALSE |
| Gstm2     | NCC | FALSE |
| Zfp120    | NCC | TRUE  |
| Satb1     | NCC | TRUE  |
| Rwdd3     | NCC | FALSE |
| Lrif1     | NCC | FALSE |
| Pih1d2    | NCC | FALSE |
| Coq10b    | NCC | FALSE |
| Mamdc4    | NCC | FALSE |
| Coro7     | NCC | FALSE |
| Fhl1      | NCC | FALSE |
| Emc2      | NCC | FALSE |
| Zdhhc21   | NCC | FALSE |
| AW146154  | NCC | TRUE  |
| D330050I1 | NCC | FALSE |
| Slc16a4   | NCC | FALSE |
| Mterfd3   | NCC | FALSE |
| Mgat4b    | NCC | FALSE |
| Tnfrsf10b | NCC | FALSE |
| Prrg1     | NCC | FALSE |
| Nudt15    | NCC | FALSE |
| Rbfa      | NCC | FALSE |
| Rcan1     | NCC | FALSE |
| Atf6      | NCC | TRUE  |
| Zfp711    | NCC | TRUE  |
| E330033B0 | NCC | FALSE |
| Tmem167t  | NCC | FALSE |
| C1ql2     | NCC | FALSE |
| Gm10389   | NCC | FALSE |
| Dph6      | NCC | FALSE |
| Oxld1     | NCC | FALSE |
| Tmem170   | NCC | FALSE |
| Pnp2      | NCC | FALSE |
| Rasl12    | NCC | FALSE |

|           |     |       |
|-----------|-----|-------|
| Vta1      | NCC | FALSE |
| Ifitm1    | NCC | FALSE |
| C03003412 | NCC | FALSE |
| Ift22     | NCC | FALSE |
| Lpl       | NCC | FALSE |
| Zfp82     | NCC | TRUE  |
| Slc2a3    | NCC | FALSE |
| Galnt18   | NCC | FALSE |
| St3gal3   | NCC | FALSE |
| Arhgap8   | NCC | FALSE |
| Naif1     | NCC | FALSE |
| Sult2b1   | NCC | FALSE |
| Zfp715    | NCC | FALSE |
| Lrrc75a   | NCC | FALSE |
| Dfna5     | NCC | FALSE |
| Gm5069    | NCC | FALSE |
| Ccdc96    | NCC | FALSE |
| Tmem222   | NCC | FALSE |
| Elmod3    | NCC | FALSE |
| Pdlim2    | NCC | FALSE |
| Slc36a2   | NCC | FALSE |
| Braf      | NCC | FALSE |
| Snord57   | NCC | FALSE |
| Gm15708   | NCC | FALSE |
| Klhdc3    | NCC | FALSE |
| Wdr41     | NCC | FALSE |
| Tha1      | NCC | FALSE |
| Arid4a    | NCC | FALSE |
| Dnah17    | NCC | FALSE |
| Anxa3     | NCC | FALSE |
| Eva1b     | NCC | FALSE |
| Tgfbr3    | NCC | FALSE |
| Necab2    | NCC | FALSE |
| Snord95   | NCC | FALSE |
| Mfsd2a    | NCC | FALSE |
| Fbxw4     | NCC | FALSE |
| Snhg10    | NCC | FALSE |
| Rnf214    | NCC | FALSE |
| Pten      | NCC | FALSE |
| Pax6      | NCC | TRUE  |
| 4930452BC | NCC | FALSE |
| A930005H  | NCC | FALSE |
| Slc26a6   | NCC | FALSE |
| 4921531C2 | NCC | FALSE |
| Fam19a4   | NCC | FALSE |
| Grifin    | NCC | FALSE |
| Pcnxl4    | NCC | FALSE |
| Atxn7     | NCC | FALSE |
| Timp1     | NCC | FALSE |
| Pknox1    | NCC | TRUE  |

|           |     |       |
|-----------|-----|-------|
| Sowaha    | NCC | FALSE |
| Raet1a    | NCC | FALSE |
| Snord2    | NCC | FALSE |
| Ovgp1     | NCC | FALSE |
| Sc5d      | NCC | FALSE |
| Rerg      | NCC | FALSE |
| Tenc1     | NCC | FALSE |
| Eme2      | NCC | FALSE |
| Atp6v1c1  | NCC | FALSE |
| Gm4890    | NCC | FALSE |
| Fam45a    | NCC | FALSE |
| Kcng1     | NCC | FALSE |
| Mrpl43    | NCC | FALSE |
| Akap7     | NCC | FALSE |
| Esrp1     | NCC | TRUE  |
| F11r      | NCC | FALSE |
| Gin1      | NCC | FALSE |
| Ndrp3     | NCC | FALSE |
| Gm14305   | NCC | TRUE  |
| Bola2     | NCC | FALSE |
| Zfp619    | NCC | FALSE |
| Usp30     | NCC | FALSE |
| BC017643  | NCC | FALSE |
| Gm16523   | NCC | FALSE |
| Ift81     | NCC | FALSE |
| Mir3076   | NCC | FALSE |
| Lcorl     | NCC | TRUE  |
| Imp2l     | NCC | FALSE |
| Akap17b   | NCC | FALSE |
| Wnt5a     | NCC | FALSE |
| Leng1     | NCC | FALSE |
| Asl       | NCC | FALSE |
| Cep83os   | NCC | FALSE |
| Gnptab    | NCC | FALSE |
| Fam129c   | NCC | FALSE |
| Ranbp17   | NCC | FALSE |
| Bmper     | NCC | FALSE |
| Akr1c12   | NCC | FALSE |
| Gm20939   | NCC | TRUE  |
| A230056P1 | NCC | FALSE |
| A830082N  | NCC | FALSE |
| Rps4l     | NCC | FALSE |
| Mtmt3     | NCC | FALSE |
| Sdc2      | NCC | FALSE |
| E030024N  | NCC | FALSE |
| Sprtn     | NCC | FALSE |
| C130046K2 | NCC | FALSE |
| Vapa      | NCC | FALSE |
| Col4a3bp  | NCC | FALSE |
| 1500015A  | NCC | FALSE |

|           |     |       |
|-----------|-----|-------|
| Iqgap2    | NCC | FALSE |
| Slx1b     | NCC | FALSE |
| Lekr1     | NCC | FALSE |
| Msx1      | NCC | TRUE  |
| Slc25a25  | NCC | FALSE |
| Orai3     | NCC | FALSE |
| Ttl       | NCC | FALSE |
| 2410004I0 | NCC | FALSE |
| Snord19   | NCC | FALSE |
| Nt5m      | NCC | FALSE |
| Nfkbie    | NCC | FALSE |
| Ocr1      | NCC | FALSE |
| Parvb     | NCC | FALSE |
| Gm9958    | NCC | FALSE |
| Usp13     | NCC | FALSE |
| Rtfdc1    | NCC | FALSE |
| Wdr59     | NCC | FALSE |
| Dach2     | NCC | FALSE |
| Hint3     | NCC | FALSE |
| 1300002E1 | NCC | FALSE |
| Gpr19     | NCC | FALSE |
| Lsm7      | NCC | FALSE |
| Mfhas1    | NCC | FALSE |
| Ccdc186   | NCC | FALSE |
| Hoxd12    | NCC | TRUE  |
| Cenpv     | NCC | FALSE |
| Dync1li1  | NCC | FALSE |
| 2510003E0 | NCC | FALSE |
| Epn2      | NCC | FALSE |
| Rdm1      | NCC | FALSE |
| Rragb     | NCC | FALSE |
| Rbks      | NCC | FALSE |
| Sdr39u1   | NCC | FALSE |
| Bicd2     | NCC | FALSE |
| Samd8     | NCC | FALSE |
| Lonrf1    | NCC | FALSE |
| Yif1b     | NCC | FALSE |
| Appl2     | NCC | FALSE |
| Tbc1d10b  | NCC | FALSE |
| Pced1b    | NCC | FALSE |
| Gm5124    | NCC | FALSE |
| Grasp     | NCC | FALSE |
| Ccdc120   | NCC | FALSE |
| D1Pas1    | NCC | FALSE |
| Zbtb3     | NCC | TRUE  |
| Tle1      | NCC | FALSE |
| Ikzf4     | NCC | TRUE  |
| 5730507CC | NCC | TRUE  |
| Stap2     | NCC | FALSE |
| Slc6a9    | NCC | FALSE |

|           |     |       |
|-----------|-----|-------|
| Trex1     | NCC | FALSE |
| Zfp605    | NCC | FALSE |
| Klhl29    | NCC | FALSE |
| Trabd2b   | NCC | FALSE |
| Agbl5     | NCC | FALSE |
| Glrbl     | NCC | FALSE |
| 6820431F2 | NCC | FALSE |
| Abcd4     | NCC | FALSE |
| Add3      | NCC | FALSE |
| Fbxw2     | NCC | FALSE |
| Zbtb37    | NCC | TRUE  |
| Bdh1      | NCC | FALSE |
| Cmb1      | NCC | FALSE |
| Masp2     | NCC | FALSE |
| Hoxc12    | NCC | TRUE  |
| Mycl      | NCC | TRUE  |
| 9230105E0 | NCC | FALSE |
| Nptx2     | NCC | FALSE |
| Espn      | NCC | FALSE |
| AU041133  | NCC | TRUE  |
| Zfp119a   | NCC | TRUE  |
| Rpia      | NCC | FALSE |
| 2310035C2 | NCC | FALSE |
| Rnd1      | NCC | FALSE |
| Zfp953    | NCC | FALSE |
| BC033916  | NCC | FALSE |
| Snora52   | NCC | FALSE |
| Amigo2    | NCC | FALSE |
| Fam120b   | NCC | FALSE |
| Fam193b   | NCC | FALSE |
| Zfp931    | NCC | TRUE  |
| Arntl2    | NCC | TRUE  |
| Serac1    | NCC | FALSE |
| 9330151L1 | NCC | FALSE |
| Dnajc16   | NCC | FALSE |
| Zfp526    | NCC | TRUE  |
| Itga8     | NCC | FALSE |
| Mss51     | NCC | FALSE |
| Rgs10     | NCC | FALSE |
| Rnf181    | NCC | FALSE |
| Grb2      | NCC | FALSE |
| Ncdn      | NCC | FALSE |
| Galns     | NCC | FALSE |
| Hotair    | NCC | FALSE |
| Zfp324    | NCC | TRUE  |
| Hist1h2bm | NCC | FALSE |
| Hoxa11os  | NCC | FALSE |
| Trim45    | NCC | FALSE |
| Zfa-ps    | NCC | TRUE  |
| Doc2g     | NCC | FALSE |



|           |     |       |
|-----------|-----|-------|
| Myb       | NCC | TRUE  |
| Cntfr     | NCC | FALSE |
| Fam63a    | NCC | FALSE |
| Dync2li1  | NCC | FALSE |
| Pop7      | NCC | FALSE |
| Aurkaip1  | NCC | FALSE |
| D130020LC | NCC | FALSE |
| Fam120c   | NCC | FALSE |
| D2hgdh    | NCC | FALSE |
| Rere      | NCC | FALSE |
| Nat2      | NCC | FALSE |
| Gtf2a2    | NCC | TRUE  |
| B130034C1 | NCC | FALSE |
| Tmem143   | NCC | FALSE |
| Dusp14    | NCC | FALSE |
| Nr2c2ap   | NCC | FALSE |
| Magee2    | NCC | FALSE |
| lqcg      | NCC | FALSE |
| Gm16039   | NCC | FALSE |
| C130036L2 | NCC | FALSE |
| Slc35a5   | NCC | FALSE |
| Raver2    | NCC | FALSE |
| Ttc17     | NCC | FALSE |
| Prg4      | NCC | FALSE |
| Uap111    | NCC | FALSE |
| Fbxo27    | NCC | FALSE |
| Tpk1      | NCC | FALSE |
| Lmbr1     | NCC | FALSE |
| Cdyl2     | NCC | FALSE |
| Mir7003   | NCC | FALSE |
| Arhgef18  | NCC | FALSE |
| Ppp1r26   | NCC | FALSE |
| Fam69c    | NCC | FALSE |
| Gm5177    | NCC | FALSE |
| Alpk1     | NCC | FALSE |
| Spag1     | NCC | FALSE |
| Ccdc85b   | NCC | FALSE |
| Rdh11     | NCC | FALSE |
| Cox5a     | NCC | FALSE |
| Tmem87b   | NCC | FALSE |
| Tbc1d24   | NCC | FALSE |
| Adcy3     | NCC | FALSE |
| Gm3604    | NCC | TRUE  |
| Cldn14    | NCC | FALSE |
| Gm15706   | NCC | FALSE |
| Ptdss1    | NCC | FALSE |
| Zfp658    | NCC | FALSE |
| Hist4h4   | NCC | FALSE |
| Pcsk1     | NCC | FALSE |
| Rdh12     | NCC | FALSE |

|          |     |       |
|----------|-----|-------|
| Trip11   | NCC | FALSE |
| Fancd2os | NCC | FALSE |
| Plekhm1  | NCC | FALSE |
| Ubxn2a   | NCC | FALSE |
| Zxda     | NCC | FALSE |
| Omd      | NCC | FALSE |
| Pfdn2    | NCC | FALSE |
| Zfp94    | NCC | TRUE  |
| Gm14295  | NCC | TRUE  |
| Mpp2     | NCC | FALSE |
| Zic5     | NCC | TRUE  |
| Gm20324  | NCC | FALSE |
| Mrps18c  | NCC | FALSE |
| Flad1    | NCC | FALSE |
| Mir19b-1 | NCC | FALSE |
| 2200002D | NCC | FALSE |
| Zbtb42   | NCC | TRUE  |
| Ctf1     | NCC | FALSE |
| Snord45b | NCC | FALSE |
| Gm10364  | NCC | FALSE |
| Smim19   | NCC | FALSE |
| Pxylp1   | NCC | FALSE |
| Tbc1d17  | NCC | FALSE |
| Slc25a53 | NCC | FALSE |
| Mcts1    | NCC | FALSE |
| Hist1h3g | NCC | FALSE |
| Nudt12   | NCC | FALSE |
| Nrg4     | NCC | FALSE |
| Cd83     | NCC | FALSE |
| Fam160b2 | NCC | FALSE |
| Eepd1    | NCC | FALSE |
| Ring1    | NCC | FALSE |
| Mfap1b   | NCC | FALSE |
| B130006D | NCC | FALSE |
| Tmem184c | NCC | FALSE |
| Lysmd4   | NCC | FALSE |
| Elk4     | NCC | TRUE  |
| Hdhd3    | NCC | FALSE |
| Rab10os  | NCC | FALSE |
| Zcchc14  | NCC | TRUE  |
| Bicc1    | NCC | FALSE |
| Zkscan4  | NCC | TRUE  |
| Fam132b  | NCC | FALSE |
| Mxd3     | NCC | TRUE  |
| Fn3krp   | NCC | FALSE |
| St3gal5  | NCC | FALSE |
| Fads1    | NCC | FALSE |
| Spag17   | NCC | FALSE |
| Mir363   | NCC | FALSE |
| 3200001D | NCC | FALSE |

|            |     |       |
|------------|-----|-------|
| 4930507D   | NCC | FALSE |
| Ncf2       | NCC | FALSE |
| Zcchc2     | NCC | FALSE |
| Dpp4       | NCC | FALSE |
| Cdadc1     | NCC | FALSE |
| Atg4d      | NCC | FALSE |
| Atg2a      | NCC | FALSE |
| Osbpl3     | NCC | FALSE |
| Zfp688     | NCC | TRUE  |
| 9530027J0  | NCC | FALSE |
| Nxpe4      | NCC | FALSE |
| Mterf1a    | NCC | TRUE  |
| Rnf19b     | NCC | FALSE |
| Cers6      | NCC | TRUE  |
| Ecscr      | NCC | FALSE |
| Kis2       | NCC | FALSE |
| Enox2      | NCC | FALSE |
| Tbce       | NCC | FALSE |
| Dock9      | NCC | FALSE |
| Gm12992    | NCC | FALSE |
| Hgs        | NCC | FALSE |
| AV051173   | NCC | FALSE |
| Akap11     | NCC | FALSE |
| Hist1h3f   | NCC | FALSE |
| Prr22      | NCC | FALSE |
| Gm14403    | NCC | TRUE  |
| Snx30      | NCC | FALSE |
| Zfp369     | NCC | TRUE  |
| Snord49b   | NCC | FALSE |
| Snap29     | NCC | FALSE |
| Ccdc125    | NCC | FALSE |
| Lmbrd1     | NCC | FALSE |
| Kat5       | NCC | FALSE |
| Fbxo36     | NCC | FALSE |
| Vps39      | NCC | FALSE |
| B230208H1  | NCC | FALSE |
| Fgf15      | NCC | TRUE  |
| Asphd2     | NCC | FALSE |
| Casq2      | NCC | FALSE |
| Itgae      | NCC | FALSE |
| Ubn2       | NCC | FALSE |
| Alyref2    | NCC | FALSE |
| Rab43      | NCC | FALSE |
| Ube2e2     | NCC | FALSE |
| Napepld    | NCC | FALSE |
| Nog        | NCC | FALSE |
| Gm16982    | NCC | FALSE |
| Gt(ROSA)2f | NCC | FALSE |
| Ccdc114    | NCC | FALSE |
| 3110043O   | NCC | FALSE |

|           |     |       |
|-----------|-----|-------|
| Camk2g    | NCC | FALSE |
| Unc13d    | NCC | FALSE |
| BC006965  | NCC | FALSE |
| Arhgef1   | NCC | FALSE |
| Map2k3os  | NCC | FALSE |
| Smoc1     | NCC | FALSE |
| Mok       | NCC | FALSE |
| Ccdc130   | NCC | FALSE |
| Gpr137    | NCC | FALSE |
| Zc3h12b   | NCC | FALSE |
| Zfand4    | NCC | FALSE |
| Vps37c    | NCC | FALSE |
| Sparcl1   | NCC | FALSE |
| Zxdc      | NCC | TRUE  |
| Per3      | NCC | FALSE |
| Fsbp      | NCC | FALSE |
| Qdpr      | NCC | FALSE |
| Galnt11   | NCC | FALSE |
| Zfp119b   | NCC | TRUE  |
| Pin1rt1   | NCC | FALSE |
| Rab8a     | NCC | FALSE |
| Il18bp    | NCC | FALSE |
| Hist1h2bb | NCC | FALSE |
| Neu3      | NCC | FALSE |
| Snora17   | NCC | FALSE |
| Zfp438    | NCC | TRUE  |
| Degs1     | NCC | FALSE |
| Gm13212   | NCC | TRUE  |
| 5730480H  | NCC | FALSE |
| Prrg3     | NCC | FALSE |
| Rps6ka4   | NCC | FALSE |
| Anxa9     | NCC | FALSE |
| Ogfrl1    | NCC | FALSE |
| Zic2      | NCC | TRUE  |
| Slc36a4   | NCC | FALSE |
| Zfyve9    | NCC | FALSE |
| Hoxc11    | NCC | TRUE  |
| Tmub1     | NCC | FALSE |
| Snord83b  | NCC | FALSE |
| Myd88     | NCC | FALSE |
| Nkx3-1    | NCC | TRUE  |
| Nipsnap1  | NCC | FALSE |
| Gnat2     | NCC | FALSE |
| Slc25a48  | NCC | FALSE |
| 6330418K  | NCC | FALSE |
| Lrrc14b   | NCC | FALSE |
| Dcaf5     | NCC | FALSE |
| D330045A  | NCC | FALSE |
| Tmc7      | NCC | FALSE |
| Slc39a6   | NCC | FALSE |

|           |     |       |
|-----------|-----|-------|
| Zxdb      | NCC | TRUE  |
| C330021F2 | NCC | FALSE |
| Hist1h2bk | NCC | FALSE |
| Timm17a   | NCC | FALSE |
| Gna14     | NCC | FALSE |
| Eea1      | NCC | FALSE |
| Wdtdc1    | NCC | FALSE |
| Hist1h3e  | NCC | FALSE |
| Gabra4    | NCC | FALSE |
| Nkapl     | NCC | FALSE |
| Map6d1    | NCC | FALSE |
| Efcc1     | NCC | FALSE |
| Malt1     | NCC | FALSE |
| B3gnt1    | NCC | FALSE |
| Sbds      | NCC | FALSE |
| Slc25a29  | NCC | FALSE |
| Esco1     | NCC | FALSE |
| AU040320  | NCC | FALSE |
| Ganc      | NCC | FALSE |
| Slc9b2    | NCC | FALSE |
| Mvk       | NCC | FALSE |
| Pdcl3     | NCC | FALSE |
| Foxd2     | NCC | TRUE  |
| 9430091E2 | NCC | FALSE |
| Adam15    | NCC | FALSE |
| Tdg       | NCC | FALSE |
| 2610524H  | NCC | FALSE |
| Ankrd37   | NCC | FALSE |
| Lypd6     | NCC | FALSE |
| Khdrbs3   | NCC | FALSE |
| Rpl28     | NCC | FALSE |
| Naaladl1  | NCC | FALSE |
| Lym1      | NCC | FALSE |
| Lingo3    | NCC | FALSE |
| Gm7120    | NCC | FALSE |
| 1110054M  | NCC | FALSE |
| Gpr63     | NCC | FALSE |
| Kcnk1     | NCC | FALSE |
| Arl4c     | NCC | FALSE |
| Plch1     | NCC | FALSE |
| Tspyl5    | NCC | FALSE |
| E430018J2 | NCC | TRUE  |
| Gm10653   | NCC | FALSE |
| Zfp97     | NCC | TRUE  |
| Hfe2      | NCC | FALSE |
| Nell2     | Hub | FALSE |
| Cdkn1c    | Hub | FALSE |
| Dlx1      | Hub | TRUE  |
| Rbp1      | Hub | FALSE |
| Slitrk6   | Hub | FALSE |

|           |     |       |
|-----------|-----|-------|
| Cthrc1    | Hub | FALSE |
| Ldhb      | Hub | FALSE |
| Tgfb2     | Hub | FALSE |
| S100a16   | Hub | FALSE |
| Serpine2  | Hub | FALSE |
| Celf2     | Hub | FALSE |
| Wwtr1     | Hub | FALSE |
| Dpysl3    | Hub | FALSE |
| Cdh10     | Hub | FALSE |
| Ckb       | Hub | FALSE |
| Col5a2    | Hub | FALSE |
| Cacna1h   | Hub | FALSE |
| Kif21a    | Hub | FALSE |
| Tmem98    | Hub | FALSE |
| Irf6      | Hub | TRUE  |
| Pgpep1    | Hub | FALSE |
| Anxa6     | Hub | FALSE |
| Fabp7     | Hub | FALSE |
| Ascl1     | Hub | TRUE  |
| Mmp14     | Hub | FALSE |
| Fbln1     | Hub | FALSE |
| Sorcs1    | Hub | FALSE |
| Kctd12    | Hub | FALSE |
| Samd5     | Hub | FALSE |
| Cyp2j6    | Hub | FALSE |
| E130114P1 | Hub | FALSE |
| Lgals1    | Hub | FALSE |
| Lipa      | Hub | FALSE |
| Anxa5     | Hub | FALSE |
| Adam23    | Hub | FALSE |
| Adamts7   | Hub | FALSE |
| Rhoc      | Hub | FALSE |
| Ptprm     | Hub | FALSE |
| Tbx2      | Hub | TRUE  |
| Chst5     | Hub | FALSE |
| Gpr126    | Hub | FALSE |
| Lama4     | Hub | FALSE |
| Dclk1     | Hub | FALSE |
| Pxdc1     | Hub | FALSE |
| Pdcd4     | Hub | FALSE |
| Sh3pxd2a  | Hub | FALSE |
| Sash1     | Hub | FALSE |
| Rps18     | Hub | FALSE |
| S100a11   | Hub | FALSE |
| Cdh19     | Hub | FALSE |
| Maged2    | Hub | FALSE |
| Mfap2     | Hub | FALSE |
| Rps26     | Hub | FALSE |
| Ankrd50   | Hub | FALSE |
| Aldh2     | Hub | FALSE |

|          |     |       |
|----------|-----|-------|
| Daam2    | Hub | FALSE |
| Reck     | Hub | FALSE |
| Mpzl1    | Hub | FALSE |
| Mab21l1  | Hub | FALSE |
| Mov10    | Hub | FALSE |
| Atp10b   | Hub | FALSE |
| Zfp536   | Hub | TRUE  |
| Srpk2    | Hub | FALSE |
| Sox2ot   | Hub | FALSE |
| Ccnd1    | Hub | FALSE |
| Klhl30   | Hub | FALSE |
| Aes      | Hub | FALSE |
| Gas7     | Hub | FALSE |
| Itgav    | Hub | FALSE |
| Ptprz1   | Hub | FALSE |
| Ssbp4    | Hub | FALSE |
| Prss12   | Hub | FALSE |
| Phox2b   | Hub | TRUE  |
| Postn    | Hub | FALSE |
| Aldh1a3  | Hub | FALSE |
| Ywhab    | Hub | FALSE |
| Ctsl     | Hub | FALSE |
| Sparc    | Hub | FALSE |
| Slc39a1  | Hub | FALSE |
| Spry2    | Hub | FALSE |
| Tcirg1   | Hub | FALSE |
| Mcam     | Hub | FALSE |
| Grik2    | Hub | FALSE |
| Dlx1as   | Hub | FALSE |
| Atat1    | Hub | FALSE |
| Rpl39    | Hub | FALSE |
| Foxo1    | Hub | TRUE  |
| Csrp1    | Hub | FALSE |
| Rpl13a   | Hub | FALSE |
| Zdhhc2   | Hub | FALSE |
| Gng11    | Hub | FALSE |
| Sort1    | Hub | FALSE |
| Scrg1    | Hub | FALSE |
| Rpl32    | Hub | FALSE |
| Rps19    | Hub | FALSE |
| Tmtc2    | Hub | FALSE |
| Oxct1    | Hub | FALSE |
| Fam184b  | Hub | FALSE |
| 1700025G | Hub | FALSE |
| Tcf4     | Hub | TRUE  |
| Ypel2    | Hub | FALSE |
| Mvb12b   | Hub | FALSE |
| Agrn     | Hub | FALSE |
| Gpr124   | Hub | FALSE |
| Fam173a  | Hub | FALSE |

|            |     |       |
|------------|-----|-------|
| Ccdc8      | Hub | FALSE |
| Fuca1      | Hub | FALSE |
| Epha7      | Hub | FALSE |
| Shfm1      | Hub | FALSE |
| Gnai2      | Hub | FALSE |
| Ddr1       | Hub | FALSE |
| Rnaseh2c   | Hub | TRUE  |
| Epb4.1l3   | Hub | FALSE |
| Rps14      | Hub | FALSE |
| Shc4       | Hub | FALSE |
| Pdpf       | Hub | FALSE |
| Nid1       | Hub | FALSE |
| Fam198b    | Hub | FALSE |
| Celsr2     | Hub | FALSE |
| Marcks     | Hub | FALSE |
| Akr1a1     | Hub | TRUE  |
| Col9a3     | Hub | FALSE |
| Rps24      | Hub | FALSE |
| Endod1     | Hub | FALSE |
| Megf9      | Hub | FALSE |
| Esyt1      | Hub | FALSE |
| Ajap1      | Hub | FALSE |
| Eid1       | Hub | FALSE |
| Cadps      | Hub | FALSE |
| Pde9a      | Hub | FALSE |
| Fibin      | Hub | FALSE |
| Arhgap23   | Hub | FALSE |
| Pard3b     | Hub | FALSE |
| Msn        | Hub | FALSE |
| Mmp15      | Hub | FALSE |
| Ndst3      | Hub | FALSE |
| Fstl1      | Hub | FALSE |
| Ppib       | Hub | FALSE |
| Col9a2     | Hub | FALSE |
| Itm2c      | Hub | FALSE |
| Eif3f      | Hub | FALSE |
| Hdac9      | Hub | FALSE |
| Ctnnal1    | Hub | FALSE |
| Rpl37a     | Hub | FALSE |
| Myo18a     | Hub | FALSE |
| Acss1      | Hub | FALSE |
| Rps7       | Hub | FALSE |
| Tpt1       | Hub | FALSE |
| Tspan7     | Hub | FALSE |
| Ppp1r9a    | Hub | FALSE |
| Dzip1      | Hub | FALSE |
| Fbxo7      | Hub | FALSE |
| Rps15a-ps4 | Hub | FALSE |
| Slit3      | Hub | FALSE |
| Akap12     | Hub | FALSE |



|           |     |       |
|-----------|-----|-------|
| Rpl18a    | Hub | FALSE |
| Myh14     | Hub | FALSE |
| Oaz2      | Hub | FALSE |
| Rftn2     | Hub | FALSE |
| Ndfip1    | Hub | FALSE |
| Ptprj     | Hub | FALSE |
| Rbms3     | Hub | FALSE |
| Tia1      | Hub | TRUE  |
| Crem      | Hub | TRUE  |
| Luzp2     | Hub | TRUE  |
| Etfa      | Hub | FALSE |
| Wipi1     | Hub | FALSE |
| Sh3glb1   | Hub | FALSE |
| Cox7a2l   | Hub | FALSE |
| Pfdn1     | Hub | FALSE |
| Plekhg1   | Hub | FALSE |
| Trp53inp1 | Hub | FALSE |
| Cst3      | Hub | FALSE |
| Ube2h     | Hub | FALSE |
| Gpx7      | Hub | FALSE |
| Olfm2     | Hub | FALSE |
| Trappc1   | Hub | FALSE |
| Fez1      | Hub | TRUE  |
| Hmgn3     | Hub | TRUE  |
| Plekha5   | Hub | FALSE |
| Padi2     | Hub | FALSE |
| Sox4      | Hub | TRUE  |
| Tspan3    | Hub | FALSE |
| Wbp5      | Hub | FALSE |
| Prdx2     | Hub | FALSE |
| St6gal1   | Hub | FALSE |
| H2afv     | Hub | FALSE |
| Pbxip1    | Hub | FALSE |
| Efna5     | Hub | FALSE |
| C1ql1     | Hub | FALSE |
| Id4       | Hub | TRUE  |
| Tax1bp3   | Hub | FALSE |
| Kdm4a     | Hub | TRUE  |
| Ctsb      | Hub | FALSE |
| Stk10     | Hub | FALSE |
| Pde7b     | Hub | FALSE |
| Ilk       | Hub | FALSE |
| Hmg20b    | Hub | TRUE  |
| Vamp8     | Hub | FALSE |
| Axl       | Hub | FALSE |
| Deptor    | Hub | FALSE |
| Ddit4     | Hub | FALSE |
| Col20a1   | Hub | FALSE |
| Il1rap    | Hub | FALSE |
| Sgce      | Hub | FALSE |

|           |     |       |
|-----------|-----|-------|
| Btg1      | Hub | FALSE |
| Hmgn2     | Hub | FALSE |
| Dennd2a   | Hub | FALSE |
| Itgb1     | Hub | FALSE |
| Gpm6b     | Hub | FALSE |
| Atrx      | Hub | FALSE |
| Cald1     | Hub | FALSE |
| Trf       | Hub | FALSE |
| Capg      | Hub | FALSE |
| Grik3     | Hub | FALSE |
| Twsg1     | Hub | FALSE |
| Chl1      | Hub | FALSE |
| Tox2      | Hub | FALSE |
| Nlgn2     | Hub | FALSE |
| Rpl13     | Hub | FALSE |
| Ltbr      | Hub | FALSE |
| Ndufa3    | Hub | FALSE |
| Gbas      | Hub | FALSE |
| Laptm4b   | Hub | FALSE |
| 2700060E0 | Hub | FALSE |
| Slc35f1   | Hub | FALSE |
| Rps28     | Hub | FALSE |
| Lgmn      | Hub | FALSE |
| Rgs16     | Hub | FALSE |
| Plxnd1    | Hub | FALSE |
| Hadhb     | Hub | FALSE |
| Afap1l2   | Hub | FALSE |
| Ahr       | Hub | TRUE  |
| Camk1     | Hub | FALSE |
| Gm13826   | Hub | FALSE |
| Cd276     | Hub | FALSE |
| Egfl8     | Hub | FALSE |
| Plgrkt    | Hub | FALSE |
| Phlda3    | Hub | FALSE |
| Gsk3b     | Hub | FALSE |
| Srgap1    | Hub | FALSE |
| Rps15     | Hub | FALSE |
| Map2      | Hub | FALSE |
| Hbp1      | Hub | TRUE  |
| Atp1b2    | Hub | FALSE |
| Bmp1      | Hub | FALSE |
| Eci2      | Hub | FALSE |
| Haghl     | Hub | FALSE |
| Erf       | Hub | TRUE  |
| Slc44a1   | Hub | FALSE |
| 0610031J0 | Hub | FALSE |
| Sema3c    | Hub | FALSE |
| Sema4c    | Hub | FALSE |
| Gria3     | Hub | FALSE |
| Surf4     | Hub | FALSE |

|           |     |       |
|-----------|-----|-------|
| Akap2     | Hub | FALSE |
| Clic1     | Hub | FALSE |
| AW549542  | Hub | FALSE |
| Il1rapl1  | Hub | FALSE |
| Adamts5   | Hub | FALSE |
| Epb4.1l4a | Hub | FALSE |
| Arl2bp    | Hub | FALSE |
| Pcdh7     | Hub | FALSE |
| Acot13    | Hub | FALSE |
| Cep170    | Hub | FALSE |
| Arid5b    | Hub | TRUE  |
| Fdx1      | Hub | FALSE |
| Abhd4     | Hub | FALSE |
| Vim       | Hub | FALSE |
| Timp3     | Hub | FALSE |
| Ttyh3     | Hub | FALSE |
| Rnasel    | Hub | FALSE |
| 1700021K1 | Hub | FALSE |
| Rcn3      | Hub | FALSE |
| Taok1     | Hub | FALSE |
| Cnn3      | Hub | FALSE |
| Serf1     | Hub | FALSE |
| 201011110 | Hub | FALSE |
| Ccdc23    | Hub | FALSE |
| Schip1.3  | Hub | FALSE |
| Ramp3     | Hub | FALSE |
| Zfp827    | Hub | FALSE |
| Opcml     | Hub | FALSE |
| Wbp1      | Hub | FALSE |
| Bcar1     | Hub | FALSE |
| Jmjd1c    | Hub | FALSE |
| Prkaca    | Hub | FALSE |
| Spcs2     | Hub | FALSE |
| Pnrc1     | Hub | FALSE |
| Tmem9     | Hub | FALSE |
| Fibp      | Hub | FALSE |
| Foxp1     | Hub | TRUE  |
| Spred3    | Hub | FALSE |
| Eci1      | Hub | FALSE |
| Rit1      | Hub | FALSE |
| Cbr3      | Hub | FALSE |
| Sep-15    | Hub | FALSE |
| Gng10     | Hub | FALSE |
| Slc35b2   | Hub | FALSE |
| Zfp60     | Hub | FALSE |
| Parva     | Hub | FALSE |
| Dennd5a   | Hub | FALSE |
| Hs3st1    | Hub | FALSE |
| Zyx       | Hub | FALSE |
| 1810058I2 | Hub | FALSE |

|           |     |       |
|-----------|-----|-------|
| Rpl41     | Hub | FALSE |
| Uggt1     | Hub | FALSE |
| Coro2b    | Hub | FALSE |
| Ing4      | Hub | TRUE  |
| Snx22     | Hub | FALSE |
| Phf20l1   | Hub | FALSE |
| LOC100504 | Hub | FALSE |
| Sema3d    | Hub | FALSE |
| Lims2     | Hub | FALSE |
| Rps21     | Hub | FALSE |
| Tmc8      | Hub | FALSE |
| Scarf2    | Hub | FALSE |
| Arhgef9   | Hub | FALSE |
| Dap       | Hub | FALSE |
| Gtf2h5    | Hub | FALSE |
| Fam102b   | Hub | FALSE |
| Rtn4      | Hub | FALSE |
| Mrps14    | Hub | FALSE |
| Txndc12   | Hub | FALSE |
| Chd6      | Hub | FALSE |
| Myo9b     | Hub | FALSE |
| Scp2      | Hub | FALSE |
| Ldb2      | Hub | FALSE |
| Rpl37     | Hub | FALSE |
| Lamb2     | Hub | FALSE |
| Nr4a2     | Hub | TRUE  |
| Commd3    | Hub | FALSE |
| Creb3l2   | Hub | TRUE  |
| Smpd13a   | Hub | FALSE |
| Npc1      | Hub | FALSE |
| Glipr2    | Hub | FALSE |
| Plekhg5   | Hub | FALSE |
| Uqcrh     | Hub | FALSE |
| Tma7      | Hub | FALSE |
| Ankrd29   | Hub | FALSE |
| Ptpn21    | Hub | FALSE |
| Vgll3     | Hub | FALSE |
| Rassf4    | Hub | FALSE |
| Fam115a   | Hub | FALSE |
| Gm2a      | Hub | FALSE |
| Cuedc2    | Hub | FALSE |
| Mxd4      | Hub | TRUE  |
| Nkd2      | Hub | FALSE |
| Mrpl52    | Hub | FALSE |
| Mar-02    | Hub | FALSE |
| Rab14     | Hub | TRUE  |
| Cstb      | Hub | FALSE |
| Ei24      | Hub | FALSE |
| Cpped1    | Hub | FALSE |
| Ttyh1     | Hub | FALSE |

|           |     |       |
|-----------|-----|-------|
| Gpx4      | Hub | FALSE |
| Tpp1      | Hub | FALSE |
| Pcyox1    | Hub | FALSE |
| Mgat3     | Hub | FALSE |
| St3gal1   | Hub | FALSE |
| Plekhb1   | Hub | FALSE |
| Mmp11     | Hub | FALSE |
| Smim11    | Hub | FALSE |
| 6330403K0 | Hub | FALSE |
| Josd2     | Hub | FALSE |
| Tmem14c   | Hub | FALSE |
| Rcsd1     | Hub | FALSE |
| Mxra8     | Hub | FALSE |
| 2610027K0 | Hub | FALSE |
| Ak3       | Hub | FALSE |
| Arf5      | Hub | FALSE |
| Cux1      | Hub | TRUE  |
| Adam19    | Hub | FALSE |
| Tmem106t  | Hub | FALSE |
| Ap3m2     | Hub | FALSE |
| Ucp2      | Hub | FALSE |
| AI414108  | Hub | FALSE |
| Acadl     | Hub | FALSE |
| Psm8      | Hub | FALSE |
| Rims1.1   | Hub | FALSE |
| Pmepa1    | Hub | FALSE |
| Ddx17     | Hub | FALSE |
| Rgmb      | Hub | FALSE |
| Shisa4    | Hub | FALSE |
| Ldb1      | Hub | FALSE |
| Etfb      | Hub | TRUE  |
| Jam2      | Hub | FALSE |
| Ntan1     | Hub | FALSE |
| Uba52     | Hub | FALSE |
| Hadha     | Hub | FALSE |
| Cox14     | Hub | FALSE |
| Lamtor2   | Hub | FALSE |
| Ppp2r2b   | Hub | FALSE |
| Cebpz     | Hub | FALSE |
| Cfl1      | Hub | FALSE |
| Nme3      | Hub | FALSE |
| Zfand3    | Hub | FALSE |
| Cflar     | Hub | FALSE |
| Arfp2     | Hub | FALSE |
| Tgfbr2    | Hub | FALSE |
| Pde8b     | Hub | FALSE |
| Lrrc8b    | Hub | FALSE |
| Lym2      | Hub | FALSE |
| Kdelr1    | Hub | FALSE |
| Tle2      | Hub | FALSE |

|          |     |       |
|----------|-----|-------|
| 2310045N | Hub | FALSE |
| Tsc22d1  | Hub | FALSE |
| Myrf1    | Hub | FALSE |
| Matn4    | Hub | FALSE |
| Trim13   | Hub | FALSE |
| C1qtnf6  | Hub | FALSE |
| Ppp1r14c | Hub | FALSE |
| Map1a    | Hub | FALSE |
| Hint2    | Hub | FALSE |
| 2300009A | Hub | FALSE |
| Palm     | Hub | FALSE |
| Gstm7    | Hub | FALSE |
| Lars2    | Hub | FALSE |
| Mbnl2    | Hub | TRUE  |
| Ifngr1   | Hub | FALSE |
| Erp29    | Hub | FALSE |
| Tmem203  | Hub | FALSE |
| Ap1s1    | Hub | FALSE |
| Gpt2     | Hub | FALSE |
| Tmem128  | Hub | FALSE |
| Emp3     | Hub | FALSE |
| Fundc2   | Hub | FALSE |
| Tmem223  | Hub | FALSE |
| Asah1    | Hub | FALSE |
| Atp13a2  | Hub | FALSE |
| Nucb1    | Hub | TRUE  |
| Lamtor4  | Hub | FALSE |
| Hcn1     | Hub | FALSE |
| Robo2    | Hub | FALSE |
| Ftl1     | Hub | FALSE |
| Rela     | Hub | TRUE  |
| Zfand6   | Hub | FALSE |
| Chd3     | Hub | FALSE |
| Mob4     | Hub | FALSE |
| Ist1     | Hub | FALSE |
| Bmpr2    | Hub | FALSE |
| Tead1    | Hub | TRUE  |
| Ndufa4   | Hub | FALSE |
| Prr14    | Hub | FALSE |
| Kdm6b    | Hub | FALSE |
| Dbn1     | Hub | FALSE |
| Mef2d    | Hub | TRUE  |
| Cdc42ep5 | Hub | FALSE |
| Cklf     | Hub | FALSE |
| Tspan31  | Hub | FALSE |
| Tomm7    | Hub | FALSE |
| Aak1     | Hub | FALSE |
| Swi5     | Hub | FALSE |
| Atxn7l3b | Hub | FALSE |
| Thsd7a   | Hub | FALSE |

|          |     |       |
|----------|-----|-------|
| Rapgef2  | Hub | FALSE |
| Nod1     | Hub | FALSE |
| Tmed9    | Hub | FALSE |
| Tmem176a | Hub | FALSE |
| Cnpy2    | Hub | FALSE |
| Btd      | Hub | FALSE |
| Tmem176t | Hub | FALSE |
| Sdhb     | Hub | FALSE |
| Fkbp7    | Hub | FALSE |
| Gnb5     | Hub | FALSE |
| R3hdm4   | Hub | FALSE |
| Toporsos | Hub | FALSE |
| Cacfd1   | Hub | FALSE |
| Uba7     | Hub | FALSE |
| Pnpla3   | Hub | FALSE |
| Ppox     | Hub | FALSE |
| Sorbs1   | Hub | FALSE |
| Wdr6     | Hub | FALSE |
| Phpt1    | Hub | FALSE |
| H1fx     | Hub | TRUE  |
| Alcam    | Hub | FALSE |
| Ext2     | Hub | FALSE |
| Ogt      | Hub | FALSE |
| Ccs      | Hub | FALSE |
| Nynrin   | Hub | FALSE |
| Kank4    | Hub | FALSE |
| Ndufb5   | Hub | FALSE |
| Apold1   | Hub | FALSE |
| Fam65a   | Hub | FALSE |
| Fus      | Hub | FALSE |
| Slc25a4  | Hub | FALSE |
| Cdk6     | Hub | FALSE |
| Plxna4   | Hub | FALSE |
| Ndufa7   | Hub | FALSE |
| Chd2     | Hub | TRUE  |
| Dlgap4   | Hub | FALSE |
| Lbx2     | Hub | TRUE  |
| Mtss1    | Hub | FALSE |
| Rp9      | Hub | FALSE |
| Mid2     | Hub | FALSE |
| Zfp467   | Hub | TRUE  |
| Evi5     | Hub | FALSE |
| P2ry1    | Hub | FALSE |
| Arhgef2  | Hub | FALSE |
| Apoa1bp  | Hub | FALSE |
| Sdhc     | Hub | FALSE |
| Isca2    | Hub | FALSE |
| Frmd6    | Hub | FALSE |
| Irf3     | Hub | TRUE  |
| Cyp4f16  | Hub | FALSE |

|           |     |       |
|-----------|-----|-------|
| Kcnt2     | Hub | FALSE |
| Ccdc104   | Hub | FALSE |
| 1110038F1 | Hub | FALSE |
| Cyth1     | Hub | FALSE |
| Pcmt2     | Hub | FALSE |
| Tecpr1    | Hub | FALSE |
| Esr1      | Hub | TRUE  |
| Tagln2    | Hub | TRUE  |
| Capn6     | Hub | FALSE |
| Sox6      | Hub | TRUE  |
| Jun       | Hub | TRUE  |
| Zdhhc12   | Hub | FALSE |
| Otor      | Hub | FALSE |
| Mpz       | Hub | FALSE |
| Ranbp10   | Hub | FALSE |
| Kdr       | Hub | FALSE |
| Laptm4a   | Hub | FALSE |
| Lcp2      | Hub | FALSE |
| Pja2      | Hub | FALSE |
| Nedd8     | Hub | FALSE |
| Bin1      | Hub | FALSE |
| Eif1b     | Hub | FALSE |
| Zmynd11   | Hub | FALSE |
| Rnaset2b  | Hub | FALSE |
| Crtc1     | Hub | FALSE |
| Stim1     | Hub | FALSE |
| Capn2     | Hub | FALSE |
| Gemin7    | Hub | FALSE |
| 2410015M  | Hub | FALSE |
| Hif3a     | Hub | TRUE  |
| Atp5o     | Hub | FALSE |
| Otub1     | Hub | FALSE |
| Prickle2  | Hub | FALSE |
| Arid4b    | Hub | FALSE |
| Tbca      | Hub | FALSE |
| Atp5c1    | Hub | FALSE |
| Ssr2      | Hub | FALSE |
| Ndufs3    | Hub | FALSE |
| Igsf9b    | Hub | FALSE |
| Rbm24     | Hub | FALSE |
| Dag1      | Hub | FALSE |
| Furin     | Hub | FALSE |
| Nbea      | Hub | FALSE |
| H3f3a     | Hub | FALSE |
| Snx17     | Hub | FALSE |
| Polr3gl   | Hub | FALSE |
| Gm16907   | Hub | FALSE |
| Gm6402    | Hub | FALSE |
| Mageh1    | Hub | FALSE |
| 1190002F1 | Hub | FALSE |



|           |     |       |
|-----------|-----|-------|
| Fam115c   | Hub | FALSE |
| Tmem50a   | Hub | FALSE |
| Tmem134   | Hub | FALSE |
| Tead3     | Hub | TRUE  |
| Uqcc2     | Hub | FALSE |
| Ndufs8    | Hub | FALSE |
| Dexi      | Hub | FALSE |
| Smim4     | Hub | FALSE |
| Prr12     | Hub | FALSE |
| Acvrl1    | Hub | FALSE |
| Pgls      | Hub | FALSE |
| Coro1b    | Hub | FALSE |
| Jup       | Hub | FALSE |
| Zswim6    | Hub | FALSE |
| Edaradd   | Hub | FALSE |
| Nrcam     | Hub | FALSE |
| Arhgef7   | Hub | FALSE |
| Pick1     | Hub | TRUE  |
| Ccnl1     | Hub | FALSE |
| Aph1b     | Hub | FALSE |
| Stra13    | Hub | FALSE |
| Phf2      | Hub | TRUE  |
| Snord104  | Hub | FALSE |
| Fam89b    | Hub | FALSE |
| Il11ra1   | Hub | FALSE |
| Vkorc1    | Hub | FALSE |
| Emc3      | Hub | FALSE |
| Krtcap2   | Hub | FALSE |
| Dock5     | Hub | FALSE |
| Cck       | Hub | FALSE |
| Scamp2    | Hub | FALSE |
| Ctxn1     | Hub | FALSE |
| Alg14     | Hub | FALSE |
| Armcx2    | Hub | FALSE |
| Cuta      | Hub | FALSE |
| 4930579G1 | Hub | FALSE |
| Leprot    | Hub | FALSE |
| Med12l    | Hub | FALSE |
| Tmem63b   | Hub | FALSE |
| Tmem258   | Hub | FALSE |
| Tmbim6    | Hub | FALSE |
| Gnas      | Hub | FALSE |
| Pigt      | Hub | FALSE |
| Pik3ip1   | Hub | FALSE |
| Mro       | Hub | FALSE |
| 2610307P1 | Hub | FALSE |
| Ndufa2    | Hub | FALSE |
| Jtb       | Hub | FALSE |
| Qpct      | Hub | FALSE |
| Rpl35     | Hub | TRUE  |

|           |     |       |
|-----------|-----|-------|
| Cadps2    | Hub | FALSE |
| Dapp1     | Hub | FALSE |
| Prmt2     | Hub | FALSE |
| Cd81      | Hub | FALSE |
| Carkd     | Hub | FALSE |
| Osbpl5    | Hub | FALSE |
| Mink1     | Hub | FALSE |
| Pthlh     | Hub | FALSE |
| Arhgap31  | Hub | FALSE |
| Sipa1l2   | Hub | FALSE |
| Unc93b1   | Hub | FALSE |
| Agmo      | Hub | FALSE |
| Serf2     | Hub | FALSE |
| Fopnl     | Hub | FALSE |
| Csf2ra    | Hub | FALSE |
| Tomm6     | Hub | FALSE |
| Ptger1    | Hub | FALSE |
| Sars      | Hub | FALSE |
| Gpr137b   | Hub | FALSE |
| Jmjd8     | Hub | FALSE |
| Cd200     | Hub | FALSE |
| Angpt2    | Hub | FALSE |
| Phka1     | Hub | FALSE |
| Map7d1    | Hub | FALSE |
| Tmed4     | Hub | FALSE |
| Gtl3      | Hub | FALSE |
| 4933413L0 | Hub | FALSE |
| Jkamp     | Hub | FALSE |
| Ap3s1     | Hub | FALSE |
| Anxa2     | Hub | FALSE |
| Ndufa12   | Hub | FALSE |
| Cyhr1     | Hub | FALSE |
| Srsf5     | Hub | FALSE |
| Itsn2     | Hub | FALSE |
| Psme2b    | Hub | FALSE |
| Commd6    | Hub | FALSE |
| Il1rl2    | Hub | FALSE |
| Lrrtm1    | Hub | FALSE |
| Dyrk1b    | Hub | FALSE |
| Eps15     | Hub | FALSE |
| Ict1      | Hub | FALSE |
| Nisch     | Hub | FALSE |
| Ets2      | Hub | TRUE  |
| Tmem234   | Hub | FALSE |
| Slc22a23  | Hub | FALSE |
| Ssna1     | Hub | FALSE |
| Shkbp1    | Hub | FALSE |
| Gng7      | Hub | FALSE |
| Tnrc6b    | Hub | FALSE |
| Fxyd5     | Hub | FALSE |

|           |     |       |
|-----------|-----|-------|
| Atp1a1    | Hub | FALSE |
| Sema6b    | Hub | FALSE |
| Ncstn     | Hub | FALSE |
| Tecrl     | Hub | FALSE |
| Gm5607    | Hub | FALSE |
| Rbm5      | Hub | FALSE |
| Ik        | Hub | FALSE |
| Txndc16   | Hub | FALSE |
| Stx4a     | Hub | FALSE |
| Sgk3      | Hub | FALSE |
| Tnk2      | Hub | FALSE |
| Eif3k     | Hub | FALSE |
| Med28     | Hub | FALSE |
| Arpc2     | Hub | FALSE |
| Nt5dc3    | Hub | FALSE |
| Dab2ip    | Hub | FALSE |
| Dpysl4    | Hub | FALSE |
| Glb1      | Hub | FALSE |
| Hdac5     | Hub | FALSE |
| 181003711 | Hub | FALSE |
| Atp5j     | Hub | FALSE |
| Vwa5a     | Hub | FALSE |
| Crip2     | Hub | FALSE |
| Rab29     | Hub | FALSE |
| Pkd1      | Hub | FALSE |
| Acp2      | Hub | FALSE |
| Sct       | Hub | FALSE |
| Grik5     | Hub | FALSE |
| Cyr61     | Hub | FALSE |
| Zc3h12c   | Hub | FALSE |
| Hes6      | Hub | TRUE  |
| Ufc1      | Hub | FALSE |
| Bcl11b    | Hub | TRUE  |
| 4930402H2 | Hub | FALSE |
| Prss23    | Hub | FALSE |
| Nckap5    | Hub | FALSE |
| Msrb2     | Hub | FALSE |
| Capns1    | Hub | FALSE |
| Psen2     | Hub | FALSE |
| Plec      | Hub | FALSE |
| Spata24   | Hub | FALSE |
| Lmo1      | Hub | FALSE |
| Prkcdbp   | Hub | FALSE |
| Edf1      | Hub | FALSE |
| Brinp1    | Hub | FALSE |
| Chchd7    | Hub | FALSE |
| Nr4a1     | Hub | TRUE  |
| Mrps21    | Hub | FALSE |
| Uqcrb     | Hub | TRUE  |
| Rpp21     | Hub | FALSE |

|            |     |       |
|------------|-----|-------|
| Dnajc7     | Hub | FALSE |
| Aamdc      | Hub | FALSE |
| Bckdha     | Hub | FALSE |
| Olfml2b    | Hub | FALSE |
| Tvp23b     | Hub | FALSE |
| Sema3b     | Hub | FALSE |
| Tlr3       | Hub | FALSE |
| Smarcd3    | Hub | FALSE |
| Nktr       | Hub | FALSE |
| Nudt16l1   | Hub | FALSE |
| Calcoco1   | Hub | FALSE |
| Aup1       | Hub | FALSE |
| Slc40a1    | Hub | FALSE |
| Rps15a-psf | Hub | FALSE |
| Bcl11a     | Hub | TRUE  |
| Fam114a2   | Hub | FALSE |
| Abca1      | Hub | FALSE |
| Tbc1d23    | Hub | FALSE |
| Etv1       | Hub | TRUE  |
| Ube2w      | Hub | FALSE |
| Brk1       | Hub | FALSE |
| Cox6c      | Hub | FALSE |
| Rbm39      | Hub | FALSE |
| Mir6236    | Hub | FALSE |
| Plscr3     | Hub | FALSE |
| Scaf1      | Hub | FALSE |
| Gab2       | Hub | FALSE |
| Rnf19a     | Hub | FALSE |
| 1810026BC  | Hub | FALSE |
| Lamtor1    | Hub | FALSE |
| Mocs2      | Hub | FALSE |
| Gsn        | Hub | FALSE |
| Pik3r3     | Hub | FALSE |
| Manba      | Hub | FALSE |
| Mrpl34     | Hub | FALSE |
| Spaca6     | Hub | FALSE |
| Gkap1      | Hub | FALSE |
| Evi5l      | Hub | FALSE |
| Ssh2       | Hub | FALSE |
| Htr3a      | Hub | FALSE |
| Clip3      | Hub | FALSE |
| Mrps33     | Hub | FALSE |
| 2700081O1  | Hub | FALSE |
| Cox6b1     | Hub | FALSE |
| Psm5       | Hub | FALSE |
| Cisd3      | Hub | FALSE |
| Cd1d1      | Hub | FALSE |
| Narf       | Hub | FALSE |
| Kcna6      | Hub | FALSE |
| Gga1       | Hub | FALSE |

|           |     |       |
|-----------|-----|-------|
| Nox4      | Hub | FALSE |
| Uqcr10    | Hub | FALSE |
| Cpt1c     | Hub | FALSE |
| Glrx2     | Hub | FALSE |
| Spry1     | Hub | FALSE |
| Aifm2     | Hub | FALSE |
| Ndufc2    | Hub | FALSE |
| Idh3b     | Hub | FALSE |
| D630045J1 | Hub | FALSE |
| Ptprf     | Hub | FALSE |
| Fam222a   | Hub | FALSE |
| Kctd17    | Hub | FALSE |
| Atf5      | Hub | TRUE  |
| P2rx4     | Hub | FALSE |
| Slc25a23  | Hub | FALSE |
| Arhgef3   | Hub | FALSE |
| Zfp523    | Hub | TRUE  |
| Stk25     | Hub | FALSE |
| C130071CC | Hub | FALSE |
| Sidt2     | Hub | FALSE |
| Snap47    | Hub | FALSE |
| Ndufa6    | Hub | FALSE |
| Cux2      | Hub | TRUE  |
| Zfp513    | Hub | TRUE  |
| Pbx4      | Hub | TRUE  |
| Gm16617   | Hub | FALSE |
| Zfhx3     | Hub | TRUE  |
| Eif3h     | Hub | FALSE |
| Mapk3     | Hub | FALSE |
| Nrep      | Hub | FALSE |
| Gamt      | Hub | FALSE |
| Akt1s1    | Hub | FALSE |
| Tesk1     | Hub | FALSE |
| Cox8a     | Hub | FALSE |
| Galt      | Hub | FALSE |
| Scarb2    | Hub | FALSE |
| Fgfr1     | Hub | FALSE |
| Rnf217    | Hub | FALSE |
| Znf512b   | Hub | FALSE |
| Dpm3      | Hub | FALSE |
| Gdpd2     | Hub | FALSE |
| Zdhhc8    | Hub | FALSE |
| Cap2      | Hub | FALSE |
| Rras      | Hub | FALSE |
| Uqcrq     | Hub | FALSE |
| Sra1      | Hub | FALSE |
| Sh3glb2   | Hub | FALSE |
| Bcl7a     | Hub | FALSE |
| Bcl2l2    | Hub | FALSE |
| Loxl4     | Hub | FALSE |

|           |     |       |
|-----------|-----|-------|
| Faim      | Hub | FALSE |
| G0s2      | Hub | FALSE |
| A730017L2 | Hub | FALSE |
| B2m       | Hub | FALSE |
| Speg      | Hub | FALSE |
| Fzd1      | Hub | FALSE |
| Zswim8    | Hub | FALSE |
| Dlx5      | Hub | TRUE  |
| Prkca     | Hub | FALSE |
| Arntl     | Hub | TRUE  |
| Astn1     | Hub | FALSE |
| Lpcat2    | Hub | FALSE |
| Klc4      | Hub | FALSE |
| Pfdn5     | Hub | FALSE |
| Fzd8      | Hub | FALSE |
| Hdac4     | Hub | FALSE |
| Plxnb3    | Hub | FALSE |
| Gm2382    | Hub | FALSE |
| Fam168a   | Hub | FALSE |
| Riad1     | Hub | FALSE |
| Ift20     | Hub | FALSE |
| Chpf2     | Hub | FALSE |
| Ddc       | Hub | FALSE |
| Gm10863   | Hub | FALSE |
| Luc7l3    | Hub | FALSE |
| Mbd6      | Hub | FALSE |
| Dip2b     | Hub | FALSE |
| Phyh      | Hub | FALSE |
| Mrpl24    | Hub | FALSE |
| Ccnl2     | Hub | FALSE |
| Nbr1      | Hub | FALSE |
| Npc2      | Hub | FALSE |
| Tagln     | Hub | FALSE |
| Trim35    | Hub | FALSE |
| Stx5a     | Hub | FALSE |
| Bad       | Hub | TRUE  |
| Nalcn     | Hub | FALSE |
| Rpl38     | Hub | FALSE |
| Ypel5     | Hub | FALSE |
| Tdrkh     | Hub | FALSE |
| Cwc15     | Hub | FALSE |
| Smim20    | Hub | FALSE |
| Kif1b     | Hub | FALSE |
| Mtch1     | Hub | FALSE |
| Naa38     | Hub | FALSE |
| Mrps24    | Hub | FALSE |
| Itga2     | Hub | FALSE |
| Atp8a1    | Hub | FALSE |
| Higd2a    | Hub | FALSE |
| Acaa1a    | Hub | TRUE  |

|            |     |       |
|------------|-----|-------|
| Immp1l     | Hub | FALSE |
| Cntlh      | Hub | FALSE |
| Fam195b    | Hub | FALSE |
| D8Erttd738 | Hub | FALSE |
| Elovl1     | Hub | FALSE |
| Atp1a2     | Hub | FALSE |
| Synrg      | Hub | FALSE |
| Rgs2       | Hub | FALSE |
| Abcd2      | Hub | FALSE |
| 2310039H   | Hub | FALSE |
| Shc1       | Hub | FALSE |
| Wdsub1     | Hub | FALSE |
| Dhh        | Hub | FALSE |
| Fam214b    | Hub | FALSE |
| Ndst1      | Hub | FALSE |
| Nab1       | Hub | FALSE |
| Fam214a    | Hub | FALSE |
| Tecta      | Hub | FALSE |
| Nudt13     | Hub | FALSE |
| Creg1      | Hub | FALSE |
| Kmt2d      | Hub | FALSE |
| Gpr153     | Hub | FALSE |
| Tmem208    | Hub | FALSE |
| Krt10      | Hub | FALSE |
| Cryab      | Hub | FALSE |
| Dll3       | Hub | FALSE |
| Qsox1      | Hub | FALSE |
| Hsd1l2     | Hub | FALSE |
| Fbxo25     | Hub | FALSE |
| Rc3h2      | Hub | FALSE |
| Pacs2      | Hub | FALSE |
| Tle6       | Hub | FALSE |
| D10Jhu81e  | Hub | FALSE |
| Trib2      | Hub | FALSE |
| Fam134b    | Hub | FALSE |
| Atp11a     | Hub | FALSE |
| Itpr3      | Hub | FALSE |
| Gtpbp2     | Hub | FALSE |
| Sumf1      | Hub | FALSE |
| Mettl23    | Hub | FALSE |
| Txndc9     | Hub | FALSE |
| Ggh        | Hub | FALSE |
| D330023K1  | Hub | FALSE |
| Chchd2     | Hub | FALSE |
| Golga4     | Hub | FALSE |
| Ptgfrn     | Hub | FALSE |
| Gm3258     | Hub | FALSE |
| Mlxip      | Hub | TRUE  |
| Fbxw5      | Hub | FALSE |
| Pla2r1     | Hub | FALSE |

|           |     |       |
|-----------|-----|-------|
| Tmx4      | Hub | FALSE |
| Pnpla8    | Hub | FALSE |
| Plxnb2    | Hub | FALSE |
| 0610012G  | Hub | FALSE |
| Mfsd11    | Hub | FALSE |
| Gm14057   | Hub | FALSE |
| Palm2     | Hub | FALSE |
| S100a10   | Hub | FALSE |
| Epn1      | Hub | FALSE |
| Bcap31    | Hub | FALSE |
| Tbx20     | Hub | TRUE  |
| Zfp395    | Hub | FALSE |
| Plekha4   | Hub | FALSE |
| Tm4sf1    | Hub | FALSE |
| Rnf182    | Hub | FALSE |
| Sdf2      | Hub | FALSE |
| Tmem241   | Hub | FALSE |
| Mrpl14    | Hub | FALSE |
| Flrt2     | Hub | FALSE |
| Fuom      | Hub | FALSE |
| Pear1     | Hub | FALSE |
| Slc25a12  | Hub | FALSE |
| Rdh14     | Hub | FALSE |
| Mthfr     | Hub | FALSE |
| Bend5     | Hub | FALSE |
| Paip2     | Hub | FALSE |
| Atp5h     | Hub | FALSE |
| Ip6k1     | Hub | FALSE |
| Insl6     | Hub | FALSE |
| Cntn6     | Hub | FALSE |
| Ccng2     | Hub | FALSE |
| Ash1l     | Hub | FALSE |
| Rnpep     | Hub | FALSE |
| Frg1      | Hub | FALSE |
| Lztr1     | Hub | FALSE |
| Polr2g    | Hub | FALSE |
| B4galt3   | Hub | FALSE |
| Msrb1     | Hub | FALSE |
| Erlec1    | Hub | FALSE |
| Il3ra     | Hub | FALSE |
| Ptov1     | Hub | FALSE |
| Psme2     | Hub | FALSE |
| Iffo1     | Hub | FALSE |
| Grid2     | Hub | FALSE |
| Dok1      | Hub | FALSE |
| Rock1     | Hub | FALSE |
| C1galt1c1 | Hub | FALSE |
| Farp2     | Hub | FALSE |
| Erp44     | Hub | FALSE |
| Rcan3     | Hub | FALSE |



|           |     |       |
|-----------|-----|-------|
| Sec61b    | Hub | FALSE |
| Foxn3     | Hub | TRUE  |
| Myl6      | Hub | FALSE |
| Itpkb     | Hub | FALSE |
| Lrrc8c    | Hub | FALSE |
| Pxmp4     | Hub | FALSE |
| Gps2      | Hub | FALSE |
| Crym      | Hub | FALSE |
| Anapc16   | Hub | FALSE |
| Flrt1     | Hub | FALSE |
| Mpnd      | Hub | FALSE |
| Fndc3b    | Hub | FALSE |
| Cxx1b     | Hub | TRUE  |
| Cdk19     | Hub | FALSE |
| Hp1bp3    | Hub | TRUE  |
| Znrf1     | Hub | FALSE |
| Smim24    | Hub | FALSE |
| Gpcpd1    | Hub | FALSE |
| 2010107E0 | Hub | FALSE |
| Chmp5     | Hub | FALSE |
| Rec8      | Hub | FALSE |
| Mcee      | Hub | FALSE |
| Baiap2    | Hub | FALSE |
| Tmem104   | Hub | FALSE |
| Sp3os     | Hub | FALSE |
| Aktip     | Hub | FALSE |
| Hspb11    | Hub | FALSE |
| S100b     | Hub | FALSE |
| Cox6b2    | Hub | FALSE |
| Col3a1    | Hub | FALSE |
| Kif3a     | Hub | FALSE |
| Gm10789   | Hub | FALSE |
| Insr      | Hub | FALSE |
| Ilvbl     | Hub | FALSE |
| Pik3r1    | Hub | FALSE |
| 2310030G  | Hub | FALSE |
| Dad1      | Hub | FALSE |
| Fbxl20    | Hub | FALSE |
| Xylt1     | Hub | FALSE |
| Amfr      | Hub | FALSE |
| Sec24d    | Hub | FALSE |
| Lemd3     | Hub | FALSE |
| Caml      | Hub | FALSE |
| Urod      | Hub | FALSE |
| Enpp4     | Hub | FALSE |
| Glt8d1    | Hub | FALSE |
| Nfib      | Hub | TRUE  |
| Bri3      | Hub | FALSE |
| Rer1      | Hub | FALSE |
| Git2      | Hub | TRUE  |

|           |     |       |
|-----------|-----|-------|
| Ndufa13   | Hub | FALSE |
| Ncor2     | Hub | TRUE  |
| Zfp945    | Hub | FALSE |
| Sf3b6     | Hub | FALSE |
| Cyp2j9    | Hub | FALSE |
| Stat3     | Hub | TRUE  |
| Mamld1    | Hub | FALSE |
| Dpm2      | Hub | FALSE |
| Pnlsr     | Hub | FALSE |
| Dact3     | Hub | FALSE |
| Akr1cl    | Hub | FALSE |
| Trmt2b    | Hub | FALSE |
| Ddah2     | Hub | FALSE |
| Zfyve1    | Hub | FALSE |
| Hand2     | Hub | TRUE  |
| Anapc13   | Hub | FALSE |
| Vsnl1     | Hub | FALSE |
| Cbr1      | Hub | FALSE |
| Atp6ap2   | Hub | FALSE |
| Slc22a17  | Hub | FALSE |
| Fam160a2  | Hub | FALSE |
| Phkg2     | Hub | FALSE |
| Hspb2     | Hub | FALSE |
| Adprh     | Hub | FALSE |
| A330049N  | Hub | FALSE |
| Itfg1     | Hub | FALSE |
| Ndufs6    | Hub | FALSE |
| Pcdhga12  | Hub | FALSE |
| Tmem191c  | Hub | FALSE |
| Ndufb3    | Hub | FALSE |
| Gramd1a   | Hub | FALSE |
| 9330188P0 | Hub | FALSE |
| Sec14l2   | Hub | FALSE |
| 1700113A1 | Hub | FALSE |
| Grcc10    | Hub | FALSE |
| Tmx2      | Hub | FALSE |
| Cpm       | Hub | FALSE |
| Rgs3      | Hub | FALSE |
| Deaf1     | Hub | TRUE  |
| Nanos3    | Hub | FALSE |
| Nradd     | Hub | FALSE |
| Dmpk      | Hub | FALSE |
| Tmem119   | Hub | FALSE |
| Ankrd46   | Hub | FALSE |
| Tmem88b   | Hub | FALSE |
| Mib2      | Hub | FALSE |
| Rin3      | Hub | FALSE |
| Nron      | Hub | FALSE |
| Sh3gl3    | Hub | FALSE |
| Rnf13     | Hub | FALSE |

|           |     |       |
|-----------|-----|-------|
| Ddost     | Hub | FALSE |
| Tmsb15b1  | Hub | FALSE |
| Cdk5      | Hub | FALSE |
| 1810022K0 | Hub | FALSE |
| Scand1    | Hub | FALSE |
| Rraga     | Hub | FALSE |
| Nfia      | Hub | TRUE  |
| 5930403L1 | Hub | FALSE |
| Trerf1    | Hub | TRUE  |
| Yipf3     | Hub | FALSE |
| Fuz       | Hub | FALSE |
| Agtrap    | Hub | FALSE |
| Mthfs     | Hub | FALSE |
| Cox20     | Hub | FALSE |
| Lonp2     | Hub | FALSE |
| Exoc4     | Hub | FALSE |
| Abtb2     | Hub | FALSE |
| Slc44a2   | Hub | FALSE |
| Shank1    | Hub | FALSE |
| Hn1       | Hub | FALSE |
| Creld1    | Hub | FALSE |
| G5300110  | Hub | FALSE |
| Ksr1      | Hub | FALSE |
| Pld3      | Hub | FALSE |
| Lancl1    | Hub | FALSE |
| Pttg1ip   | Hub | FALSE |
| Rnf11     | Hub | FALSE |
| Athl1     | Hub | FALSE |
| Mrpl27    | Hub | FALSE |
| Fendrr    | Hub | FALSE |
| Rnf157    | Hub | FALSE |
| Sin3b     | Hub | FALSE |
| Eps8      | Hub | FALSE |
| 2900026AC | Hub | FALSE |
| Mob3c     | Hub | FALSE |
| Lrrc8a    | Hub | FALSE |
| Lrch1     | Hub | FALSE |
| Timm8b    | Hub | FALSE |
| Rsu1      | Hub | FALSE |
| Pfkfb4    | Hub | FALSE |
| Ier3ip1   | Hub | FALSE |
| Neu1      | Hub | FALSE |
| Strn4     | Hub | FALSE |
| Slc2a8    | Hub | FALSE |
| Exoc6b    | Hub | FALSE |
| Arhgap22  | Hub | FALSE |
| Pet100    | Hub | FALSE |
| Shisa5    | Hub | FALSE |
| Zmiz2     | Hub | FALSE |
| Lrrn1     | Hub | FALSE |

|           |     |       |
|-----------|-----|-------|
| Tubb4a    | Hub | FALSE |
| Carhsp1   | Hub | FALSE |
| Dhrs1     | Hub | FALSE |
| Gfra3     | Hub | FALSE |
| Slc25a17  | Hub | FALSE |
| Lemd2     | Hub | FALSE |
| Spcs1     | Hub | FALSE |
| 1110065P2 | Hub | FALSE |
| Gm5617    | Hub | FALSE |
| Tmem40    | Hub | FALSE |
| Slc30a9   | Hub | FALSE |
| Akap8l    | Hub | FALSE |
| Slc16a7   | Hub | FALSE |
| Chmp1b    | Hub | FALSE |
| Snapin    | Hub | FALSE |
| Stk32a    | Hub | FALSE |
| Cope      | Hub | FALSE |
| Slc27a4   | Hub | FALSE |
| Usp11     | Hub | FALSE |
| Dclk2     | Hub | FALSE |
| Fam120a   | Hub | FALSE |
| Sun1      | Hub | FALSE |
| Tspan13   | Hub | FALSE |
| Zfp637    | Hub | TRUE  |
| Ppargc1a  | Hub | TRUE  |
| Tnni1     | Hub | FALSE |
| Hist1h2ag | Hub | FALSE |
| Ncor1     | Hub | TRUE  |
| Bcl2l1    | Hub | FALSE |
| Tm7sf3    | Hub | FALSE |
| Nab2      | Hub | FALSE |
| Clk1      | Hub | TRUE  |
| Ebf4      | Hub | TRUE  |
| Rnf150    | Hub | FALSE |
| Snrnp27   | Hub | FALSE |
| C1galt1   | Hub | FALSE |
| Hdac8     | Hub | TRUE  |
| Atp5j2    | Hub | FALSE |
| Crtc3     | Hub | FALSE |
| Limk1     | Hub | FALSE |
| Sec61g    | Hub | FALSE |
| Rasgrp2   | Hub | FALSE |
| Tulp4     | Hub | FALSE |
| Lmna      | Hub | FALSE |
| Rab1b     | Hub | FALSE |
| Rhoa      | Hub | FALSE |
| Prkd2     | Hub | FALSE |
| Ticam1    | Hub | FALSE |
| 1110058L1 | Hub | FALSE |
| Plxdc2    | Hub | FALSE |

|            |     |       |
|------------|-----|-------|
| Trappc6a   | Hub | FALSE |
| Lrp12      | Hub | FALSE |
| Agpat1     | Hub | FALSE |
| Syap1      | Hub | FALSE |
| Pde8a      | Hub | FALSE |
| Rnh1       | Hub | FALSE |
| Hexb       | Hub | FALSE |
| Ndufc1     | Hub | FALSE |
| Kmt2a      | Hub | TRUE  |
| Rnf135     | Hub | FALSE |
| Mbd2       | Hub | TRUE  |
| Gpm6a      | Hub | FALSE |
| Dnajb2     | Hub | FALSE |
| Arl6ip5    | Hub | FALSE |
| Plekhn2    | Hub | FALSE |
| 1500011K1  | Hub | FALSE |
| Ypel3      | Hub | FALSE |
| Atp6v0e2   | Hub | FALSE |
| Lrrc4b     | Hub | FALSE |
| 2610206C1  | Hub | FALSE |
| Sbk1       | Hub | FALSE |
| Galnt10    | Hub | FALSE |
| Chst7      | Hub | FALSE |
| Rxrg       | Hub | TRUE  |
| Urgcp      | Hub | FALSE |
| Mast3      | Hub | FALSE |
| Sfxn4      | Hub | FALSE |
| Ggact      | Hub | FALSE |
| A330076H   | Hub | FALSE |
| Ccdc82     | Hub | FALSE |
| Fam19a5    | Hub | FALSE |
| Mff        | Hub | FALSE |
| Slc25a11   | Hub | FALSE |
| I730030J21 | Hub | FALSE |
| Gm1673     | Hub | FALSE |
| Prrc2b     | Hub | FALSE |
| Pigyl      | Hub | FALSE |
| Ctsa       | Hub | FALSE |
| Gap43      | Hub | FALSE |
| Jak2       | Hub | FALSE |
| Psmb1      | Hub | FALSE |
| 2310015A1  | Hub | FALSE |
| Dctn5      | Hub | FALSE |
| Kcne1l     | Hub | FALSE |
| Aff2       | Hub | FALSE |
| Vps9d1     | Hub | FALSE |
| Mpped2     | Hub | FALSE |
| Slc12a6    | Hub | FALSE |
| Mripip     | Hub | FALSE |
| Secisbp2l  | Hub | FALSE |

|           |     |       |
|-----------|-----|-------|
| Nhs       | Hub | FALSE |
| Dnajc18   | Hub | FALSE |
| Srebf1    | Hub | TRUE  |
| Rnf215    | Hub | FALSE |
| Mon2      | Hub | FALSE |
| Npas3     | Hub | FALSE |
| Nfkbiz    | Hub | FALSE |
| Egln2     | Hub | FALSE |
| Psme1     | Hub | FALSE |
| Creb3     | Hub | TRUE  |
| Cadm4     | Hub | FALSE |
| Klhl24    | Hub | FALSE |
| Cryzl1    | Hub | FALSE |
| Mgrn1     | Hub | FALSE |
| Tspo      | Hub | FALSE |
| Hacl1     | Hub | FALSE |
| Gm15663   | Hub | FALSE |
| Mospd3    | Hub | FALSE |
| Ccdc142   | Hub | FALSE |
| Slc25a45  | Hub | FALSE |
| Dmrta1    | Hub | TRUE  |
| Cox7c     | Hub | FALSE |
| Araf      | Hub | FALSE |
| Ppp2r5c   | Hub | FALSE |
| Fis1      | Hub | FALSE |
| Tmed3     | Hub | FALSE |
| Rffl      | Hub | FALSE |
| Gnb4      | Hub | FALSE |
| Chrm1     | Hub | FALSE |
| Otud1     | Hub | FALSE |
| Zfp93     | Hub | TRUE  |
| Pqbp1     | Hub | TRUE  |
| Snx25     | Hub | FALSE |
| Creb5     | Hub | TRUE  |
| Gm7694    | Hub | FALSE |
| Hsd3b7    | Hub | FALSE |
| 2610203C2 | Hub | FALSE |
| Tspyl3    | Hub | FALSE |
| Mocs1     | Hub | FALSE |
| Rfx1      | Hub | TRUE  |
| Lamtor5   | Hub | FALSE |
| Zfp810    | Hub | FALSE |
| Ager      | Hub | FALSE |
| Cdipt     | Hub | FALSE |
| Scamp3    | Hub | FALSE |
| Ubl5      | Hub | FALSE |
| Acox1     | Hub | FALSE |
| Cd99l2    | Hub | FALSE |
| Dync1i2   | Hub | FALSE |
| Dennd1b   | Hub | FALSE |

|           |     |       |
|-----------|-----|-------|
| Dnpep     | Hub | FALSE |
| Plcb2     | Hub | FALSE |
| Ccdc47    | Hub | FALSE |
| F630111L1 | Hub | FALSE |
| Herc3     | Hub | FALSE |
| Calhm2    | Hub | FALSE |
| Pdgb      | Hub | FALSE |
| Zdhhc1    | Hub | FALSE |
| Ppm1k     | Hub | FALSE |
| Rab11a    | Hub | FALSE |
| 2810013PC | Hub | FALSE |
| Cpq       | Hub | FALSE |
| Hipk3     | Hub | FALSE |
| Chsy3     | Hub | FALSE |
| Praf2     | Hub | FALSE |
| Whamm     | Hub | FALSE |
| Snf8      | Hub | FALSE |
| Rnf145    | Hub | FALSE |
| Rpph1     | Hub | FALSE |
| Trp53i13  | Hub | FALSE |
| Atp5g3    | Hub | FALSE |
| Fzd6      | Hub | FALSE |
| Nfu1      | Hub | FALSE |
| Nat6      | Hub | FALSE |
| Mfng      | Hub | FALSE |
| Cxx1a     | Hub | TRUE  |
| Gsk3a     | Hub | FALSE |
| Car6      | Hub | FALSE |
| Dcaf6     | Hub | FALSE |
| Slc37a2   | Hub | FALSE |
| Supt4a    | Hub | FALSE |
| Adam22    | Hub | FALSE |
| Pld1      | Hub | FALSE |
| Polr2i    | Hub | FALSE |
| Syvn1     | Hub | FALSE |
| Myo9a     | Hub | FALSE |
| Sec62     | Hub | FALSE |
| Pold4     | Hub | FALSE |
| Mpc2      | Hub | FALSE |
| Ssr4      | Hub | FALSE |
| Tpd52     | Hub | FALSE |
| Nphp3     | Hub | FALSE |
| Zmym5     | Hub | FALSE |
| 2210016L2 | Hub | FALSE |
| Brox      | Hub | FALSE |
| Ttc5      | Hub | FALSE |
| Cox19     | Hub | FALSE |
| Fkbp8     | Hub | FALSE |
| Fam32a    | Hub | FALSE |
| Ly6g6f    | Hub | FALSE |

|           |     |       |
|-----------|-----|-------|
| Thbs2     | Hub | FALSE |
| Ttc39c    | Hub | FALSE |
| Tet2      | Hub | FALSE |
| Iscu      | Hub | FALSE |
| Glb1l     | Hub | FALSE |
| AA465934  | Hub | FALSE |
| Selm      | Hub | FALSE |
| Mtmr7     | Hub | FALSE |
| Mpp1      | Hub | FALSE |
| Mmd2      | Hub | FALSE |
| Hap1      | Hub | FALSE |
| Zfp628    | Hub | TRUE  |
| C030037D  | Hub | FALSE |
| Lrrc1     | Hub | FALSE |
| Txndc15   | Hub | FALSE |
| Diablo    | Hub | TRUE  |
| Tacc2     | Hub | FALSE |
| Ndufa11   | Hub | FALSE |
| Drap1     | Hub | FALSE |
| Ddhd1     | Hub | FALSE |
| Dynll1    | Hub | FALSE |
| Comt      | Hub | FALSE |
| Stom      | Hub | FALSE |
| Nol7      | Hub | FALSE |
| Cic       | Hub | TRUE  |
| Pygo1     | Hub | FALSE |
| Hsbp1     | Hub | FALSE |
| Fam46a    | Hub | FALSE |
| Rab11fip5 | Hub | FALSE |
| Tlx2      | Hub | TRUE  |
| Pdgfd     | Hub | FALSE |
| Kat2b     | Hub | FALSE |
| Bnc2      | Hub | TRUE  |
| Sec11c    | Hub | FALSE |
| Atp5d     | Hub | FALSE |
| Apobec3   | Hub | FALSE |
| Appl1     | Hub | FALSE |
| Gabarap   | Hub | FALSE |
| C030039L0 | Hub | FALSE |
| Churc1    | Hub | TRUE  |
| Sdccag3   | Hub | FALSE |
| Ubxn4     | Hub | FALSE |
| Prdx6b    | Hub | FALSE |
| 4930412O1 | Hub | FALSE |
| Bcl9l     | Hub | FALSE |
| Zcwpw1    | Hub | FALSE |
| Zfp30     | Hub | TRUE  |
| Fhit      | Hub | FALSE |
| Dcxr      | Hub | FALSE |
| Dusp3     | Hub | FALSE |



|          |     |       |
|----------|-----|-------|
| Hexa     | Hub | FALSE |
| Ttc28    | Hub | FALSE |
| Fam3a    | Hub | FALSE |
| Cd40     | Hub | FALSE |
| Arhgap39 | Hub | FALSE |
| Fbrs     | Hub | FALSE |
| Trappc9  | Hub | FALSE |
| Gm13315  | Hub | FALSE |
| Lamp2    | Hub | FALSE |
| Stk33    | Hub | FALSE |
| Sar1b    | Hub | FALSE |
| Rab3gap2 | Hub | FALSE |
| Ly96     | Hub | FALSE |
| Zfhx2    | Hub | TRUE  |
| Dnm2     | Hub | FALSE |

Common genes shared between neural crest and "hub" cells. Transcription factors (TFs) are designated

in the "TF" column with "TRUE"
